# Supplementary material for: Comprehensive transcriptomic analysis reveals canonical and novel pathways modulated by nanoceria in mammalian retinal degeneration
Source: Research Square preprint supplement (doi:10.21203/rs.3.rs-7456023/v1), 2025-10-25
Supplement: Supplementary file 1 [file 3abaa167229ea4319231d1d0.xlsx]

## Sheet: Table_S5_NANO_vs_CTRL_DEGs
Gene	log2FC	FDR
Gdf1	-9.26009	0.004109
NEWGENE_1304700	-9.15186	0.0148792
Krtap1-5	-8.27297	0.0168404
LOC102556337	-7.97935	0.0167242
LOC100361052	7.73878	0.032708
Krtap15-1	-7.29881	0.002862
Olr1641	7.12082	0.0342473
Awat2	-6.6667	0.0001045
LOC102549714	6.65896	1.221e-10
ENSRNOG00000049870	6.52346	0.004231
LOC100365588	-6.47308	0.01798
Krtap14	-6.27034	0.0240454
AABR07010747.1	-5.93385	0.00153
Aadac	-5.84025	0.009087
RGD1559622	-5.76564	0.0122834
Awat1	-5.73304	0.0108526
AABR07056503.1	-5.56196	1.037e-07
LOC102547059	-5.50441	0.044902
Krt86	-5.42825	0.007563
Acnat1	5.42548	0.002457
Krtap3-1	-5.37672	0.0389858
Orm1	5.12468	3.578e-05
RGD1559644	-4.93225	0.0445238
LOC100361105	4.90925	0.001729
Sdr16c6	-4.85658	0.0284714
Krt83	-4.84975	0.0221494
Krtap3-3	-4.75956	0.0432291
LOC100360575_1	4.48189	0.0001079
Rbp7	-4.45971	0.0304771
Cyp2b2	-4.39617	0.0106958
AABR07034730.2	4.28457	0.0248737
Rn50_15_0408.6	4.28015	1.874e-05
Krt77	-4.25504	0.007589
Krtap7-1	-4.15609	0.027309
Impad1_1	-4.08285	0.011701
Krtap16-5	-4.05154	0.0279343
RGD1564463	-4.02604	0.0400934
Acod1	3.84853	0.002156
Ibsp	3.56551	4.41e-06
RGD1562319_2	-3.53236	0.0376552
Clec4e	3.43193	0.006068
Lilrb3	3.43078	3.389e-09
AABR07037356.1	3.27799	0.0004678
Gzmb	3.26111	0.00115
RGD1562652	3.14777	0.034912
AABR07051562.1	3.08163	0.0131495
Lalba	-2.97594	0.0009238
LOC108349682	-2.87628	0.0252881
Ms4a4c	2.77981	0.0001321
RGD1564937	2.75707	0.0328538
AABR07060872.1	2.73929	0.000229
Siglech	2.72318	0.001606
Chi3l1	2.6942	2.261e-23
Nxpe5	2.62967	0.0105926
AC094053.1	-2.55033	0.007527
Jchain	2.50602	6.133e-05
Acsm4	-2.49837	0.023892
Dntt	2.49491	0.002537
Klra5_4	2.49047	0.0002206
Actg2	-2.48627	9.484e-09
C3	2.48005	1.037e-07
Vom2r44	-2.47662	1.037e-07
Tcaf2	-2.44667	0.0254701
Krt34	-2.43333	0.0275796
Il17rb	2.42733	4.132e-13
Cxcl11	2.42024	2.15e-07
LOC497796	2.3693	5.653e-06
Fcrl3	2.35379	0.007525
Micb	2.33042	0.0001167
Fcnb	2.3002	0.001729
Scn10a	2.29011	0.0071
Lilrb4	2.28907	4.7e-05
LOC100361706_1	2.28376	0.042989
Ttc24	-2.25686	7.2e-07
LOC24906	2.16771	0.001024
Ptprh	2.16324	0.0009442
AABR07061237.1	2.15556	0.0437838
Tectb	2.1149	2.505e-05
Ly9	2.10576	0.002175
AABR07018226.2	2.09014	0.0005322
Rn60_9_0921.1	2.08522	0.001667
Sit1	2.08221	0.00358
ENSRNOG00000034190	2.07106	0.0002749
Muc16	-2.07077	0.006202
Csf3r	2.06436	5.53e-05
Cd84	2.04926	6.339e-09
Gcsam	2.00255	0.0001079
LOC681341	1.98807	0.0071
AABR07035791.1	-1.98591	0.0387717
F10	1.97043	0.0003087
Fcgr3a	1.95729	3.054e-07
RGD1561143	1.95623	0.0163722
Cd3d	1.9538	0.005321
Mpa2l	1.95097	0.0298278
LOC103690139	1.95015	0.0133835
Trat1	1.9497	0.0359516
AC096792.1	-1.9403	0.0217242
AABR07058479.1	1.92831	0.0129235
Clec4d	1.9148	0.0129569
Gpr31	1.90421	4.152e-05
Hk3	1.8919	9.737e-05
Cd3e	1.87038	0.0009844
Nlrp1a	1.85293	6.941e-06
Olr36	1.81088	0.004358
Cd22	1.77002	7.69e-05
Cxcl13	1.76939	6.072e-05
Pdcd1	1.76674	0.0122143
Ccl4	1.74286	0.0004242
AC128059.3	1.7365	0.0160878
Mmp9	1.73349	0.0100842
LOC680910	1.73147	0.00196
Trib3	-1.72482	5.032e-08
Xcr1	1.70909	0.000872
AABR07017902.1	1.69467	0.0006374
Havcr1	1.69139	0.0372209
Gfap	1.68138	0.002457
LOC100911215	1.67568	0.007527
AC128960.2	1.6748	0.002175
Tlr12	1.66751	0.002751
RGD1564606	-1.65252	0.002419
RGD1562660	1.64503	0.0468811
Timd4	1.6285	0.0323708
Myo1g	1.62352	0.0002038
Atf7ip2	-1.62147	0.007313
Itgal	1.61858	1.037e-07
C6	1.60444	0.006202
Spn	1.57374	4.152e-05
Cd247	1.56579	0.007563
Cd300a	1.55562	0.003653
Tlr11	1.55502	0.002537
Evi2b	1.52589	1.428e-05
Slc14a2_2	1.52325	0.0128108
Bco1	-1.51514	0.006895
AABR07062183.1	1.50888	0.002419
Grp	1.50217	0.0167242
Il18rap	1.5021	0.005309
Cd33	1.49845	6.133e-05
AABR07065124.1	1.49554	0.0134395
Trem2	1.4908	0.0004101
LOC499229	1.47938	3.372e-05
Il21r	1.47688	0.002282
RGD1561778	1.46837	0.0380333
Sectm1a	-1.44553	0.0430261
Ccl3	1.44396	0.002298
Clec12a	1.43773	0.002947
LOC102549869	1.43481	0.005266
Ccr5	1.43397	4.41e-06
RGD1559459	-1.42735	0.0400934
Clec9a	1.42172	0.0004242
Tmem71	1.41619	0.005899
Pcdhb6	1.41555	0.0339771
AABR07030630.1	1.40867	0.00153
Sash3	1.4079	0.0001823
Pld4	1.40466	1.037e-07
Agtr1b	1.40172	0.0298278
Cxcr3	1.38706	0.0128108
P2ry10	1.38615	0.005856
Cd2	1.38256	0.0251706
Parvg	1.37513	0.0002636
Serinc2	-1.3709	0.0156438
Fcgr2b	1.3663	0.0003785
Cp	1.36357	2.416e-09
Edn2	1.35657	0.042429
Ace2	1.35423	0.002274
Ptprc	1.35228	8.708e-06
Bin2	1.35158	9.981e-05
Stab2	-1.34599	0.0166417
Lilrb3a	1.34432	0.003811
Ms4a4a	1.34294	0.002282
AABR07007584.3	1.33793	0.0430261
Ly49si1	1.3303	0.0296746
Igsf6	1.31843	0.0001483
Itgad	1.31351	1.801e-05
Cxcr6	1.31204	0.0396971
Lilrb3l	1.30987	0.0128108
Agr2	-1.30616	0.0146491
Cd6	1.30385	0.005853
LOC100911796	1.30289	0.0106507
Gal	-1.2964	0.006682
Gpr174	1.29561	0.0226033
Clec4a1	1.29437	0.0003684
Plek	1.2875	1.39e-05
Ccl2	1.28733	0.004899
Nckap1l	1.28391	3.06e-07
Cd300lf	1.28304	0.006377
AABR07005779.2	1.28108	0.0164971
Pipox	1.281	0.0174528
Atf3	-1.27843	3.336e-06
Adora3	1.26239	0.0298278
Nfam1	1.26169	5.53e-05
Cd53	1.25977	5.653e-06
Ly86	1.2578	0.0004678
Egr3	-1.25482	0.0240454
Gpr65	1.25212	0.0167242
Itgb2	1.2512	0.0004025
Ccl7	1.25017	0.0310449
Fyb	1.24977	1.614e-07
Rn50_2_2279.4	1.24226	0.04725
Slamf7	1.24112	0.0199242
Ikzf1	1.23598	0.0003826
AABR07027137.1	-1.23324	0.0337202
Cnn1	-1.23297	0.0336031
Tlr7	1.23078	0.0005884
C1qa	1.23045	3.42e-07
Laptm5	1.22615	1.293e-05
Gpr183	1.22536	6.103e-05
Dnai2	1.22388	0.0006237
Ms4a6e	1.22163	0.0320496
Tlr9	1.21544	0.0189964
Samhd1	-1.21475	0.0404528
Agtr2	1.21416	0.0241871
Wdfy4	1.21409	0.0003705
Cybb	1.20456	2.257e-06
Clec7a	1.2013	0.0003143
Cd37	1.19803	0.001487
Was	1.19156	0.001729
Myo1f	1.18893	0.0001211
Vegfd	1.18701	0.002751
Clec5a	1.18615	0.0315799
Lilra5	1.18611	0.007112
Klra2	1.18463	0.004109
RGD1565785	1.1827	0.0484395
RT1-DMb_1	1.18141	0.0007937
Mal	-1.17717	0.014451
Tlr13	1.1713	0.0005852
Fcer1g	1.16916	2.142e-05
Cd180	1.16879	0.005899
Gpr171	1.16663	0.0185194
Lcp2	1.16499	0.000113
Acbd7	1.16442	0.0100545
Tnfsf13b	1.1638	0.0128108
Hcls1	1.15967	0.0001939
Tlr10	1.15849	0.0197569
Ccl5	1.15815	0.0478336
Cd226	1.15727	0.013352
Tbxas1	1.15585	0.001108
C4a_2	1.14877	0.000517
Dock2	1.14737	0.001729
C1qb	1.13512	1.805e-06
Tnfaip8l2	1.13274	8.808e-05
Tagap	1.12971	0.0105947
Ms4a6a	1.12824	0.0121709
Csf2rb	1.12524	0.006847
Prss32	-1.12159	0.0408489
C3ar1	1.12135	0.007719
Lyz2	1.11728	0.001102
LOC691141	1.11566	0.0221494
Slamf9	1.11353	0.0254918
Aif1	1.11131	1.976e-05
Ptprcap	1.10707	0.0112154
LOC308990	1.10503	0.0137785
Tifab	1.09864	0.00775
Slc2a5	1.0981	0.006993
Arhgap45	1.09674	0.0002006
Clec4a3	1.09592	0.0108526
Cd101	1.09589	0.0496199
Pstpip1	1.09531	0.0128015
Adgre1	1.08769	0.0001939
Fcgr1a	1.08535	0.001313
P2ry12	1.0825	0.005775
Sh2d4a	-1.08056	0.0301992
Gpr84	1.08049	0.0160878
Cd200r1	1.08026	0.0235778
Slamf8	1.07928	0.001672
Ms4a8	-1.07762	0.0240246
Itk	1.07665	0.001775
Ncf1	1.07537	7.546e-05
Cyp11b2	-1.07244	0.0134395
Bcl2a1	1.07048	0.0172118
Cyth4	1.06844	0.0001792
Olr1	1.06573	0.0236167
Inmt	1.06473	0.002282
Cyp2d1	1.06421	0.018432
Il10ra	1.06149	0.004923
Serping1	1.05931	1.075e-05
Slc11a1	1.05494	0.005775
Nlrp3	1.05458	0.00851
Tlr8	1.04704	0.0131498
RGD1309362	1.04662	0.001729
Mefv	1.04498	0.0254918
Hs3st6	-1.04488	0.014624
Napsa	1.04414	0.013372
Lyl1	1.04308	0.003186
RGD1305298	1.04244	0.004103
Ncaph	1.03977	0.0131495
Gpr34	1.03853	0.011701
Rasal3	1.03766	0.006054
Hhatl	-1.0369	0.0111443
Cx3cr1	1.0364	0.001816
C1qc	1.03565	4.36e-05
Vav1	1.03489	0.005039
Gfra3	1.03214	0.0387717
Abcg3l3	1.02883	0.009772
Tnfrsf26	1.02591	0.003904
Tyrobp	1.02143	0.0005636
Hck	1.01821	0.003584
C1s	1.01619	0.0002064
Fam150b	1.01219	0.040509
Klhl6	1.01074	0.001677
Gdf15	-1.00935	0.001775
Cntnap5b	1.007	0.0112614
AABR07002677.2	1.00586	0.0313843
Card11	1.00547	0.003176
Pik3cg	1.00546	0.001729
Spi1	1.00505	0.002175
Pik3r5	1.00109	0.009017
Piezo2	0.998778	0.0118999
Epsti1	0.998302	0.0118707
P2ry6	0.996866	0.006956
Nr4a1	-0.995748	0.004606
Lat	0.995167	0.0448888
Gpr18	0.986253	0.0469582
Btk	0.983592	0.0478336
Col6a5	0.98059	0.007242
C5ar1	0.978801	0.0131498
Il2rg	0.974568	0.0155651
Fgf2	0.969906	0.001186
RGD1565166	-0.969695	0.0339771
Evi2a	0.968927	0.002537
AABR07006310.1	0.962817	0.002353
Itga4	0.960893	0.0146491
Atp7b	0.956341	0.0217242
Dennd1c	0.95079	0.0336577
Fermt3	0.946888	0.001337
Naip6	0.946217	0.042989
Sall1	0.945099	0.0301992
Wdr97	0.940446	0.0240525
Scube1	0.939089	0.0003511
AC125248.1	0.935567	0.044851
Arhgap9	0.934604	0.0128108
Coro1a	0.934351	0.004144
Ass1	-0.933772	0.004895
Rpe65	-0.933179	0.0283119
Lrrc25	0.929858	0.0133589
Angpt1	0.927041	0.006141
ENSRNOG00000059750	0.925431	0.018069
Tle6	-0.921763	0.003941
Sppl2a	0.920632	8.708e-06
Cilp	0.918198	0.0167242
Hlx	0.916931	0.0172016
A2m	0.913104	0.001186
Wisp1	0.912184	0.0131498
Itgax	0.911215	0.0313843
Arhgap30	0.908008	0.0223114
Rubcnl	0.903345	0.0278916
Cdk1	-0.900811	0.044902
NEWGENE_1308171	0.900243	0.0128015
Mthfd2	-0.895856	0.004109
Socs3	0.889771	0.006039
Hr	-0.88931	8.994e-06
P2rx7	0.885105	0.0342473
Spp1	0.882528	0.0008583
Inpp5d	0.882187	0.001258
Cfb_1	0.880628	0.0188661
Adamtsl3	0.86834	0.0431009
Sctr	-0.867236	0.0240525
ENSRNOG00000059237	0.866624	0.002175
Abi3	0.862109	0.011701
Igfbp3	0.861719	0.004255
Etv4	-0.854968	0.0001843
Ednrb	0.851959	5.514e-05
Agtr1a	0.846354	0.0374842
Cfp	0.844204	0.002175
Csf2ra	0.843587	0.009772
Jak3	0.84113	0.0002312
St8sia4	0.839741	0.0480849
Tmem106a	0.838319	0.0091
Stab1	0.835469	0.0189433
Lrrc15	0.835415	0.0430261
Pcdhgb6	0.834097	0.0005636
Cd4	0.830305	0.006421
Ednra	0.829991	0.0002384
Tspan11	0.827828	0.0298278
RT1-Da	0.824421	0.002429
Apbb1ip	0.821116	0.0150622
Serpine2	0.813609	0.0135113
RT1-Bb	0.812601	0.0129235
RT1-Ba	0.809319	0.005052
Cd74	0.80786	0.002419
Gimap9	0.805145	0.0253595
Cmklr1	0.804312	0.0404528
Lcp1	0.80415	0.004679
Sh3tc1	0.803897	0.0188258
AABR07019083.1	0.802079	0.0408489
Aplnr	0.79867	0.0298278
Map4k1	0.798255	0.0192837
Mlc1	0.796159	0.0175358
Akr1c14	0.787985	0.0458964
Exoc3l2	0.780759	0.0128108
Npas2	-0.778604	0.006031
Penk	-0.777114	9.888e-05
Rpl17	-0.774487	0.0129569
Ticam2	0.768584	0.0176609
Csf1r	0.760138	0.0002312
Fam167b	0.759502	0.0475371
Nfil3	-0.748148	0.005899
Irf8	0.747546	0.0197791
Scn7a	0.746451	0.0301726
Akain1	-0.744702	0.0217242
Kcnip2	-0.743309	0.0212671
Cartpt	-0.742788	0.001767
Vgf	-0.7401	0.0240454
Pik3c2b	-0.738303	0.018069
Msh5	0.738241	0.0404528
Tspan4	0.738156	0.005039
Kcnh6	0.734974	0.009871
Ciart	0.732717	0.0252881
Cks2	-0.731815	0.0427293
Vsir	0.729607	0.020601
Rtkn2	0.728534	0.0301203
Mmrn2	0.725529	0.005052
Adgre5	0.725175	0.0242086
Ypel4	-0.723179	0.003785
Dclre1c	0.712547	0.0402068
Chodl	0.708689	0.0391944
Rn50_3_1467.1	0.708354	0.0375739
Adcy4	0.704046	0.0451927
Galns	-0.703968	0.0281999
Cdh19	0.702772	0.0180562
Vwf	0.701868	0.005108
Slco2b1	0.701725	0.0166417
Bdnf	-0.701038	0.0306318
Irak2	-0.69937	0.0433644
Ctsz	0.698438	0.004144
C1ql3	0.698276	0.008676
Impg2	0.698068	0.0254918
Fli1	0.69244	0.0263772
Dtx4	-0.691817	0.0221494
Pls1	-0.690297	0.0260041
Cxcl14	-0.683528	0.000891
C1r	0.680521	0.0188609
Rps6ka2	0.677146	0.004144
AABR07058976.1	0.672652	0.0370901
Nkd2	0.670963	0.0370901
Eef1e1	-0.67048	0.007563
Zfp385b	-0.66581	0.001286
Plvap	0.663462	0.0247062
Pcdhga9	0.658653	0.0194557
Pnpla3	0.657802	0.0409252
Egfl7	0.650936	0.006188
Adam1a	0.649812	0.0402068
Lpxn	0.649275	0.0187676
RT1-A1	-0.647924	0.0221494
RGD1309995	0.647745	0.0001792
Dennd4a	0.641463	0.00658
Dock8	0.6284	0.0252881
Syt12	-0.627311	0.0034
Mest	0.625907	0.005912
Per3	0.622463	0.0278916
Eng	0.612358	0.0328834
Ciita	0.611533	0.0431009
Per2	0.606245	0.0200946
Unc93b1	0.604389	0.0235778
AABR07043748.1	-0.601638	0.006191
Icam1	0.601574	0.0263772
Fam105a	0.594829	0.0482881
Plxnd1	0.589836	0.0106507
Haus5	0.587889	0.0182771
Cdt1	-0.587766	0.007719
Dhcr24	-0.585881	0.001616
Angpt2	0.584723	0.0497278
Eif5b	0.563637	0.0167242
Dbp	0.560929	0.0263585
Csf1	0.556051	0.006542
Mvd	-0.55385	0.002778
Dock10	0.549991	0.0221494
Pde5a	0.546602	0.0298018
Nptx2	-0.546211	0.0419792
Idi1	-0.54475	0.009772
Cyp51	-0.53664	0.0189964
Slc1a4	-0.532036	0.035188
Fasn	-0.531333	0.0148012
Clp1	-0.527875	0.0106958
Sema6d	0.523663	0.005775
Cd48	0.52037	0.044851
Ldhb	-0.512138	0.0167242
Wrap53	-0.507302	0.0141097
Msn	0.504569	0.0468358
Ubtd1	-0.498766	0.0128108
Pdcd5	-0.497528	0.0494244
Med24	0.493335	0.0365317
Hmgcr	-0.487172	0.0400934
Hmgcs1	-0.486122	0.0301237
Fdps	-0.483512	0.0148792
Ahsa1	-0.477116	0.0142199
Aacs	-0.47644	0.011773
Tmem176b	0.473919	0.0468358
Daglb	-0.455508	0.0328834
Med20	-0.443452	0.0268344
Arhgap29	0.442226	0.0237109
Ttll12	-0.437954	0.0240246
Pbx3	0.436821	0.0160878
Mfap3l	0.43605	0.0336577
Fam188a	-0.432117	0.005408
Desi1	-0.429935	0.0248737
Nr1d2	0.426705	0.0417881
Zfp746	-0.411831	0.006749
Msmo1	-0.403121	0.044851
Cep164	0.40075	0.0398761
Vav2	-0.398637	0.0254701
Suox	-0.395835	0.0252881
Pcyt2	-0.375141	0.0345481
Mtmr1	-0.346411	0.0370901
Nr3c1_1	0.335291	0.0431009
