# Supplementary material for: Comprehensive transcriptomic analysis reveals canonical and novel pathways modulated by nanoceria in mammalian retinal degeneration
Source: Research Square preprint supplement (doi:10.21203/rs.3.rs-7456023/v1), 2025-10-25
Supplement: Supplementary file 2 [file 4babd25d587483c1be665081.xlsx]

## Sheet: Table_S10_Curated_NonCanonic
Module	Gene	LD_vs_CTRL_log2FC	LD_vs_CTRL_FDR	VEH_vs_CTRL_log2FC	VEH_vs_CTRL_FDR	NANO_vs_CTRL_log2FC	NANO_vs_CTRL_FDR	VEHLD_vs_LD_log2FC	VEHLD_vs_LD_FDR	NANOLD_vs_LD_log2FC	NANOLD_vs_LD_FDR
Urea_cycle	ASS1	-0.0774889	0.895952	0.0984546	0.999489	-0.933772	0.004895	0.0984546	0.785569	-0.933772	0.980328
Urea_cycle	CPS1	0.699608	0.391744	-0.0520233	0.999629	0.0494714	0.98621	-0.0520233	0.663487	0.0494714	0.817809
Urea_cycle	OTC	-0.163265	0.842421	-0.179673	0.999489	-0.646006	0.457413	-0.179673	0.828564	-0.646006	0.668412
Urea_cycle	ARG1	-0.0329445	0.971994	0.0792702	0.999629	0.0387741	0.97903	0.0792702	0.665639	0.0387741	0.825606
Urea_cycle	ARG2	-0.622265	0.001102	-0.0301414	0.999629	-0.142367	0.783129	-0.0301414	0.0112964	-0.142367	0.005463
Insulin_glucose	INSR	-0.149638	0.417347	0.0337841	0.999489	0.0127953	0.982326	0.0337841	0.738404	0.0127953	0.671953
Insulin_glucose	IRS1	0.290265	0.133586	0.183417	0.999489	0.16564	0.686294	0.183417	0.307613	0.16564	0.43434
Insulin_glucose	SLC2A4	-0.614358	0.268915	-0.519744	0.999489	-0.12867	0.921064	-0.519744	0.162475	-0.12867	0.570496
