# Supplementary material for: Comprehensive transcriptomic analysis reveals canonical and novel pathways modulated by nanoceria in mammalian retinal degeneration
Source: Research Square preprint supplement (doi:10.21203/rs.3.rs-7456023/v1), 2025-10-25
Supplement: Supplementary file 3 [file 5db2d2c662dedebe93c8ec9f.xlsx]

## Sheet: Table_S4_VEHLD_vs_LD_DEGs
Gene	log2FC	FDR
Gdf1	-9.2257	5.805e-05
Hsp90aa1	8.43444	2.458e-05
Hprt1	8.39903	0.007022
Olr1641	6.82146	0.0144581
RGD1563072	5.87697	0.0101529
Usp9y	-5.75084	0.0183888
AABR07065815.1	-5.69463	0.0194399
LOC102549714	5.1787	2.945e-18
Rn50_15_0408.6	5.16546	1.601e-06
LOC102556337	-4.99174	0.0005048
Impad1_1	-4.91802	0.002858
ENSRNOG00000057618	4.53243	0.0132601
RGD1562652	4.34126	0.006232
Acnat1	4.10092	0.0460314
Lao1	4.06978	0.005503
Arl9	3.89303	0.008365
RGD1564463	-3.42698	0.001325
Bpifa6	-3.40219	0.0117459
Olr1588	3.19331	0.0227576
Tpo	3.06433	0.009783
AABR07024869.1	2.9728	0.0273447
LOC103691893	2.85631	0.001427
Clec4e	2.73652	7.708e-08
Orm1	2.70836	0.002404
Hamp	2.69155	0.0178751
Adad1	-2.67568	0.001613
AABR07015917.1	2.66205	1.51e-11
Nxpe5	2.65153	0.0003681
Mmp8	2.59848	8.31e-05
Cnmd	-2.57178	0.0220592
AABR07035506.1	2.53868	0.0346834
Vsig4	2.53766	0.007148
ENSRNOG00000049870	2.49835	0.002725
Actg2	-2.41723	6.148e-21
Gzmb	2.33415	0.0005121
AABR07049783.1	2.31857	0.0250397
AABR07048322.1	-2.29589	0.0344301
AABR07044551.1	2.24856	1.615e-11
Hhla1	2.23709	0.0160754
Sptlc3	-2.23573	0.0178751
Gpr33	2.23449	0.023263
Rn50_20_0045.4	2.16841	0.004017
ENSRNOG00000056059	2.15437	0.023035
Acot12	2.12128	0.001408
RGD1564937	2.11217	0.0140368
AABR07061134.1	2.0906	0.0301065
Acod1	2.08957	0.0121994
RGD1562540	2.0782	0.0143073
Ms4a4c	2.07098	2.778e-07
Skor1	2.02121	0.003436
LOC100360933	-2.01659	0.0436583
Lalba	-2.0126	0.0212308
Prok2	1.9946	0.0231479
Scn10a	1.9761	0.006485
AABR07047576.1	1.95462	0.0171978
Cyp17a1	1.93909	0.0465366
LOC497796	1.92099	0.0003993
Lilrb4	1.90951	1.582e-10
Siglech	1.88027	0.0002062
AABR07018226.2	1.84559	4.449e-05
Klra5_4	1.81853	0.004842
LOC100910138	1.81304	0.0244116
Cxcl11	1.81155	2.008e-24
AABR07039203.1	1.80409	0.0250612
LOC500712	1.78326	1.108e-11
Setsip	1.78105	0.007692
Acsm4	1.77273	0.006052
LOC100360575_1	1.75095	0.0138811
LOC100911101	1.73831	0.008989
RGD1565212	-1.69079	0.0169788
AABR07072028.1	1.64144	0.0215799
LOC100909671	1.63915	0.00835
Il17rb	1.62096	2.821e-27
Ttc24	-1.62033	4.31e-20
Fcnb	1.60065	1.387e-15
Insl3	-1.59916	0.0122786
Gpr141	1.59346	0.008025
Nupr1l1	-1.57126	0.0252183
AABR07012331.1	-1.51718	0.0296648
Patl2	1.49903	0.037729
Rec8	1.49887	0.003785
Lilrb3	1.49689	0.0427401
Ibsp	1.49033	0.022658
Serpine3	-1.48089	3.011e-05
Glp1r	1.4758	9.79e-05
Mpa2l	1.46934	5.724e-07
AABR07065792.1	1.45916	0.0234901
LOC103690139	1.42684	0.022199
RGD1309291	-1.39905	0.0337983
Cask	-1.39492	0.0474091
Chi3l1	1.3842	5.983e-42
Arl14	-1.38216	0.002459
Clec4d	1.37066	2.557e-16
Scgb3a1	1.36849	4.669e-05
Serpina1	1.35862	1.488e-05
Pdcd1	1.35143	5.769e-06
RT1-CE16_1	1.34919	0.0100211
LOC24906	1.34508	3.778e-09
Tectb	1.34447	3.268e-07
LOC690020	1.3434	0.003319
Hk3	1.33754	2.556e-05
Muc16	-1.33279	0.0160046
AABR07027015.1	-1.32893	0.0394353
Cnn1	-1.3107	9.774e-05
Clec4b2	1.30188	0.0005121
Stk31	1.2893	0.0183368
Mmp7	1.2867	1.852e-05
AABR07070581.1	1.28599	3.73e-13
Gcsam	1.28515	0.0001156
Loxhd1	1.28013	0.003184
Gfap	1.26174	4.201e-11
Kng1	1.26041	6.337e-12
Nlrp1a	1.25955	0.001093
Rnase2	1.25828	0.0001305
Sftpa1	1.25549	5.109e-05
Ccl3	1.24774	2.641e-51
LOC108349682	-1.24299	0.001927
Fcrl3	1.24165	0.0008395
Dnah8	1.23686	0.0232712
Ccl12	1.23335	1.85e-21
LOC100910526	-1.22973	0.0106201
Rtdr1	1.19574	0.007886
Ceacam4	1.18687	0.0140971
Slc22a3	-1.18382	2.108e-05
LOC100910483	1.17246	0.0290556
Galp	1.16594	0.001225
LOC685157	1.1635	0.003536
AC128059.3	1.15876	0.0306396
AABR07005569.1	1.15712	0.001096
Csf3r	1.15471	6.108e-11
FAM187A	1.15155	2.488e-05
Ccl4	1.13981	8.078e-26
RGD1564345	1.13458	0.0247442
AABR07024869.2	1.13431	0.0108933
Hspb9	1.13423	0.004489
Cxcl13	1.13388	1.566e-13
Dll3	1.13019	0.0483869
Cd300a	1.12736	6.895e-06
LOC100362110	1.1238	0.009471
Rnase11	1.11995	0.008284
Fcgr3a	1.11608	1.36e-08
LOC103692570	-1.10808	0.0204359
C6	1.10248	0.008759
S100a8	1.09699	0.0006675
Xcr1	1.09192	0.0262857
Hhatl	-1.08732	1.331e-08
Shox2	-1.08237	0.0001099
Ly9	1.07854	0.001563
Dnah9	1.07623	0.001468
AC127640.1	1.07529	0.0115302
Ccr4	1.06193	0.0214695
Col1a1	-1.056	0.009333
Mmp10	-1.05033	0.002484
RGD1561778	1.04967	4.907e-10
RGD1560281	1.04596	0.0007717
Kmo	1.041	5.647e-05
Pate4	1.03664	2.85e-06
LOC500148	1.03514	5.137e-09
Trat1	1.0251	0.002538
Tagap	1.02372	6.815e-07
Tlr12	1.01505	0.0240422
Ms4a6c	1.01284	1.233e-06
Sh2d2a	1.01045	0.009826
Il19	1.00905	0.0246371
Ccl2	1.00501	8.904e-86
LOC100359752	0.995569	0.0082
Kcnmb3	0.989917	0.009584
LOC681325	0.973864	1.103e-11
AABR07062183.1	0.971397	0.0480868
Sall1	0.969254	0.008405
AABR07043085.1	0.967787	0.0279237
Gh1	-0.965297	0.0416613
Krt1	-0.96462	0.0181613
Tmem52b	0.962746	0.03481
Lnpep	0.955388	0.0480879
AABR07015015.1	-0.951526	0.006157
C3	0.950693	1.834e-05
Vit	0.945086	0.0167474
Cxcr3	0.941787	0.0406425
Nek10	0.941489	0.0005091
Rn60_20_0039.20	-0.935624	0.0437348
RGD1561730	0.934653	0.0127169
Clec9a	0.929505	4.298e-05
Pck1	-0.928881	0.0298476
Stfa2	0.92357	0.002087
LOC100911215	0.91802	0.007133
Cxcl10	0.916076	4.58e-40
AABR07002001.1	0.911746	0.004858
Cfap157	0.909274	1.568e-11
Sit1	0.906906	0.003825
Chst13	0.901458	0.0479075
AC128960.2	0.893585	8.833e-07
AABR07017902.1	0.893121	0.0003616
NEWGENE_621351_2	-0.891759	0.0195117
AC125248.1	0.889476	8.857e-08
Icos	0.886567	0.0137971
AABR07065124.1	0.885664	3.719e-17
Ldhc	0.885653	6.57e-09
Gpr31	0.884168	0.0115194
Iqcf1	0.881531	0.0483494
NEWGENE_621351_1	-0.880635	0.0484617
Myo1g	0.877573	7.165e-08
Pkd1l1	0.872157	0.007817
Angptl8	-0.866924	0.0208584
RGD1309362	0.865758	0.006762
Slc14a2_2	0.865151	0.005831
F10	0.862317	6.921e-10
Edn2	0.860295	9.275e-29
Tceal7	-0.859303	0.0116007
AC121415.1	0.859273	0.0174577
Kcnmb1	-0.859106	0.0001534
Cpa1	-0.858472	0.001372
Pipox	0.856841	0.005693
AABR07012274.1	-0.850482	0.0122113
Zg16	0.844464	0.0235286
Abcg3l3	0.842588	0.002029
AC103292.1	0.842425	3.236e-05
Jchain	0.841843	0.0003585
Cd3e	0.836926	0.0006554
Ms4a4a	0.832531	2.26e-07
LOC681341	0.831817	2.339e-07
AABR07007584.3	0.830932	0.0265641
Cd8b	0.825993	0.0001105
Gdf15	-0.82568	1.65e-36
Fbxo39	0.825149	0.0002357
Lilrb3l	0.819063	4.458e-05
RGD1561143	0.814205	5.607e-05
AABR07022113.1	0.812335	0.005014
Serpinb2	-0.811815	0.001346
LOC102554500	0.811353	0.0161057
Rn60_20_0069.2	0.808267	2.248e-08
Wee2	0.805475	1.018e-06
AABR07021804.1	0.805454	0.0006929
Mmp3	-0.802895	0.0002143
Cd84	0.800366	0.0480879
S100a9	0.797018	1.313e-05
Il1b	0.794957	1.113e-10
Cct8l1_2	0.793628	0.0005758
Npas4	0.792736	2.341e-20
Siglec1	0.791357	0.002848
Sh2d1b	0.788062	0.002026
LOC100909836	-0.787527	0.007769
AABR07030791.1	0.774763	0.0349213
Cd300lf	0.774165	0.00759
Il18rap	0.770328	1.1e-06
Itk	0.770327	3.932e-21
Tas1r3	0.764794	0.0121562
Cst7	0.763252	2.777e-06
Il11	0.762346	5.812e-06
Cyp11b2	-0.761032	0.0002914
Mnda	0.759812	9.298e-12
Ccl5	0.759161	0.0103425
Ccdc73	0.753255	0.006453
Lilrb3a	0.752521	6.631e-06
LOC100360238	0.75192	9.509e-12
C4a_2	0.750438	1.974e-10
Cldn6	0.745868	0.00119
Spn	0.739593	0.0007111
Ankar	0.739195	0.003353
Nr5a1	0.736013	4.406e-05
Mthfd2	-0.734398	1.544e-06
Gpr171	0.733534	0.0002628
Cpz	-0.733468	0.0003815
Igsf6	0.733401	0.001563
RT1-DMb_1	0.733375	0.0004753
LOC102550392	-0.73049	0.005644
Cd33	0.729904	0.001238
Ms4a6a	0.729847	1.248e-21
Bdkrb2	0.727598	2.681e-12
Sstr3	0.725257	0.0317373
Thbs1	-0.719914	0.0101282
Dnajb7	0.719019	4.232e-05
Rpe65	-0.717905	0.0003169
Lrrc15	0.716611	6.775e-37
Atf3	-0.712611	6.981e-38
Il23r	0.710151	2.573e-26
C3ar1	0.709715	5.513e-05
AC121220.1	0.705623	0.0164323
Krt71	-0.704915	0.0436302
Cpg1	0.702583	4.216e-06
LOC102548013	0.700758	0.001655
H1foo	0.699622	4.261e-07
Ces1f	-0.698876	0.001493
C4b	0.698262	0.0003047
LOC103689943	0.69584	0.004908
Gpr132	0.688017	0.003399
AABR07063893.1	0.686355	0.0484251
Adam12	0.684127	1.74e-09
Asgr2	0.683402	0.0453278
Amh	0.682959	0.0141078
Cebpd	0.682371	4.405e-40
Mcemp1	0.682291	8.594e-07
Tlr10	0.679915	9.839e-05
Igsf7	0.677002	0.00489
Trem3	0.673795	0.001861
AABR07017635.2	-0.672972	3.128e-06
Lilrc2	0.672828	5.65e-05
Ccr2	0.671025	0.0001336
Usp44	0.670284	0.001466
Fam71a	0.669854	1.833e-08
AABR07002870.2	0.666335	0.0462714
Clec5a	0.662273	5.023e-07
Ctsw	0.662131	0.0187969
Calca	0.6583	3.31e-15
Cd2	0.656157	0.0100619
LOC499229	0.6554	0.002978
AABR07058479.1	0.654899	0.006893
Dpep1	-0.654366	0.0170474
Itgal	0.654305	1.935e-06
Fcgr2b	0.652743	4.294e-22
ENSRNOG00000059237	0.64947	9.298e-12
P2ry4	0.647687	0.0008027
Clec4a1	0.646457	0.0107801
Mrgprg	0.645826	0.0004174
Cdh26	0.640744	0.0002644
Lrrc25	0.640155	6.622e-09
Cd53	0.639749	3.038e-06
Kcnip2	-0.639451	3.172e-06
Hrh1	-0.639043	0.004529
Cd6	0.637467	0.001366
Olr1106	-0.637291	0.0001743
LOC680910	0.636105	1.991e-06
Ifit1	-0.633784	0.0033
RGD1565355	0.632427	6.448e-08
Gpr65	0.631368	2.408e-05
Cenpf	-0.630808	0.0211593
AABR07052897.2	-0.62873	0.0237876
Sash3	0.628118	4.914e-05
Gjc2	0.628109	0.005482
Mt1m	0.624568	0.0005971
Cd200r1	0.621271	7.5e-06
Trim69	0.621258	1.456e-10
Cp	0.620562	6.236e-32
Tmem237	0.619568	0.0005955
Tle6	-0.61956	0.0119609
AABR07036542.1	0.618596	0.0001109
RGD1564606	-0.61693	0.011791
Tnfaip8l2	0.616191	0.002591
Clec12a	0.61518	0.0106916
Fgf2	0.615125	1.147e-34
Msh5	0.613596	0.0002904
Cdkn3	-0.613358	0.001823
Il6	0.613067	7.046e-23
LOC691141	0.612768	5.159e-06
Spib	0.611761	0.005179
Clec2d2	0.611118	0.0195117
Tlr7	0.610052	7.657e-06
P4ha3	0.607705	0.0480879
Bcl2a1	0.606088	0.0001717
Maats1	0.605879	0.0388815
AC139642.1	0.602983	0.0178308
Spc25	-0.602607	0.005269
Cxcr2	0.601913	2.189e-05
Prmt6	-0.601505	0.006802
LOC102553715_2	-0.601297	0.00125
Depdc1	-0.59928	0.0495299
Hck	0.597566	1.476e-09
Lyz2	0.596939	0.009584
Oscar	0.593978	0.006052
Pcdhga11	0.591881	0.0002196
AC109891.1	0.591402	4.317e-05
Ect2	-0.590316	0.0146022
Htr1f	0.586962	0.003284
Nkx3-2	-0.585836	0.0498781
Caprin2	0.584908	0.008178
AABR07021762.1	0.582811	0.0366107
Sell	0.578346	4.002e-07
Gpr84	0.574724	6.48e-15
Mpp4	0.574041	0.0174921
C1qb	0.573034	4.229e-08
Hr	-0.572747	0.0003684
Fcer1g	0.572365	5.243e-09
LOC689899	-0.572049	0.0221015
Oas1e	-0.570791	0.0004616
Syce3	-0.569049	1.343e-05
AABR07013410.4	0.566968	0.006806
Lcp2	0.565816	9.828e-07
AC128836.1	-0.563633	0.009301
AC142181.1	0.562653	0.0409535
Cyp2c11	0.562231	0.004437
Tnfsf13b	0.560186	3.185e-07
Cd55	0.560163	0.0001598
Ikzf1	0.559755	6.829e-05
Pld4	0.559452	0.0002789
Ptprc	0.559351	2.385e-09
Pik3r5	0.558743	1.556e-07
Spi1	0.5573	3.635e-06
Ppp1r42	0.556999	7.857e-12
LOC100911104	0.555848	0.003399
Pcdhgb6	0.552786	3.185e-07
C1qa	0.552157	0.0008571
Plek	0.550406	1.96e-13
Lyc2	0.549366	0.0115923
Adgrf3	0.548152	0.0215157
Sox30	0.547836	0.0186945
Plg	0.547279	0.0237819
Cartpt	-0.545802	0.0144797
AABR07060628.1	0.544745	0.0498781
Marc2	-0.543125	0.002055
Cdc20	-0.543106	0.0224711
Btk	0.542578	0.0004523
Bin2	0.542195	0.0001749
Tfec	0.542019	0.006358
Ms4a6e	0.540159	1.988e-06
Mtcp1	0.540136	0.0415137
AABR07066529.3	0.539783	0.0137913
Fcgr1a	0.539434	1.606e-05
Hdac9	0.539405	0.005087
Smtnl1	-0.536507	0.0341452
Nilr1	0.534493	0.005686
AABR07044148.1	0.529981	0.0396944
Fosl1	0.528253	1.403e-74
Tyrobp	0.527783	7.769e-08
Tmem71	0.527368	0.0328566
Fyb	0.526243	1.182e-08
ENSRNOG00000034190	0.526202	0.0215157
Krt16	-0.525928	0.007006
Msr1	0.525348	1.729e-10
Dnai2	0.525162	2.845e-11
Arl5c	0.524909	3.874e-19
Rn60_1_2212.3	0.523983	0.0105478
Lvrn	-0.523289	0.036635
Maf	0.523175	0.0239739
L3mbtl1	0.522344	7.5e-06
Ms4a8	-0.521239	0.0002147
Olr1	0.521126	1.884e-15
Dock2	0.520325	0.0122132
Retnlg	0.520224	0.0004268
Angpt2	0.520201	0.0340315
Naip6	0.519759	0.0004844
Kcnj8	-0.517699	0.004891
Wdfy4	0.515869	6.375e-05
Lypd8	0.515713	0.02339
Fscn3	0.514827	0.001644
Sycp2	0.514316	0.0219079
Gbp1	0.513913	0.004065
Ccr5	0.512079	5.727e-10
Unc13c	0.511782	0.0348156
Creb5	0.511631	0.003602
Was	0.510274	0.006691
Clec4a3	0.510271	0.001708
Cybb	0.509971	3.954e-05
Ly86	0.508249	0.0336454
Uox	0.507348	0.007884
Spag8	0.504508	0.0376231
Ch25h	0.503446	3.871e-28
Dhh	0.503135	0.0001553
Fgfbp1	-0.500586	0.0261051
Myrfl	-0.500276	0.002612
Parvg	0.500262	0.001711
Has1	0.499696	2.418e-09
Pstpip1	0.499286	4.8e-05
Tlr13	0.498879	0.002003
Lyl1	0.498057	0.0129282
Gfi1b	0.496355	0.007522
Prim1	-0.494387	0.0463298
Mx2	0.49398	8.954e-13
Slamf6	0.493224	0.0120719
Tbxas1	0.493198	0.0003351
Cd8a	0.492948	3.769e-05
Slamf8	0.491322	1.261e-07
LOC100909605	0.489811	0.003766
C1qc	0.489387	0.0002318
AABR07058976.1	0.488371	0.0180887
Acrbp	0.488059	0.00799
Tmem106a	0.487618	1.67e-08
Cd247	0.487419	0.0100425
Synpo2	-0.486968	0.003926
Fgf23	-0.485103	0.00143
Dnmt3l	0.484789	0.0386286
NEWGENE_2319083	0.48463	0.0276759
Socs3	0.483434	1.532e-104
Myo1f	0.483161	0.003164
Itgb2	0.483128	5.335e-12
RGD1305645	-0.48126	0.0229647
Oas1h	0.481082	0.0004055
Napsa	0.481005	1.757e-05
Mroh2a	0.480272	0.006157
Il21r	0.479566	4.226e-06
AABR07060872.1	0.478247	2.245e-05
Sctr	-0.477913	2.769e-07
Mis18a	-0.477147	0.009383
Drd4	-0.476482	1.203e-06
Jak3	0.476303	4.445e-57
Vav1	0.47478	1.612e-06
LOC103690128	-0.473707	0.003972
Serpind1	0.473638	0.0323778
C1ql3	0.473325	9.588e-06
MGC105567	-0.473261	0.001922
Myc	-0.472639	3.925e-05
Csf2ra	0.472581	0.0005776
Tbx19	0.472277	0.004117
Nfam1	0.471934	0.0007392
Ptprcap	0.471447	0.0388793
Dennd4a	0.471234	1.839e-37
Angptl4	0.470229	2.155e-28
Mest	0.469989	3.028e-47
Hcls1	0.46988	9.922e-08
Rtkn2	0.469742	0.0213729
Itgax	0.469224	3.297e-15
Tk1	-0.468699	0.0491619
Rgs1	0.467383	0.0009187
Ahrr	-0.466568	0.0393305
Lst1	0.46652	0.000789
Itgad	0.466166	1.186e-13
Laptm5	0.46451	0.0001058
Pou3f1	0.464041	0.0201823
RGD1307182	0.463701	1.88e-06
Penk	-0.462804	0.0001669
Wnt5b	-0.46199	0.001166
Tmem108	0.461876	0.001422
Syt15	-0.460824	0.0174971
AABR07063901.1	0.46018	0.006511
Fabp3	-0.458125	0.0104611
Ednrb	0.45725	0.0009857
Mcm8	-0.457147	0.0184954
Per2	0.456641	7.709e-05
Samd5	0.454796	1.239e-05
Slc11a1	0.453771	0.0003212
Atp8b4	0.453021	0.000234
ENSRNOG00000050453	0.452027	3.981e-13
Impg2	0.450726	4.052e-07
LOC108348047	0.450587	1.614e-07
Ano3	0.450515	0.0480945
Fasn	-0.449701	0.001196
AABR07062775.1	0.449325	0.0249885
Clec7a	0.447982	0.0003212
Spp1	0.447538	3.653e-48
Prr32	-0.446065	0.006041
Aldh1l2	-0.445717	0.007678
Aqp6	0.444583	4.393e-07
Tcf24	-0.44442	0.00483
Eno4	0.444388	1.801e-07
Ptx3	0.444384	2.494e-27
Rasal3	0.442943	8.443e-05
Nckap1l	0.442889	0.0003212
LOC108348072	-0.442674	0.0414484
Klra5_3	0.442242	0.0409499
Csf2rb	0.442072	9.972e-25
Cd80	0.44092	5.701e-05
Vip	-0.440398	0.0449251
Mtcl1	0.437946	0.00125
Cc2d2a	0.437154	0.002493
Milr1	-0.437044	0.002647
Slc13a5	0.436789	2.022e-40
Mt2A	0.436625	4.966e-49
Rac2	0.436623	0.000288
Neurl3	0.43606	3.144e-05
Smco1	-0.435998	0.0436583
NEWGENE_6497122	-0.435965	0.003017
Snai3	0.435909	0.02339
P2rx7	0.433762	0.0267426
Glycam1	-0.433683	0.0002235
Ddn	-0.433032	0.0487062
Slfn4	0.432742	0.0006044
Il2rg	0.43201	8.259e-05
Gpr183	0.430819	0.0320515
Tff2	0.430685	7.532e-05
Acadsb	-0.430472	0.003125
Serping1	0.428807	4e-14
Yif1b	-0.428599	0.0007254
Fermt3	0.427548	3.956e-11
Pcdhga9	0.427528	2.148e-06
Akr1c14	0.427313	0.002468
LOC691196	-0.427255	0.0455609
Rgs9bp	0.426869	0.004853
LOC108348049	-0.425036	0.0103914
Mchr1	0.424751	0.0004773
Prg4	0.424568	0.0002604
Chd7	0.424505	7.825e-05
Dennd1c	0.423513	0.0126053
Pik3cg	0.420218	0.0003226
Cebpe	0.419417	0.002396
P2ry6	0.419251	2.436e-08
Ccr6	0.41814	0.0385728
Il10ra	0.417993	0.005781
Sntb2	0.417141	0.005484
AABR07047256.1	0.415635	0.0191794
Slc28a2	0.414981	0.004872
AABR07017253.1	0.413307	0.0297765
Ervfrd-1	0.411382	2.808e-05
Mrgprf	-0.410029	0.0162733
Nmral1	-0.407402	0.0435786
Ciita	0.407324	1.332e-05
Plxna2	0.406659	0.033506
Gja5	0.405739	0.004486
Zfhx2	0.405671	0.001232
Cox4i2	-0.404641	0.002017
AA926063	0.404563	3.576e-06
AABR07064867.2	0.404029	0.0150317
Ciart	0.403873	0.0342012
Zfp951_2	0.40332	0.0001486
Tnfsf8	0.40275	0.005411
Atp13a4	-0.402246	0.0100425
Tmem116	0.400492	1.19e-17
Daglb	-0.400116	0.0401496
Rlbp1	-0.399719	6.921e-05
Clca4	-0.39729	0.0207233
Cd163	0.397015	3.146e-17
Casp12	0.395996	0.005179
P2ry10	0.395348	0.0085
Aif1	0.393145	0.0104297
Prdm6	-0.391976	0.0121562
Clec4a2	0.391886	6.17e-05
Col5a3	0.389922	0.0009501
Apbb1ip	0.389377	0.003494
Doc2b	0.388769	0.0445492
Ubtd1	-0.388637	5.135e-15
Gbx2	0.386871	0.006347
Cry2	0.386794	0.0202263
Cxcl17	0.386372	1.1e-05
Col9a3	-0.385599	0.0143468
Adamts4	0.385052	1.939e-32
Adgre1	0.384377	0.004264
Gcat	-0.382375	0.0149283
LOC100911825	0.381863	1.157e-05
Galnt16	-0.381361	0.0001338
Slc1a4	-0.380298	0.0181578
AABR07006310.1	0.379734	0.001016
Rn50_13_0801.2	-0.379545	0.0005844
Hmgb2l1	-0.379198	3.236e-05
Mefv	0.377396	0.0006234
Ldlrad1	0.376906	0.001824
Rn60_8_0242.1	0.376195	0.004787
Gdf6	-0.375629	0.00874
LOC108351043	-0.375398	0.001941
Fos	0.374173	4.304e-18
Clspn	0.373837	5.413e-10
Col6a5	0.372595	0.0261079
LOC308990	0.372382	0.00535
Cx3cr1	0.371584	0.005664
Prtg	0.371512	6.959e-21
Lbp	0.371442	4.726e-07
Pitpnm3	0.371086	9.842e-23
AABR07063901.2	0.369861	8.152e-24
Ppef1	-0.369225	1.283e-17
Lcp1	0.368788	0.001164
Emid1	-0.36826	0.0130178
Cfb_1	0.367874	3.483e-19
Slc25a29	-0.367673	0.0199105
Ttk	-0.366855	0.0002616
Kcnk13	0.366633	0.00846
Tnfrsf26	0.366494	4.492e-08
Cd22	0.366378	0.0115194
Car14	-0.366162	5.149e-06
F2rl2	0.366081	6.906e-05
Rhoh	0.364916	0.009395
Folr2	0.364521	0.04541
Ptgs2	0.362587	1.04e-14
Opn1sw	0.361984	0.0195072
Zfp385b	-0.361983	4.092e-08
Dio1	-0.361772	0.0005728
Sla2	0.36089	0.003398
Rhpn2	-0.360801	0.008283
ENSRNOG00000042264	0.359362	0.0468871
Fgg	-0.359237	0.003662
Cxcl9	0.358348	0.017123
AABR07017846.1	-0.358292	0.0187728
Tmem196	0.358061	0.0121562
AABR07049799.1	0.357476	0.0219821
Slc44a5	0.356838	0.0413627
Aadat	0.356672	1.795e-05
Arhgap9	0.355094	0.001654
Sema7a	0.354862	3.758e-15
Slc10a2	-0.354712	0.0279237
Tfpi2	0.353597	0.0447488
Sesn2	-0.352918	2.489e-13
Arhgap30	0.352907	0.001372
LOC102553814	-0.352001	0.003533
Timp1	0.351186	8.651e-35
Treml2	0.350339	1.082e-05
Cyp4b1	-0.350077	0.0118559
RGD1309995	0.349922	0.007047
Foxn4	-0.349825	3.333e-11
Mrvi1	-0.349514	0.028256
Tnfaip3	0.349119	0.0005121
Nlrc4	0.348938	0.0144797
Cyth4	0.348891	1.279e-06
Siah3	-0.348891	0.0117779
Grin3b	0.348278	5.674e-05
AABR07013729.1	0.348133	0.0284945
Birc3	0.347543	0.0130268
Gstt4	0.345806	5.883e-07
Ifi44l	-0.344689	0.002459
Kcnj10	-0.34369	0.001286
Gbp2	-0.342119	0.0270968
Nr6a1	0.341923	0.00412
Dnah7	0.340942	0.0427787
Ncf1	0.340538	2.504e-05
Icam1	0.340436	1.218e-49
Adm	0.339093	1.463e-09
Cox7a1	-0.338991	0.0109533
Ncf2	0.338659	1.137e-06
Dmrta1	0.338601	9.902e-06
Gbp5	-0.337596	0.0226082
Cd40lg	0.337265	0.002807
Lmod1	-0.336361	0.006189
Eps8l3	0.336278	6.17e-05
Adgb	0.33499	0.003184
Hk2	0.334841	1.188e-10
Kif11	-0.334791	2.488e-22
Tnip2	0.333932	1.62e-33
Zfp516	0.333846	1.236e-28
Sh3tc1	0.333458	0.008972
Serpine1	-0.332905	0.002235
Tcp11l1	0.33265	4.936e-06
Usp18	0.332136	8.328e-13
Cep164	0.331179	0.017447
Mthfs	0.330767	0.0273905
Card11	0.330229	0.0121562
Fuom	-0.33012	0.0447488
Cfp	0.329378	0.0147745
Ttc16	0.329109	0.0003006
Lat	0.328389	0.0115275
Desi1	-0.328199	0.001874
Stard9	0.328179	0.011606
Shisa3	-0.327096	0.0147773
Ccdc184	-0.326666	0.0341452
Dclre1c	0.326267	0.007974
Coro1a	0.326209	0.0003287
Clec2l	-0.326128	0.006806
A2m	0.325297	1.929e-14
AABR07027431.1	0.325239	0.001691
Glipr1	0.325209	0.010118
Pde6g	0.324973	0.000497
Hlx	0.324039	0.0186945
Acat2	-0.324007	0.0002652
C1s	0.323755	2.846e-08
Slc15a3	0.323577	0.0004268
RGD1559482	0.322953	2.239e-06
Med20	-0.322947	0.0120543
Epsti1	0.321663	0.01463
Siglec8	0.32074	0.0200167
AABR07016578.1	-0.31896	0.0004816
Slitrk2	0.318307	0.008234
Icam4	0.317916	8.64e-06
Dhcr24	-0.317509	0.006801
Nfkb2	-0.317405	0.001181
Prdm9	0.317149	0.0452527
Ccl7	0.317107	2.641e-51
Nr1d1	0.31685	6.85e-06
Slc4a7	0.31666	5.024e-07
Cd99l2	-0.316527	0.006691
Abca1	0.31648	0.002194
C5ar1	0.316059	4.937e-06
Itsn2	0.316001	0.001389
LOC362863	0.315919	0.004912
LOC498154	-0.315554	0.0471058
Esrrb	0.315245	2.778e-12
Kctd10	-0.314682	0.007369
Rsad2	-0.31389	1.712e-14
Rgs20	0.313624	0.0003777
Pcdhgb4	0.313058	0.0002621
Adam1a	0.312704	1.101e-08
Vash1	0.311817	0.0415566
Epb41l2	0.311692	0.001518
Nlrp3	0.311369	2.784e-05
Rps6ka2	0.31131	2.573e-26
Saxo2	0.311196	0.004023
Egfl6	-0.31084	0.001501
Ldlr	-0.310556	0.004417
Wfdc18	0.309431	3.098e-06
Mzf1	0.308765	0.0480879
Glrx5	-0.308188	0.008172
AC125873.1	0.307929	0.0123789
LOC100360940	0.307899	7.747e-06
Scimp	0.307861	0.0006925
Unc93a	0.307575	0.0333359
Opn1mw	-0.30685	6.831e-05
Lcn2	-0.306768	2.188e-12
Plekha8	0.3067	5.663e-42
Slc43a3	-0.306381	0.0129282
Tifa	0.306289	8.182e-07
Mylk	-0.306227	0.041318
Vps13a	0.305695	0.00642
Egr3	-0.305048	0.0001909
Cacng5	-0.304917	0.0110163
Pde6h	0.304798	0.0003582
Klhl6	0.304634	0.0206784
C1qtnf2	-0.304353	0.002021
Tmem86b	0.304265	0.001131
Impg1	0.303586	0.0002789
Lfng	0.303242	0.0141758
RGD1565616	0.303229	0.0180286
Gabra1	0.302481	0.000214
Aacs	-0.302181	8.857e-08
Tnfrsf12a	0.301198	1.106e-14
Rgs14	0.300958	0.0237108
Hydin	0.300445	0.0183887
Stox1	-0.299529	0.0107325
Cyp11a1	-0.298683	0.015116
Zfp536	0.29861	0.0480868
Isg15	-0.298115	0.0159957
Dpf3	0.297329	1.151e-09
LOC102553880	-0.296998	0.0166706
Antxr2	0.296562	0.0423132
Depdc7	-0.296547	9.952e-14
Mgat4e	0.296056	2.821e-12
Apoa5	0.29595	0.002847
Agbl3	0.295303	0.002848
Cyb561a3	-0.295293	0.008913
Ctsz	0.295104	8.024e-09
Nfe2	0.294713	0.0002467
Actl7a	0.294616	3.147e-05
Rdh12	0.293489	2.274e-05
Emilin2	0.292961	0.0379669
Cdh19	0.29163	0.0106141
Gpsm2	0.291532	0.0003898
Chst3	-0.291017	0.0162074
Adamts2	-0.290865	0.0458912
Tnfsf9	0.29071	0.0319369
Lrp4	0.290106	7.64e-05
Tmem72	-0.289325	0.00266
Chac1	-0.288392	4.684e-06
Cabp2	-0.288236	0.0402614
Arhgap25	0.287947	0.0005647
Atp5g3	-0.287697	0.0005954
Arhgap45	0.287463	0.0171286
Fgf19	-0.286598	0.0197841
Nme1	-0.28634	0.005251
Rad54b	0.285431	0.039231
Plch2	0.285219	1.153e-10
Agtr2	0.285123	0.005644
Fam132a	-0.284619	0.0283267
Gpr155	0.283885	0.0383434
Adamts3	0.28284	0.000541
Lonrf3	0.282185	1.72e-09
Esco2	-0.281281	0.0134384
Itpka	-0.281114	6.831e-05
C1qtnf4	-0.280806	0.040007
RGD1306271	0.280331	0.0240024
Ahsa2	-0.280319	0.0156074
Espn	-0.280295	1.492e-06
Itga3	-0.279834	0.0149283
Sgip1	0.279392	0.007264
Hmox1	0.278852	2.247e-28
Fdps	-0.278786	7.64e-05
RT1-N3	-0.278744	0.0204228
Col27a1	0.278739	7.838e-09
Oprk1	-0.278687	0.001092
Gem	0.278614	0.000106
Dus2	0.278043	0.0215342
Srpk3	0.277902	1.104e-27
LOC100911403	0.277757	0.007338
Mvd	-0.277253	1.144e-05
Herpud1	-0.277218	0.006806
Cib2	-0.277067	4.854e-05
Reg3b	0.276882	2.645e-06
Nphp4	0.276782	9.577e-40
Ccdc81	-0.276067	0.007731
Idi1	-0.27578	4.891e-06
Zfp488	-0.275759	0.0005334
Hmgcs1	-0.275327	1.552e-06
AABR07052529.1	0.274898	0.001882
Pcp4l1	-0.273997	0.0171286
Slc2a5	0.27395	1.238e-06
Fads6	0.273922	1.289e-05
Mak	0.273631	2.194e-13
Ccdc78	0.273508	3.242e-07
Fndc5	-0.273473	0.001056
Btg2	0.272856	3.453e-05
Tfrc	-0.2727	5.827e-06
Htr2b	0.272639	0.0141477
Stab2	-0.272588	0.0003514
Stc1	0.272436	4.136e-16
Ptges3l	-0.271971	0.0394353
Sla	0.27193	3.453e-05
Ush1c	-0.271827	1.313e-05
Fscn2	0.270603	3.852e-12
Samd7	0.270387	6.709e-05
Nfe2l2	-0.27013	0.00125
Hsd17b7	-0.269496	0.0360145
Asxl3	0.268704	0.0267295
Cd74	0.268562	0.0409499
RGD1559588_1	-0.268315	0.028004
Itga4	0.267421	0.0198023
Fgf7	-0.266988	0.0002924
Ino80d	0.266958	0.0002191
Osmr	0.266812	9.106e-35
Slco4a1	0.266564	0.005521
Capn3	0.26609	1.075e-05
Selenov	-0.265622	0.0161919
Adam11	-0.265613	0.0001912
Nlrp6	-0.265554	0.0404175
Cadm2	0.265405	0.0228204
C2	0.26517	0.0166118
Lmx1b	0.264885	0.0234438
Myom2	0.264459	0.0105538
Acvr1c	-0.264402	0.008881
Gstt3	-0.26186	0.00118
Npm3	-0.261402	0.0498643
Slc26a8	0.261001	3.69e-12
Ankrd12	0.260876	5.647e-05
Camp	-0.260765	4.318e-05
Ppef2	0.260761	0.0003711
Fam135b	0.260711	3.679e-07
AABR07034239.1	0.260601	2.425e-09
Ceacam1	0.260133	0.0128191
Dact3	-0.260108	0.004173
Cpe	-0.259917	5.284e-09
Fabp4	-0.259446	0.0391048
Nabp1	0.259376	3.302e-05
Adgre4	0.258972	0.0118148
Slc27a6	-0.257972	0.039617
AABR07070043.1	-0.25699	0.00234
Acsm5	-0.256945	0.0381514
Lamc3	-0.256851	0.0008739
Rin3	0.256809	1.296e-06
Tmem163	-0.256052	0.0181578
Ppp1r10	0.255397	3.477e-09
Slc6a6	0.254702	2.292e-06
Idh3a	-0.254699	0.0317706
Dgkd	0.25448	0.0004007
Hsbp1l1	-0.253903	9.256e-21
Rnf151	-0.253664	0.003398
LOC102553190	0.253501	0.005777
Cttnbp2	0.253184	6.458e-05
AABR07058985.2	0.252953	0.0404995
Maff	0.252766	1.088e-07
Mafb	0.252677	0.002327
Slc6a7	-0.252581	0.0465527
Inpp5d	0.252573	5.644e-05
Phf11b	0.252536	0.0183887
Hpx	0.252434	0.003079
Col10a1	-0.251341	0.0002356
LOC100912611	0.250885	0.007659
Map3k6	-0.250468	6.845e-15
Slc12a6	0.2502	4.406e-05
RGD1304963	0.248695	2.686e-11
Gmfg	0.248457	0.006013
Zeb2	0.248424	0.0004642
Clcf1	0.248084	3.824e-23
Tm7sf2	-0.248053	0.009807
Cyp51	-0.247856	0.001277
LOC102546864	0.247432	0.0396944
Camsap1	0.246861	1.713e-09
RGD1560883_2	-0.245923	0.006931
Kmt2c	0.245798	0.005545
Lhx1	0.245624	0.0330623
Ifit3	-0.245577	0.011791
Hgf	0.245531	5.315e-07
Zc3h12c	0.245526	3.098e-06
Cox7b	-0.245474	0.01703
Avil	0.245146	0.002201
Map4k1	0.24489	0.0235828
Lat2	0.244882	0.0294295
Ngfr	0.244699	0.0003451
Pwwp2b	-0.24404	0.0005273
Cyp2d4	-0.243996	0.0009467
Kcnj14	0.243977	3.522e-05
Frmd4a	0.243367	1.727e-05
Usmg5	-0.243276	0.0320515
Twist1	-0.242912	0.0002136
Abtb2	0.242848	0.0231993
Bnip3	-0.242635	0.0172784
Ccr9	0.242343	4.234e-06
Cdpf1	-0.242291	0.0300183
Clec3b	-0.24205	0.046044
LOC100910259	-0.241643	0.041811
Dkk2	-0.240996	0.0437348
Shisa4	-0.240956	0.0277982
LOC108348118	0.240955	3.683e-19
Slc14a1	0.240565	1.977e-08
Paqr9	0.240151	1.472e-08
LOC100910581	-0.240008	0.0211593
Sh3pxd2b	-0.239625	0.0232591
Slc4a5	-0.239335	0.0260198
Fdft1	-0.239027	4.207e-05
Plcd4	0.238345	0.00184
AABR07058017.1	0.238149	0.0348845
Dnmt3b	0.237857	0.004722
Tshr	0.237632	1.522e-05
Camk1g	0.237592	3.25e-05
Nab2	0.237185	0.0148678
AABR07060862.1	0.236994	0.0174624
Rgl3	0.236902	0.0309325
Pcdhga8	0.236817	0.002785
Cep295	0.236303	0.033952
Fmnl2	0.235781	0.001882
Lamb3	0.235719	0.0006958
Prss36	0.23528	0.004577
RGD1309621	0.235265	0.009165
Fam188a	-0.23509	0.0283886
Tmem202	0.235028	0.0292879
AABR07052523.1	-0.23443	0.006453
Bend3	0.233953	0.0189702
Msantd2	0.23282	0.002199
Ptgir	0.232684	5.401e-06
Ccr7	0.232551	0.0250671
Il15ra	0.232361	1.765e-05
RGD1563222	0.231988	0.003795
Rftn2	0.231323	0.0429569
Csf1	0.231052	2.133e-18
Sele	-0.230671	4.193e-11
RGD1307315	0.230116	2.959e-05
Lyve1	0.229627	0.000324
Atg16l2	0.229351	0.001813
Gpr137c	0.229318	1.036e-32
Cox7a2	-0.229099	0.001523
Sts	0.229054	0.001055
Shc4	0.22895	2.044e-05
Nyx	0.228871	0.0460551
ENSRNOG00000058094	0.228332	0.001077
Trib2	0.228236	0.006389
Slf2	0.227696	0.001967
Ccdc142	0.227548	0.0392971
Sqle	-0.227492	5.053e-05
Zc3h12d	0.227261	0.0170922
Lrrc8b	0.227095	2.808e-05
Selp	-0.227063	1.563e-11
S100a6	-0.227053	0.0440186
LOC102550892	0.22672	0.0128191
Cngb1	0.226639	1.419e-08
Hmgcr	-0.226203	0.0005416
Idh2	-0.225865	0.006393
Rmnd5b	-0.225575	0.0095
Faap100	0.225541	1.055e-07
Lcor	0.225442	0.0282056
Rrad	-0.224789	5.571e-05
Acsf3	-0.224664	0.0401572
Rtp4	0.224344	0.001031
RT1-Da	0.224164	0.0306396
Olfml3	-0.223696	0.003944
Map1b	0.223657	0.0003075
Mmp13	0.223411	1.425e-05
Clec4f	-0.223248	0.001991
Hip1r	-0.222849	0.002366
Ccdc28b	-0.222729	1.186e-07
Ypel2	0.221956	7.903e-07
Ralgps1	0.221717	0.0002542
Dab2	0.221501	0.0100293
Pnlip	0.221494	4.047e-05
Uckl1	0.221481	4.397e-07
Sfxn2	0.221362	0.0390345
Nkd1	-0.221205	6.17e-07
RT1-CE10	-0.221151	0.0100042
Tulp1	0.220649	0.0001213
Lexm	-0.220487	0.008893
Klhl29	0.220178	8.717e-33
Sgtb	0.219832	0.007247
Gpr63	0.219122	1.83e-05
RT1-CE7	0.219077	0.001181
Rnd2	-0.219073	1.435e-05
Mfhas1	0.219034	1.908e-06
Loxl1	-0.218982	0.001742
Gfpt2	-0.218969	1.024e-08
Hmga2	0.218638	2.787e-10
Ildr2	0.218482	0.0439531
Hipk3	0.218414	0.0104067
Ier3	0.218286	7.357e-19
Gnat2	0.218111	0.0001486
Macrod1	-0.217455	0.0127046
Mtfp1	-0.21714	0.0122171
Kif24	-0.216599	0.001487
Usp13	0.216029	0.001523
Smc1b	-0.216021	0.002053
Neurod1	0.21596	6.863e-15
Cxcl1	0.215769	4.437e-08
Tars	-0.215621	4.146e-16
Fam160a1	-0.215158	0.0221015
Adra1d	-0.215063	0.0321581
Alox5ap	0.214863	6.265e-08
Fam169a	0.21427	1.05e-05
Mafg	0.214029	0.004863
NEWGENE_1306399	0.213907	0.004467
Ndufa1	-0.213867	0.0381965
AC115369.1	-0.213484	2.299e-05
Pdk4	0.213358	6.921e-10
Rmt1	-0.213258	0.033136
Abi3	0.213066	0.003513
Srsf6	0.212721	0.0149995
Fgr	0.212256	1.956e-09
Gdf9	0.212242	0.0198101
Mgp	0.212131	0.0201395
Pfkfb3	0.211957	0.0001329
Dennd3	-0.211949	0.0007599
Habp4	-0.211602	0.0195117
LOC100909712	0.210968	4.798e-08
Uqcr10	-0.209923	0.0404151
Ly6l	0.20966	0.005686
Cdc42ep4	-0.209645	0.003489
Ndufb3	-0.209297	0.002011
Ryr3	0.209285	0.0341452
Sema6c	0.20917	3.076e-09
Rcvrn	0.208803	6.796e-14
AABR07017159.2	0.208724	0.0003869
Ccdc113	-0.208721	9.513e-06
Cplx4	-0.208515	0.011791
Cd83	-0.208451	5.647e-05
Rdh11	0.20776	0.002026
Rassf4	-0.207479	4.751e-07
Mpc2	-0.207253	0.0224044
Fbxo2	-0.20725	0.007942
Lrit3	0.207154	0.0004244
Wdr47	0.206894	0.009418
Nfkbia	0.206733	0.005237
Slc6a12	0.20565	0.002915
Ndufb7	-0.205414	0.008095
Herc3	0.205314	0.000195
Grin2c	0.205306	0.0144772
Clec10a	0.204878	5.417e-09
RGD1563714	0.204362	0.001377
Trhr	0.204221	0.003766
Higd1a	-0.20418	0.00802
Chmp6	-0.20378	0.0373147
Tex28	-0.203452	0.00348
Zfp697	0.203422	0.0148125
Nts	-0.203276	0.01703
Kcnj13	0.20312	0.048829
Ogfod2	-0.203008	0.0370018
Agpat3	0.202784	9.597e-05
Zcchc2	0.202556	0.039819
Gcnt2	-0.202329	0.009656
Mier2	0.201916	2.11e-08
Eml1	0.20191	0.008509
Arhgap29	0.201544	0.0001789
Ndufs8	-0.201469	0.003926
Ddx58	-0.201184	1.527e-05
Stab1	0.201071	0.0110367
Lrg1	0.200547	3.674e-15
Dkk3	-0.200312	0.036104
Dtd2	-0.199618	0.0305836
Klf11	0.199102	1.437e-41
AABR07049960.1	0.199088	0.002287
Btbd3	0.199078	1.211e-10
Crb1	0.199039	0.0107332
Arr3	-0.19888	1.267e-05
Zfp280b	0.198752	0.0008658
Capn6	-0.198193	0.0181613
Minos1	-0.198154	0.03806
Egr2	0.198054	6.797e-13
E2f5	0.197612	0.000809
Ankrd1	-0.197589	0.0006494
Piwil1	-0.196309	8.552e-09
AABR07070456.1	0.196217	0.0361017
Plekha1	0.196055	0.0385728
AABR07032751.1	-0.195607	0.005409
Hcn2	-0.195486	0.0106201
Dut	-0.195283	1.488e-05
Ccr1	0.195263	1.422e-05
Gldc	0.19511	9.375e-10
Irak4	-0.195064	0.008168
Csdc2	-0.194953	0.009635
Kcnab3	-0.194782	0.0190787
Tex9	0.194628	0.001197
Il11ra1	-0.194614	0.0296674
Abcc5	0.194502	0.0374936
Dennd2a	0.194408	7.234e-05
Cox6c	-0.19436	0.003667
Lynx1	-0.193945	0.0320911
Rbp3	0.193752	1.716e-08
Rfc4	-0.193298	0.0147773
Tssk3	-0.193069	0.0106254
Mllt11	-0.192861	0.0122522
Uggt2	0.192721	0.045253
Etv6	0.192711	5.463e-07
C4bpa	0.192654	0.00155
Stx11	0.19227	9.089e-06
Ptp4a3	0.191633	0.0003995
Havcr2	0.191584	5.315e-06
Sbk2	0.191492	0.0005983
C1rl	0.191306	2.5e-05
Bbs12	0.191164	0.006245
Aoah	0.191159	0.0282056
Nlk	0.190841	0.008162
RGD1311805	-0.190827	2.296e-06
Tnr	0.190583	0.001454
LOC100364027	-0.190043	0.005659
Trpm2	0.189879	1.437e-15
Ccdc157	0.189416	0.008503
Msmo1	-0.189356	0.0008077
E2f1	-0.189167	0.0468871
Amotl2	0.188998	8.858e-11
Wnt8a	-0.188466	0.003847
Srd5a1	-0.188052	0.0110887
Ndufs3	-0.187997	0.0289917
Jun	-0.187909	1.333e-13
LOC100912599	-0.187799	0.0140883
Mrc1	0.187672	5.225e-06
Atp5i	-0.187657	0.0137562
Tram2	0.187438	0.0272435
Plat	0.187436	1.091e-06
Scg2	-0.18709	1.621e-05
Slit3	0.186145	3.9e-06
Slc25a31	0.18596	0.0396944
Ooep	-0.185823	0.0216583
Pou2f2	0.185751	0.002354
Slc24a1	0.185532	3.789e-09
Nrros	0.185089	0.006931
Ptpn7	0.184774	0.00213
Snta1	-0.18434	7.108e-06
Hmmr	0.184337	0.003931
Ahr	0.184193	5.513e-22
Sertad4	-0.184016	0.003881
Zfp473	0.183462	0.0385728
Acan	0.183155	0.0149283
Bmp15	0.182924	0.001362
Piezo1	-0.182866	0.001078
Cpm	0.182749	0.000173
S1pr3	0.182723	7.275e-13
Nkain1	-0.182639	0.008189
Pomc	0.182571	3.713e-09
Ndufb6	-0.182519	0.001189
Ppp2r2b	0.182443	0.000923
Cars	-0.182396	2.481e-05
Gadd45g	0.182195	2.291e-28
Bricd5	0.18218	0.0132078
Cox5b	-0.182075	0.0342984
Meltf	-0.181997	0.0490494
Tead1	0.181978	0.0120719
Adcy4	0.18192	1.279e-06
Polr1e	-0.181772	0.0201794
Herc6	0.180784	1.342e-12
Fabp12	-0.180781	1.41e-10
Clic4	0.180671	0.006052
Guca1b	0.18066	0.001131
LOC102547897	0.180652	0.006328
Scara3	0.180503	1.05e-05
Arl4d	0.180368	8.904e-19
Nsdhl	-0.180038	0.0003843
Bcl3	-0.1798	1.761e-09
Fzd9	-0.179651	0.00559
Abcb9	-0.179305	0.0006495
Nmur2	-0.179261	0.037136
Ahctf1	0.179086	0.0349481
RGD1306227	-0.178128	0.0003591
Cox4i1	-0.178042	0.0265646
Yars	-0.178035	1.231e-05
Rho	0.17785	3.274e-12
LOC100910163	0.177834	6.86e-07
Greb1	0.177821	0.0175901
Agtpbp1	0.177633	7.197e-19
Pla2g5	-0.177627	2.856e-08
Srek1	0.177539	0.015744
Sp5	0.177515	2.834e-21
Hpcal1	-0.177298	0.0003738
Amz1	0.177198	0.0264192
Lrrc2	0.176965	0.004609
Tsks	0.17657	2.856e-05
Cep250	0.17608	9.144e-10
Egr1	0.17602	3.615e-18
Cacng4	-0.175998	0.0414469
Wfikkn1	0.175906	0.0135127
Mab21l1	0.175799	8.988e-17
RGD1564171	0.175773	1.041e-06
Tp53	-0.174953	0.000286
Msn	0.174873	1.12e-10
Aldoa	-0.174808	6.46e-05
Sec22c	-0.174226	0.0004626
Crym	0.174084	0.00338
Rfx7	0.173796	0.0277115
Pih1d3	0.173672	0.0317373
Nosip	-0.173442	0.0490529
Megf10	0.172756	7.138e-08
Caskin2	-0.172699	0.0005031
Ptpn20	0.172319	0.0002531
Adgrb2	-0.172299	0.0006675
Il18bp	-0.172061	0.0252183
Zfp238	0.17206	0.001161
Rhbdf2	-0.171597	0.009416
Plxna4	0.171441	0.0425103
Ash1l	0.171161	0.0127958
Fas	-0.170843	0.0340945
Tdrd7	0.17065	0.00409
Ptpn6	0.170405	0.0007361
Col2a1	-0.170119	9.549e-09
Id4	-0.1701	0.037136
Reep6	0.169707	4.129e-31
Adra2c	0.169634	0.0001174
Csrnp1	0.169066	4.329e-13
Ilvbl	-0.168964	0.0401572
LOC100910669	0.168938	0.0008873
Hcn1	0.168824	0.001554
Pdhb	-0.168616	0.0290556
Rnf144a	-0.16773	0.0174396
Irf9	0.167458	2.615e-35
Optn	0.167149	1.434e-14
Arhgef33	0.167091	0.0002992
Krt18	-0.167055	0.008047
Bhlhe40	0.166963	5.187e-08
Pmp22	0.166827	0.0390345
Nudt14	-0.16674	0.007817
Ddit4	0.16619	0.001217
Tmem141	-0.165874	0.008702
Gnpnat1	-0.165527	0.0383434
AABR07001780.1	-0.165289	0.0152624
Wsb1	0.165013	0.0101814
Duox2	-0.164872	0.0215715
LOC100911483	-0.164599	0.00748
Klhl18	0.164547	0.005071
Podn	-0.164484	0.001655
Fam188b	0.163998	1.767e-17
Zfp36l1	-0.16394	0.0320669
Glis3	0.163836	0.0008601
Slc1a5	0.163768	1.244e-18
Pkm	0.16376	2.706e-05
Golga4	0.16344	5.024e-07
Dnase1l3	-0.163363	0.007833
Hectd2	0.163285	0.0134444
Stx2	0.163022	0.0124275
Anks4b	0.163013	2.507e-06
Hic2	0.162296	0.0308166
Cmtm7	0.162217	0.0278971
Cchcr1	-0.16213	0.0132149
Agbl5	0.161837	0.003997
Haus4	-0.161611	0.005781
Kif19	0.161291	0.005666
Igsf9	0.161157	0.0004148
Pcf11	0.161112	1.074e-06
Slc26a2	0.160905	2.189e-10
Grin2d	-0.160862	0.0007132
Ppp1r18	0.160773	4.118e-08
Dram1	0.160407	0.004612
Ggta1	-0.160383	0.0291352
Ago1	0.160369	0.003434
Apcs	-0.159888	0.0117321
Mrps25	-0.159661	0.0433853
Samm50	-0.15962	0.0320515
Nop2	-0.158993	0.005528
Gnb1	0.158574	2.03e-14
Sp7	0.158571	0.0210599
Ecscr	0.158497	8.539e-05
Fam53b	0.158497	2.571e-12
Slc25a30	0.158281	1.168e-85
Rgs16	0.158238	8.625e-05
Rab20	-0.158194	0.0001709
Cryz	-0.158126	0.0327399
Ankrd44	0.158063	7.121e-05
LOC500827	0.15786	0.0140204
Mpped2	0.157814	0.0128577
Pdgfra	0.157793	0.002287
Dusp5	0.157757	4.434e-10
Carmil3	0.15769	0.0261443
Tnfaip6	0.157635	1.065e-07
Whrn	0.157476	0.000456
Gar1	-0.156929	0.0442253
Nars	-0.156469	0.0001939
Atp5o	-0.156418	0.0442989
Sdr16c5	0.15605	0.0005861
Miga2	-0.156026	0.0247227
Ndufb9	-0.155915	0.006126
Atp5b	-0.155887	0.0480868
Ndufb2	-0.155722	0.0328047
S1pr2	-0.155515	0.0157268
Mdga1	0.155453	0.0168814
Klhl25	-0.155242	0.0146424
Lypd1	-0.155212	0.0404151
Bhlha15	0.154977	0.0005983
Sstr1	-0.154922	0.0247924
Itm2a	-0.154871	0.002887
Dlc1	0.154871	1.519e-08
Hsd17b13	0.154847	0.0309767
Atp5h	-0.154776	0.0416422
Plin2	0.154678	1.928e-06
Fbxw7	0.154548	0.001324
Scfd2	-0.154392	8.349e-05
Slc9a8	0.154334	1.795e-22
Vstm4	-0.154178	0.0183887
Glipr2	0.154097	6.312e-05
Qtrt1	-0.153935	0.026967
Aim2	0.153935	0.0433687
LOC108348175	0.153863	0.0004133
LOC102556148	-0.153763	0.039359
RGD1560289	0.15355	0.0232052
Eno1	-0.15355	0.0001476
Dio3	-0.1535	0.0002518
Pnldc1	0.15341	0.0143589
Dpysl5	0.15339	0.0228696
Matn1	0.153221	1.306e-05
Mllt10	0.153093	9.151e-05
LOC361646	0.153092	0.0267426
Gsto1	-0.152762	0.001256
Dclk1	0.152553	3.131e-19
Egflam	0.152505	0.0493574
Diras1	-0.15246	0.0188125
Rasal2	0.152391	9.697e-08
Selenom	-0.152252	0.0192262
Sertad1	0.152012	0.00133
Naa35	0.151623	3.125e-26
Pvt1	-0.151242	4.823e-08
Cfi	0.151216	0.001839
Npy2r	0.151041	5.155e-05
Slc38a8	0.150616	0.0233299
Thyn1	-0.150602	0.023696
Apopt1_1	-0.15041	0.0390555
Zfp14	-0.149377	0.0455609
Ms4a1	-0.149217	0.0160046
Rgs22	0.149211	1.457e-13
Nek6	0.149117	3.658e-07
Igfbp1	0.149087	0.0480879
Atp5j2	-0.148886	0.0120719
Rab32	0.148845	6.186e-10
Nupr1	0.148603	0.0121493
ENSRNOG00000047276	0.148561	9.511e-10
Cisd1	-0.148522	0.026967
LOC100360821	0.148282	0.008765
Gramd1b	0.147944	1.414e-05
Copz2	-0.147641	0.0469485
Sfswap	0.147603	0.0447488
Ckb	-0.14752	0.0003836
Spidr	-0.147381	0.0002359
Vdac2	-0.147379	0.0122113
Cox7c	-0.1472	0.001787
Malt1	0.147054	0.0134384
LOC102551435	-0.147048	4.033e-06
Sdc4	-0.146742	0.0320515
Spon2_1	-0.146467	0.00249
Map3k8	0.146302	2.375e-06
Acap2	0.146249	0.0208531
Dpysl3	0.146241	0.0004275
Zdhhc2	0.145968	0.002026
Abcc1	0.145838	0.001325
Pkig	0.145532	0.0007281
Hes5	-0.144979	2.531e-14
Celsr2	-0.144944	0.0469391
Gpx7	-0.144932	0.0437348
Adamtsl1	0.144844	0.0104354
Madd	0.144797	0.0149034
AABR07012054.1	0.144752	0.0181613
Atp5j	-0.14465	0.0277115
Il4r	-0.144627	6.21e-13
Ndufc2	-0.144468	0.0480945
Rdh8	0.144451	0.0004342
Ap1b1	-0.144426	0.0388793
Slc38a2	-0.144378	1.065e-06
Brsk2	0.14389	0.0001709
Uqcrh	-0.143657	0.009209
Glmn	0.143627	3.407e-06
Pros1	-0.143551	0.001823
Ccdc50	0.143457	0.0291515
Ccnd2	0.143372	0.006707
Pced1a	0.143344	0.0311758
Slc29a1	0.14315	2.079e-24
Eif2ak2	-0.142607	8.863e-06
Tob1	0.142539	0.002055
Mamdc2	-0.142381	0.005063
Miox	0.142174	1.282e-11
Dmp1	0.1419	0.002775
Sapcd1	0.141831	0.0484251
Engase	-0.141695	0.0213231
LOC103691744_1	-0.141678	0.0119477
Oat	-0.141542	0.0160046
Stat3	0.141237	2.086e-29
Urb1	0.141037	0.0270102
LOC100911548	0.140954	2.778e-07
Pcmtd2	0.140897	1.542e-12
Ndufa6	-0.140709	0.023757
Ddx10	0.140624	0.0374554
Cbl	0.140605	0.0174971
Ifi44	0.140531	4.043e-13
Slc4a1	-0.140382	0.0273447
Siva1	-0.14037	0.002342
LOC100361105	-0.140128	0.001406
Gnl3	-0.140113	0.00351
Lamtor5	-0.139977	0.005477
Cds1	0.139862	2.13e-11
Cebpb	-0.139627	0.0004686
Chl1	0.139272	1.474e-06
Alkbh5	0.138892	0.006393
Ttc39c	0.138763	5.53e-17
Gnaz	-0.138401	0.006415
Atp5l	-0.138363	0.0278971
LOC679739	-0.138159	0.0244889
Gpr151	0.137741	0.0002046
Calml4	0.137597	0.006249
Hdc	0.137351	0.0106453
Sh2b3	0.137279	0.004387
Speg	0.137195	1.236e-28
Mmd2	-0.137134	1.449e-07
Spred3	-0.137096	6.143e-06
Nov	-0.137011	0.003297
Cfap54	0.136975	0.0003727
Cd244	0.136944	2.456e-05
Tpcn1	-0.136863	0.0273851
Pmm1	-0.136858	0.0008967
Pax4	0.136782	0.001764
Kcng4	0.13662	1.09e-41
Cptp	-0.13653	0.002505
Slc18a1	0.136449	1.163e-05
Glb1l2	0.136247	9.1e-27
Pcgf6	0.135959	0.0004686
F8	0.135834	0.0148647
Rtn2	-0.135671	0.001348
Fopnl	-0.13562	0.0117093
B3galt5	-0.13542	0.0427444
Ndufa4	-0.135113	1.704e-05
Aars	-0.135068	1.461e-05
Gpsm1	0.135049	0.003566
Stat5b	-0.134629	1.709e-05
Ndufs5	-0.134515	0.0220341
Adrb1	-0.134468	0.001111
Nfkb1	-0.134434	0.0001246
Slc25a10	-0.134334	1.327e-07
Pus7	-0.13423	0.005669
Pcdhga10	0.1342	0.0122148
Rrp1b	-0.134126	6.544e-13
Leng1	-0.13381	0.001335
AABR07054554.1	0.133368	5.471e-05
Smim20	-0.133112	0.013533
Ddx39b	0.133036	0.0447567
Cnot6	0.132915	0.0190787
Pak3	0.132886	0.0106201
Ly6al	-0.132574	0.0277817
Rbbp6	0.132573	0.004697
RGD1561277	0.132081	0.0175188
LOC100364062	0.131793	0.000339
Scrn2	-0.131742	0.003827
LOC108349594	-0.131712	8.207e-05
Ptgis	-0.131545	0.0003256
Agtrap	-0.131484	9.419e-05
Acaca	0.13147	2.842e-05
Crebrf	0.131124	7.014e-11
Wdr46	-0.131073	0.003641
Faim_2	0.131072	9.423e-08
Ddah2	-0.130849	3.809e-05
Uqcrb_1	-0.130789	0.0002322
Nme3	-0.130668	9.585e-05
Cdan1	0.130646	0.00305
Snx20	0.130542	0.0167731
AABR07052897.3	0.130452	0.0144463
Casc4	0.130254	5.485e-06
Gmpr	-0.130218	0.0383798
Slc17a7	0.130186	1.81e-07
Iars	-0.129912	7.227e-07
Sema3f	0.129775	3.402e-32
Mlf1	-0.129684	0.001487
Rpap1	-0.129633	0.003574
Coa3	-0.129577	0.0293878
Nos3	0.129548	2.369e-05
Klf7_1	0.129484	0.004929
Invs	0.129459	0.0439598
Bhlhe41	0.129312	0.00227
Zfp707l1	-0.129289	0.0245152
Cish	0.129267	5.123e-31
Pdp2	-0.129114	4.543e-05
Eif2s2	-0.128946	0.0006178
Dst	0.128937	0.0244807
Cit	-0.128192	0.000589
Slc31a2	0.128138	0.0187495
Dhcr7	-0.1281	0.0412671
Jaml	0.128085	0.006278
Mfap2	-0.127741	0.0003681
Rapgef5	-0.12768	6.192e-05
Mrps36	-0.127465	0.0205741
Atg4d	-0.127389	0.0362834
Rrp12	-0.127032	3.004e-07
Capn7	0.126781	0.001565
Ccdc13	-0.126419	0.0350718
Ly6g6d	-0.12611	0.0378489
Uqcrb_2	-0.126026	0.0003898
Parp12	-0.125787	0.003522
Bst2	0.125665	0.0008777
Btc	0.125653	1.46e-05
Prdm15	0.125423	0.005895
Slc46a3	0.1254	0.0294893
Got1	-0.125357	7.899e-05
PVR	-0.125338	6.455e-06
Rc3h1	0.125027	0.0256699
Gimap9	0.124969	0.0278802
Mdn1	0.124893	8.323e-07
Smchd1	0.124869	0.0150409
Ddx21	-0.124574	0.0003866
Pfkfb2	0.124561	8.297e-11
Rai14	0.12398	0.0002904
Slc25a33	-0.123848	0.00037
Zfp358	-0.123791	0.0446192
Eci1	-0.123544	0.0297765
Bcar1	-0.123293	0.0288506
LOC100912181	0.123252	0.0120719
LOC500227	-0.12302	0.004229
Nav1	0.122918	0.0002449
Vsir	0.122901	0.007405
Zcchc12	0.122856	0.0158028
Hook2	0.12282	0.0181613
Rangrf	-0.122709	9.151e-05
Nox4	0.122561	0.0224448
Nkiras1	-0.122265	0.0330623
Polg2	0.122258	2.923e-09
LOC689230	0.122237	0.0419813
G0s2	-0.122199	0.0298476
Vax2	-0.12216	0.0001433
Blmh	-0.121977	0.0100796
Acbd6	-0.121449	0.0452527
Kremen1	-0.12143	5.37e-27
Tmem218	-0.12131	0.0005545
Pitpnm1	0.121292	7.121e-05
Egfl8	-0.121043	0.001823
Rabgef1	0.12103	0.00338
Il1r1	0.121005	3.143e-17
AABR07035796.1	-0.120888	0.007724
Tdrp	-0.120796	0.0431413
Tmem150c	0.120711	0.0415755
Ndufa5	-0.120677	0.0332561
Cblb	0.120543	0.001732
Egf	-0.120319	0.004477
Ccdc96	0.120195	0.033136
RGD1305184	-0.120079	0.00155
Zbtb20	0.120049	0.004237
Npm1	-0.119975	0.004773
Mgarp	-0.119958	0.03807
Vps37a	0.119663	0.0003047
Steap4	0.119246	2.026e-21
Plk5	0.119106	0.0218154
Cxcl12	-0.118821	0.0373744
Mt1	0.118817	4.693e-08
Otx2	0.11839	0.005101
Vldlr	0.118353	0.0001098
Ndufb11	-0.118182	0.0003226
Bbs9	0.118165	0.0004083
Ccdc155	0.117913	5.225e-05
Atp2b4	-0.117364	0.0476082
Rrh	-0.117115	0.0493549
Grik1	0.11701	0.011567
Sec16b	0.116809	3.458e-27
Wnk2	0.11667	0.001823
Alox5	0.116621	0.003599
Frmd4b	0.116489	0.005916
Adat1	0.116454	0.0165113
Cby1	-0.116446	0.004675
Utp14a	-0.116432	0.0428245
Zwint	-0.116297	1.816e-06
Mthfd1l	0.115969	0.0286347
Polr3k	-0.115893	0.0471194
Josd1	-0.115809	0.001732
Gnat1	0.115664	5.481e-26
Ccr3	0.115194	3.162e-05
Irf2bpl	0.115016	1.044e-26
Btbd17	0.115002	0.001244
Ifrd1	-0.114946	3.103e-05
Snrk	0.114934	0.0239647
Tmem100	0.114823	0.0136195
Vezt	0.114686	0.002866
Asns	-0.114371	8.747e-45
Mapre3	0.114076	0.0002468
Ide	0.114072	1.556e-05
Abca4	0.113992	2.725e-06
Nat14	-0.113965	0.0009181
Eif2ak3	0.113958	9.665e-08
Slc22a15	0.113852	5.04e-18
Pcdh15	-0.113786	0.003135
Rhot1	0.113755	0.0112918
Ebf2	0.113697	0.006245
Arid5a	0.113691	2.03e-14
Pgk1	-0.113686	0.0225923
Slc7a10	-0.113671	0.004914
Palm3	-0.113668	0.0183937
Qsox1	-0.113396	1.276e-12
Gramd2	0.113316	2.292e-20
Ghitm	-0.113146	0.003408
Camta1	0.113106	4.298e-05
Glul	-0.113089	4.196e-05
Sntg2	0.113033	8.431e-14
Casp4	0.112586	0.002193
LOC100360218	-0.112567	0.003436
AABR07051555.1	-0.112529	8.259e-05
Rhebl1	0.112468	1.15e-10
Hnf4g	-0.112396	0.0187691
Fblim1	0.112352	0.0002673
Dctn3	-0.111616	0.0112258
Eps8	0.111343	0.003074
Cox6a1	-0.111196	0.0342984
Pgam1	-0.111092	0.001732
Hs3st3b1	0.111083	0.0147549
Plk3	0.11103	0.0004318
Bcl6	-0.110905	2.18e-05
Nop58	-0.110885	0.0282056
Vsx1	0.110883	0.014904
Tln2	0.110433	4.983e-05
Pogk	0.110339	0.0362834
Gpr88	-0.110333	0.005465
Nudt6	0.11032	0.0002052
Sytl2_1	0.110243	0.0446857
Dcaf13	-0.110162	0.0404151
Nkiras2	-0.109972	0.0104354
Chtop	0.109926	0.0150409
Abcg4	-0.109838	0.0004503
Atf7	0.109343	1.131e-07
LOC100911492	0.109328	0.003838
Fgf11	-0.109273	0.0003047
Ift27	-0.109163	0.00532
Fbln5	-0.10916	0.0481637
Gcnt4	0.108866	0.0102943
C1r	0.108837	8.919e-05
Rab3ip	-0.10867	0.0216583
Hagh	-0.1085	0.0374554
Hs2st1	0.108488	0.0240252
Vbp1	-0.108427	0.005411
Ctnnbip1	-0.108423	0.0001497
Mkks	-0.108413	0.0449255
Thg1l	-0.107993	4.511e-06
B3galnt1	-0.107955	0.0478853
Unc45a	-0.107943	0.0179799
Chd2	0.107685	0.0373376
Bop1	-0.10768	0.0271019
Notch4	-0.107565	0.0185715
Cdr2	0.1075	8.177e-12
Pdc	0.107054	2.765e-07
Acadm	-0.106956	0.0001036
Ndufa2	-0.1067	0.0139376
Frmd8	-0.106389	0.0004042
Rgs19	0.106348	0.009276
C5ar2	0.106345	0.0003681
Il1rl1	-0.106335	0.0176577
Mcf2l	0.106238	0.005528
Ppp1cc	-0.106174	0.030097
Smarcd1	0.106089	3.431e-28
Naxe	-0.106038	0.005142
Lrrc75b	-0.105827	0.0243883
Znf768	-0.105793	0.0388424
Serpinf2	0.105612	0.0414484
Wdr5b	0.105411	0.0002965
Hsph1	-0.104839	5.883e-05
Wnt8b	0.10479	0.0391635
Ccl11	-0.104756	0.007112
Procr	-0.10475	1.556e-05
LOC108348052	-0.104613	5.285e-07
Pigl	-0.104497	0.0221804
Isca1	-0.104441	0.0234479
Slc35g3	0.104278	0.0239604
Diras3	-0.104238	0.0194399
Rab30	0.104213	3e-05
Tbc1d25	-0.10406	0.0195663
Strbp	0.103933	0.0395199
Rnd1	-0.103796	4.462e-06
Slc12a4	0.103354	0.001029
Pfkl	-0.103193	2.407e-05
Crx	0.103024	0.003605
Nim1k	0.10293	1.566e-13
Tnfrsf9	0.102867	1.176e-11
Mettl1	-0.102864	2.908e-05
Pla1a	0.102693	0.003353
Rpp38	0.102277	0.003342
Ints13	-0.102275	0.0249531
LOC502684	-0.102075	0.0191758
Pdpn	0.101861	2.341e-20
Gale	-0.101755	2.177e-05
Tigar	-0.101707	0.0102385
Ptpn14	-0.101321	0.0329774
Prima1	-0.101105	0.0191993
Lrrc49	0.100939	0.0338287
LOC100911776	0.100644	0.0147773
Lif	0.100631	8.442e-36
B4galt5	0.10047	2.458e-10
Acox3	0.10041	0.0437348
Pim3	0.100375	0.005193
Fam198a	-0.100332	0.0408557
Arl16	-0.100292	8.375e-05
Man2a2	0.099995	0.0001049
Pigs	-0.0998521	0.00681
Aplf	-0.0997775	1.01e-08
Rhobtb2	0.0997571	0.0116545
RT1-CE1	-0.0997353	0.001408
Magee2	0.099726	0.00849
AABR07002674.1	-0.0994891	0.004609
Taf1d	0.0992572	0.033103
Lamc1	-0.0992451	0.006804
Grsf1	-0.0992089	0.001728
Kdelc1	0.0991991	0.0456584
Qprt	-0.0991926	0.00282
Slc18a2	-0.0990852	0.0235828
Fis1	-0.0989959	0.0221804
Pde8b	-0.0989755	0.0001817
Odc1	0.0987561	1.213e-10
Parp14	-0.0987532	0.0246371
Insig1	-0.098748	0.005127
Stard10	-0.098657	2.933e-06
Cabp5	0.0985592	0.001711
Mok	-0.0984255	0.00947
Mertk	0.0983647	0.0001441
Ecel1	-0.0980763	1.669e-07
Nhs	0.0978803	0.0226082
Pcbp4	0.0977837	0.0151789
Ppard	-0.0977518	3.11e-06
Cpne8	-0.0977034	0.0009082
Elovl4	0.097544	0.011835
Ubap1l	0.09748	0.0004432
Carhsp1	0.0974209	4.871e-10
Trmt2a	0.0972058	0.0230176
Ctbs	0.0971616	0.00219
Ttyh1	0.0971128	0.003393
Txndc16	0.097005	0.0001369
Prr7	0.0968391	0.0009828
Cirbp	0.0968051	0.0165426
Dhrs11	0.0967359	1.074e-06
Agt	0.0966906	2.573e-05
Slfn13	0.0965708	2.088e-06
Sars	-0.096505	0.0194373
Spryd3	-0.0962874	0.0208525
H2afv	-0.0962334	0.0251249
Hist3h2ba	-0.0958499	0.0001423
Myadml2	-0.0956884	0.0340857
Otud7b	0.0953722	3.978e-06
Pdcl2	0.0952784	0.0496404
Ampd3	0.094943	0.0297765
Fhod3	0.0949138	0.009672
Gbas	-0.0946016	0.0298476
Eng	0.0944286	0.002543
Socs1	0.0942532	0.000171
Ipo5	0.0942025	4.527e-09
Gsto2	0.09412	0.011565
Fktn	0.0940923	0.0220568
Ankrd34a	0.0940631	0.0416066
Hes6	-0.0940174	0.0005971
Fam69c	-0.0939772	6.748e-10
Dtnb	0.0937455	0.0276909
Ubac2	-0.0937268	0.0121562
Pprc1	-0.0935926	6.731e-06
LOC102551095	0.0935586	0.003245
Mms19	-0.0935534	0.00542
Ric8b	0.0933336	1.768e-05
Nfat5	0.0932301	0.0192901
Dok2	0.0931125	0.0003595
Aipl1	0.0929562	9.472e-07
Pgp	-0.0929297	0.0244032
Galnt14	-0.0928653	0.0299151
Pml	0.0927866	1.665e-07
Pik3c2a	0.0926421	0.001671
Fosl2	-0.092639	0.0118221
Fam49b	0.0925049	0.0348156
Slc16a1	-0.0924589	3.601e-11
Prrg1	0.092438	0.0139987
Pacsin2	0.0924367	0.0001496
Tmed5	-0.0924213	0.0111259
LOC685933	0.0922637	0.0321307
Abca8a	0.0918258	0.0261547
Ctxn3	-0.0917717	0.0434872
Pycr1	-0.0917614	0.007925
Gngt1	0.0917039	0.0104297
Kcne5	0.0915971	0.048829
Flot1	0.091326	1.987e-05
Mcm4	-0.0913123	0.0115923
Ggn	0.0906515	0.001195
Fen1	-0.0906504	0.0335337
Hacl1	0.0905271	0.003135
Ralgds	-0.0904332	0.003353
Vopp1	0.0904239	0.0002235
Chrnb4	0.09031	5.315e-06
Elmsan1	0.0901371	0.0002646
Zswim6	0.0900383	0.009408
Asb8	-0.0899225	0.0200719
AABR07028488.1	-0.0898949	0.0340148
Aldoc	-0.0897898	0.0306396
Raly	0.0896561	0.003668
Siah2	-0.0896378	0.0007057
Slc1a7	-0.0895716	0.0006203
Wif1	0.0893806	0.0005652
Zfp869	0.0892592	0.0315363
Midn	0.0891744	0.0390345
Tbc1d15	-0.089142	1.425e-05
Pla2g2a	0.0889356	0.0001117
Ino80	0.0888883	0.00693
Hspa1l	-0.0887007	0.0273662
Heatr1	-0.0886656	0.00992
Mars	-0.0885025	3.32e-14
Ifitm10	-0.0883919	0.008006
Rit1	-0.0879817	0.0415915
Ptpn1	-0.0878692	2.911e-11
Clu	0.0877975	1.075e-05
Orai1	-0.0877704	0.001627
Zc4h2	-0.0875707	0.0460314
Scaf4	0.0875007	0.0237048
Rbm14	-0.0874941	0.0436302
Zfp36l2	0.0871614	1.281e-08
Ier5l	-0.0869525	0.004736
Uck1	-0.0866683	0.0291451
Mfge8	-0.0866555	0.0389623
Arhgef39	0.0866398	0.0007111
Taok3	0.0865797	1.011e-07
Tnfrsf1a	-0.0865564	1.297e-07
Runx3	-0.0863743	0.004034
Ccs	-0.0862305	0.0002136
Ppp1r15a	0.086211	0.000714
Gulp1	-0.0861997	0.0002257
Car6	-0.0860648	0.007817
LOC102555635	0.0858192	0.0227404
LOC108348048	-0.0855522	0.0358163
Prkx	-0.0854311	0.003827
Cmpk2	0.0852654	2.18e-05
Wdr43	-0.0848416	0.0341135
Mrps27	-0.0848031	9.24e-05
LOC690871	-0.0846932	0.0450464
Syne3	-0.0844811	0.00191
Svop	-0.0842997	3.754e-06
Rn60_17_0763.1	0.0842943	0.0353774
RGD1562114	-0.083941	0.0487062
Mef2d	0.0837934	0.0174971
Fam49a	0.0837559	0.0212283
Clk1	0.083687	0.0141778
Slc38a3	0.0835738	1.696e-06
Lap3	0.0832887	9.911e-06
Tma7	0.0832592	3.851e-05
Gnrh1_1	-0.0831488	0.037398
Ccl20	0.0831171	8.016e-14
Icmt	0.0828595	5.662e-05
Kcnn1	-0.0824759	0.001006
Gars	-0.0824631	0.0001669
Mpi	0.0824478	0.0001865
Cdk5r2	0.0824406	0.0178192
Fam184b	-0.0820932	0.007927
Pus7l	-0.0820673	0.022199
Srxn1	0.0819743	0.0003354
Ntng2	0.0819035	7.102e-05
Cdk12	0.0817215	0.0144225
Acss2	-0.0815526	9.02e-06
Dtx3l	-0.0814281	2.074e-07
Zmynd8	-0.0813675	0.005066
Qser1	0.081272	0.004456
Acss3	0.0811907	0.002365
Fam229a	-0.0811304	0.006013
LOC680200	-0.0810682	0.00813
Unc5b	-0.0810596	0.0358936
Thnsl2	-0.0806816	0.043749
mrpl24	-0.0805077	0.026012
Itga7	-0.080481	0.006304
Chchd5	-0.080284	0.026343
Dock8	0.080029	0.002436
Ncan	0.0799667	4.151e-09
NEWGENE_619861	-0.0799237	0.0115419
Edrf1	-0.0799091	0.003998
Lztfl1	-0.0799054	0.0162717
Hmgxb3	0.0798926	9.98e-08
Crem	-0.0798793	5.023e-07
Nacad	-0.079713	0.0144352
Igbp1	-0.0795021	0.023696
Sgpl1	0.0793201	3.66e-06
Aven	0.0792618	0.000516
LOC100912489	-0.0790328	0.009022
Gadd45a	-0.0788829	0.001256
Steap1	-0.0787515	0.0273145
AABR07025023.1	0.0786527	1.105e-10
March1	0.0786158	5.246e-07
Tmem8a	-0.0785953	5.589e-06
ENSRNOG00000043417	0.0784479	0.0146022
Ift57	0.0782956	3.528e-17
Rock2	0.078028	0.008473
Ubash3b	0.0778093	0.001825
Hs6st1	-0.0774755	0.001152
Car2	-0.0773611	0.0141276
Sbno2	0.077292	2.803e-13
Samd10	0.0772659	0.02076
Uhrf1bp1l	0.0770966	0.009423
Jak2	0.0769872	2.296e-06
Dad1	-0.0768977	0.004189
Atp1b2	0.0768959	0.0200691
Sumo3	-0.0768693	0.0151757
Kank1	0.0768585	0.0144139
Hddc3	-0.076663	0.0297765
Znf48	-0.0765811	0.031853
Arid5b	0.0762788	0.0306396
Pcsk4	0.0759377	4.158e-10
Ikbip	-0.0757699	0.038171
Ndufa12	-0.0757673	0.0105417
Atg4c	0.0757648	0.0420951
Plpp2	0.0756883	2.162e-14
Rhot2	0.0756587	0.0292772
Bmf	-0.0753686	0.0112964
Farsb	-0.0753497	0.0269202
Cgrrf1	-0.0752824	0.0167639
Crcp	-0.0750457	0.0001561
Ccdc107	0.0749709	0.0004254
Nr2e3	-0.0746961	5.299e-13
RT1-CE9-ps1	0.0745341	9.089e-06
Ppp2r5e	0.0745223	0.022199
Flrt3	0.0744672	0.0008409
Map2k4	-0.0743096	0.008842
Map4k3	0.0742931	0.006645
Sod2	-0.0741153	1.276e-11
Fam3c	-0.0739868	0.0476082
Gnb3	-0.0739299	1.33e-05
Prkcz	-0.0738802	0.022543
Nfyb	0.0738546	7.913e-07
Psat1	-0.0737401	0.004728
Vps50	-0.0737385	0.001492
Lmo1	-0.0735561	0.001286
Gsta4	-0.0734891	0.0369622
Ccdc126	0.0733141	0.0003099
Tsc22d3	0.0732767	0.0487657
Il17ra	-0.0732691	0.0001169
Mitd1	-0.0731281	0.0436302
MAST1	0.0730296	0.0004479
Trim21	-0.0729474	0.001487
Heatr5a	-0.0728606	0.0278772
Zyx	-0.0727949	0.001161
Slc16a8	-0.0726308	0.0192453
Scmh1	0.0726153	0.009532
Abhd8	-0.0726018	0.007245
Mxd4	-0.0725831	0.004692
Akr1c19	0.072489	0.005763
Slc16a6	0.072483	0.001522
Tmem18	-0.072401	0.0125947
Phyhd1	0.0723149	0.000214
Crabp1	-0.0722812	0.002026
Slco2b1	0.0722448	0.0337788
Flot2	-0.0719202	3.795e-08
Ckmt1	-0.0719025	0.001167
Plekha4	0.0714809	0.002785
Hnf4a	0.0713796	0.001078
Tmem120a	-0.0709574	0.0005397
Hmgn1	-0.0709268	0.0013
[truncated: 675 more rows]
