# Supplementary material for: Comprehensive transcriptomic analysis reveals canonical and novel pathways modulated by nanoceria in mammalian retinal degeneration
Source: Research Square preprint supplement (doi:10.21203/rs.3.rs-7456023/v1), 2025-10-25
Supplement: Supplementary file 4 [file 9066990928836a79b0b53da7.xlsx]

## Sheet: Table_S1_LD_vs_CTRL_DEGs
Gene	log2FC	FDR
Hprt1	8.94827	0.004208
Rn60_20_0047.3	-8.28528	6.64e-05
LOC102556337	-8.02719	0.0002808
Hsp90aa1	7.97164	0.0162368
LOC108348074	7.81619	0.0069
Yme1l1	-7.44538	0.004047
Fam71a	7.41929	7.327e-08
Olr1641	7.28695	0.005933
Haus1	7.16734	0.0202757
Il6	7.06511	2.493e-18
Plscr5	6.73767	0.009288
Ccl2	6.67617	7.633e-113
RGD1560883_2	-6.64175	0.004777
ENSRNOG00000037495	6.63185	0.0007097
RGD1565462	6.43845	0.0397005
LOC100910708	6.27082	0.001849
LOC108348155	6.03492	0.0254093
Rn50_X_0744.5	5.99616	0.004886
AABR07024869.1	5.96826	0.0274741
Ccl3	5.92952	9.609e-81
Kng1	5.90149	3.673e-09
Ccl7	5.83596	1.933e-64
AABR07017770.2	5.79138	0.0404056
Fcnb	5.5699	4.95e-28
Rn50_15_0408.6	5.5432	1.349e-12
LOC297568	5.38732	0.0007491
AABR07024870.1	5.32051	0.003118
Pate4	5.31736	1.853e-08
M6pr	-5.27744	0.043627
Cxcl10	5.26587	1.421e-45
AABR07070581.1	5.23556	3.541e-13
Reg3b	5.21065	3.838e-10
Clec4e	5.16498	1.622e-08
Gdf1	-5.14937	0.0003644
Ptx3	5.13273	4.967e-24
LOC500712	5.06814	8.481e-18
AABR07015917.1	4.88613	3.358e-13
Fosl1	4.85539	2.774e-91
Il20	4.84778	0.0002516
Matn1	-4.80743	0.000752
Hmga2	4.80315	8.038e-15
Usp9y	-4.8028	0.011053
Wfdc18	4.80067	3.611e-08
AABR07044551.1	4.77437	6.777e-11
Hhla1	4.76871	0.004037
Reg3a	4.72114	0.002407
Mmp7	4.68525	4.884e-08
Lif	4.67155	2.05e-47
Clec4d	4.6063	3.433e-20
Rnase2	4.59144	2.029e-07
Cxcl11	4.55843	1.593e-35
Socs3	4.49423	9.788e-104
AABR07043701.1	-4.48842	0.0002508
Ccl12	4.41895	8.3e-20
AABR07060792.1	4.34728	0.0458711
Mrgprg	4.34726	2.713e-09
Acod1	4.28895	1.295e-05
Foxn4	4.25858	1.666e-13
Ccl4	4.20961	5.024e-33
LOC103691893	4.20799	0.0007231
ENSRNOG00000049024	4.17133	0.0360291
Rn60_20_0069.2	4.14359	4.578e-11
Krtap15-1	-4.12366	0.0246084
Rptn	-4.09047	0.001005
Krtap16-5	-4.08531	0.002295
Krtap14	-4.0483	0.024576
AABR07065815.1	-4.04064	0.0177265
Hamp	4.03925	0.0165443
Fgf23	3.99908	1.946e-07
Krtap2-4	-3.97404	0.0330249
Slc13a5	3.97014	2.998e-46
Gpr33	3.95821	0.0182048
Krtap1-5	-3.95583	0.0151307
Mt1m	3.94903	0.0001385
Ndufa10l1	-3.94348	2.963e-06
Calca	3.94166	4.511e-10
LOC102546596_2	3.9282	0.001835
Arl9	3.9191	0.0184269
AABR07013116.1	-3.8758	0.0449505
Hmox1	3.86858	1.004e-41
Il17f	3.85289	0.0436469
RGD1565355	3.8451	3.799e-10
AABR07033274.1	-3.83877	0.0134464
Erp27	3.8139	0.0004962
Prok2	3.78308	0.0472941
AC129395.2	3.77582	0.0334818
Aqp6	-3.76553	5.252e-09
LOC680160_1	-3.7619	0.0489632
Edn2	3.74608	5.155e-21
LOC681458	3.70356	0.0178967
Cd209e	3.70086	2.514e-06
RGD1564347	3.69138	0.00901
Mt2A	3.68213	1.987e-54
LOC500035	3.66792	8.672e-06
Mcemp1	3.64942	3.042e-07
AC125873.1	3.60687	0.001351
Il19	3.60367	0.0158831
Lcn2	3.60035	1.811e-13
Arl5c	3.59719	1.308e-21
Lilrc2	3.54834	3.225e-08
Glp1r	-3.54499	1.27e-06
Patl2	3.54137	0.009428
Scgb3a1	3.51801	0.0008286
LOC24906	3.51153	2.58e-13
Il23r	3.46298	2.481e-23
Sp5	3.45607	2.262e-25
Spata3	-3.45204	0.0429906
Igsf7	3.4421	0.006849
Camp	3.44163	1.356e-05
Il27	3.44121	0.007826
Sele	3.41931	4.95e-28
Clec4b2	3.41255	0.0001497
AABR07036542.1	3.41128	7.987e-07
Siglech	3.40662	2.169e-07
AABR07065124.1	3.38582	6.048e-18
Clcf1	3.38517	1.658e-28
AC109891.1	3.38227	2.299e-07
Rbp7	3.34596	0.0424288
Piwil1	-3.29926	7.515e-08
Cd209d	3.28715	0.0001615
Ttc24	-3.26337	4.648e-19
AABR07043354.1	-3.24389	0.0371208
Lrrc15	3.21246	4.858e-40
LOC100910138	3.18415	0.009356
Apof	3.17022	0.005933
Kcne1	3.16956	0.0222017
LOC681325	3.1435	3.747e-12
Skor1	3.12302	0.0008672
AABR07017635.2	-3.11138	3.784e-06
Impad1_1	-3.1015	0.0139296
Krtap7-1	-3.08771	0.0393388
H1foo	3.08215	4.918e-06
Csf2rb	3.07967	3.638e-29
AABR07034239.1	3.06523	2.912e-10
Gnat1	-3.06097	1.534e-20
Il11	3.05285	2.147e-11
Egr2	3.03495	1.195e-13
Ervfrd-1	3.00551	5.495e-08
Cd209a	2.99668	0.00174
Ptprh	2.99181	6.655e-10
Stfa2	2.95988	2.398e-07
Osmr	2.92711	3.929e-42
AABR07040792.1	-2.92382	0.0283554
Chi3l1	2.91314	2.643e-34
Cish	2.9086	1.614e-40
Mogat1	2.89386	0.017872
Selp	2.89144	5.893e-18
Fcgr2b	2.89138	1.668e-25
Sell	2.89126	7.288e-08
Uox	2.88053	0.00567
Reep6	-2.87477	3.268e-31
LOC500148	2.86056	1.915e-09
LOC681341	2.85912	5.446e-08
AABR07049783.1	2.85392	0.0206426
RGD1561778	2.84111	1.99e-10
AABR07049134.3	2.83555	0.0464348
AABR07063901.2	2.82804	1.457e-21
Cyp2b2	-2.80131	0.0174159
Gzmb	2.79834	0.001013
Cxcl3	2.79174	2.774e-05
Il1b	2.79073	1.402e-15
Icam4	2.78798	1.048e-05
Icam1	2.77813	1.638e-64
AABR07005569.1	-2.77613	0.0002037
Ldhc	2.74301	1.579e-09
Timp1	2.72893	8.813e-46
Cdh26	2.71292	1.464e-06
Oas1h	2.71064	1.168e-05
Gpr141	2.70001	0.003062
Plin2	2.69117	9.294e-14
Cebpd	2.68403	9.957e-40
Ccr2	2.64708	5.561e-06
Ms4a6a	2.64704	1.849e-19
Rnf125	2.63996	1.597e-11
Apon	2.63975	0.0143052
LOC100912564	2.63227	0.004066
RGD1307182	2.62671	2.418e-07
Bdkrb2	2.62511	1.233e-16
Trem3	2.59679	0.0001853
Mmp13	2.59071	4.602e-11
Jak3	2.58379	9.143e-57
Cst7	2.57632	1.687e-09
Atf3	2.57457	3.196e-35
Arl14	2.56322	0.000191
Osm	2.562	2.507e-11
Mcpt2	2.56046	0.0122452
Ms4a4c	2.55934	3.279e-05
Clec4m	2.55699	0.008469
Adamts4	2.53954	6.021e-36
Retnlg	2.53704	0.003729
Npy2r	2.52749	2.499e-06
Wee2	2.52567	1.323e-07
Cyp2c23	-2.52231	0.0008636
Kcng4	2.51914	7.786e-46
Ccl20	2.51778	9.277e-08
Cxcl1	2.51129	5.359e-09
Cd300e	2.51037	1.252e-08
Itk	-2.50667	6.608e-25
Sftpa1	2.49454	0.002597
Gast	2.49427	0.0158484
Cd163	2.4845	7.475e-20
Ceacam4	2.48273	0.002849
ENSRNOG00000046163	2.47719	0.0383778
LOC100912498	-2.47346	0.0103541
Nlrp1a	2.47164	1.788e-14
Gsc	2.46931	0.0019
Ch25h	2.46523	5.992e-27
Rec8	2.46406	0.0003957
Esrrb	-2.46149	7.207e-13
Hes5	-2.45953	5.329e-11
Slc25a30	2.45356	5.276e-76
Ppp1r42	2.44884	2.515e-10
Eps8l3	2.44681	2.628e-06
Lilrb4	2.43878	6.425e-08
Olr1	2.43509	3.247e-16
Tmem116	-2.43242	2.882e-19
Angptl4	2.43194	3.041e-33
LOC100360238	-2.42981	4.795e-16
Slc1a5	2.42979	5.113e-28
Srpk3	2.42444	5.845e-25
Fos	2.41831	2.599e-15
AABR07058838.1	-2.39272	7.655e-08
Trim69	2.39167	5.317e-11
Steap4	2.39096	4.811e-21
AABR07018226.2	2.38819	3.531e-07
Gadd45g	2.3879	9.404e-42
LOC108348105_2	-2.38533	0.001285
AABR07068198.2	2.38348	0.0235523
LOC100361907	2.38119	0.0404465
Rcvrn	-2.38106	4.035e-17
Mgat4e	2.37751	1.562e-08
Nxpe5	2.37149	0.002841
Il17rb	2.37025	1.995e-16
Gdf15	2.36821	1.078e-26
Reg3g	2.35004	0.00143
Btg4	-2.33851	8.961e-12
Gstt4	-2.3312	7.43e-05
Has1	2.32929	1.333e-07
LOC108351063	-2.321	2.344e-05
Spp1	2.31863	4.799e-36
Iqcf1	2.30728	0.005812
Tnni3k	2.30094	0.003623
Mmp8	2.30023	0.002966
Kif11	2.29745	1.689e-25
Ppef1	-2.28936	6.307e-11
Myo1g	2.28775	5.311e-12
Rsad2	2.28201	1.12e-13
Tnfrsf12a	2.27243	2.303e-19
LOC100909671	2.27184	0.007366
Timd4	-2.27098	0.000252
Oas1e	2.26834	7.895e-07
Nr5a1	2.25898	5.978e-05
Mmp1b	2.25314	0.0490334
Susd3	-2.24887	2.294e-23
Lpo	-2.24607	0.0002517
Npas4	2.23857	7.178e-17
Csf3r	2.231	4.183e-08
Miox	-2.22788	1.445e-13
Esr2	2.2189	4.789e-17
Fgf2	2.21707	2e-26
Cyp27b1	2.2128	9.987e-10
Plekha8	2.21114	1.32e-40
Scn10a	2.20742	0.00109
Mnda	2.20235	7.208e-09
Dio1	-2.20188	2.938e-07
LOC102554931	2.19965	0.0111987
Actg2	-2.18137	2.621e-09
A1bg	-2.18011	0.0128943
Il24	2.17429	0.0122128
AABR07056633.1	-2.17306	4.399e-08
ENSRNOG00000050453	2.17228	2.612e-23
Ibsp	2.16564	0.003729
Egr1	2.16264	2.038e-10
Treml4	2.16121	0.0291847
Pvt1	2.14602	9.35e-09
Serpinb2	2.14254	2.423e-05
Slc26a8	2.14233	1.284e-19
Scimp	2.13659	5.247e-05
LOC102552324	2.12089	0.0497608
LOC100363193	2.11642	0.00805
Fabp12	-2.11277	2.321e-11
Cfap54	-2.10932	1.91e-09
Ncan	2.10812	1.037e-17
Mmp10	2.10803	1.026e-05
Nilr1	2.10788	0.0009514
Pdpn	2.10692	8.55e-25
LOC100359752	2.10402	0.004531
Ankrd1	2.10366	4.991e-06
Hist2h4	2.09276	0.0267908
Fgl2	2.08579	9.555e-15
Tcf24	2.08247	0.0233987
Trem1	2.07925	4.39e-05
Mmp3	2.07865	4.919e-07
Tchh	2.07298	0.0113277
LOC100909605	2.07243	0.0410191
RGD1559482	2.07232	1.808e-09
Slfn14	2.06917	0.017873
Fam179a	2.06402	2.296e-11
Oas1b	2.05128	1.078e-26
Fam57b	-2.04489	6.807e-17
Depdc7	2.0393	5.747e-24
Cebpe	2.03027	0.0002904
Gpr137c	2.02524	4.134e-32
Nr2e3	-2.02119	2.493e-18
Ecel1	2.01855	1.985e-10
Sec16b	2.01237	1.275e-21
Ncf2	2.01069	2.396e-08
Samd7	-2.00447	4.536e-08
Tnfrsf9	2.00261	1.175e-18
Oscar	1.99775	0.007055
Hist1h4b	1.99368	0.0174092
Rho	-1.991	3.617e-12
Gfap	1.99081	1.661e-06
Rgs22	-1.98069	2.082e-19
Pdcd1	1.97914	0.0001473
Slc4a1	1.97822	0.0008455
Itgax	1.97211	1.508e-13
Arid5a	1.97017	4.124e-23
Mest	1.96257	2.233e-39
Nes	1.96234	1.107e-16
Gramd2	-1.96152	3.551e-19
Col10a1	-1.95686	0.0001949
Clec5a	1.95376	6.219e-08
Slc22a15	1.95313	5.467e-27
Glb1l2	-1.95023	5.823e-29
Dclk1	1.94855	6.185e-25
RGD1561143	1.94646	0.001796
Kel	1.94315	0.0371208
Trhr	-1.93533	1.527e-11
Junb	1.93531	3.433e-20
Cfap157	1.93405	1.799e-08
Clec10a	1.93001	1.519e-12
Dnmt3l	1.92992	0.0003025
RT1-CE3	1.92633	5.268e-06
Casp3	1.92619	1.227e-74
Speg	1.92539	1.281e-27
Lrg1	1.92519	3.422e-18
Gnb1	-1.92339	2.472e-15
Cxcr2	1.91873	0.001261
AC128960.2	1.91785	3.931e-06
Il18rap	1.90849	1.2e-06
LOC257642_3	1.90398	0.0142914
Clec4f	-1.89849	4.328e-05
Aqp9	1.89817	0.006708
Prtg	1.89771	1.829e-20
Dnah8	1.89659	1.563e-06
Msr1	1.89598	1.202e-08
Cp	1.89228	6.608e-25
Lbp	1.88825	1.73e-08
Psme1-ps1	1.88596	0.0132537
Vax1	1.88412	0.000453
Slc29a1	-1.87705	6.723e-28
LOC257642_1	1.86657	0.0181916
LOC100910401	-1.85292	0.041472
Nrl	-1.85085	8.961e-12
Mpa2l	1.84919	0.005724
Plaur	1.84694	5.448e-07
Fgr	1.84677	6.263e-12
Ptk6	1.84481	0.0433084
Stat3	1.84458	5.448e-32
Hrh1	1.84138	4.623e-05
Oas1i	1.83749	0.00814
Neurl3	1.83251	1.798e-08
Ankrd33	-1.82871	1.495e-10
RT1-CE16_2	1.8286	1.108e-08
Dennd4a	1.82485	1.153e-31
Relb	1.82175	4.296e-22
Ier3	1.82146	7.872e-30
Hnf4g	1.82025	0.0005677
Csrnp1	1.81347	1.057e-14
Clec4a2	1.80978	4.653e-05
F10	1.80259	5.978e-05
Mx2	1.79888	1.591e-13
Smarcd1	-1.78907	2.136e-27
Syce3	-1.78891	2.27e-05
Usp44	1.77717	0.005293
AABR07049960.1	-1.77493	0.0003165
Agxt2	-1.77065	0.009412
Ly6g5b	1.762	0.0002333
G6pc	-1.76098	0.003466
Ccdc78	-1.75929	2.867e-07
AABR07006685.1	-1.75511	0.009797
Map3k6	1.75291	1.727e-14
Ccr1	1.75221	7.516e-09
Pebp4	-1.7503	0.0282422
ENSRNOG00000059237	-1.74851	8.785e-19
Fgl1	1.7478	0.018713
Plg	1.74329	0.0110519
AABR07015015.1	-1.74291	0.0281881
Selenov	-1.74153	0.00327
Olr1106	-1.74127	0.006104
S100a9	1.74103	0.0103098
Rs1	-1.73597	5.103e-07
Loxhd1	1.7356	0.00223
Pdc	-1.734	1.804e-08
Il21r	1.72355	2.376e-06
Cfb_1	1.72074	2.797e-12
Dnai2	1.72032	1.264e-10
Hhatl	-1.72011	6.636e-10
Stx11	1.71631	2.073e-08
Slc24a1	-1.71483	2.155e-11
Slamf6	1.71466	0.006253
Asns	1.70863	4.332e-34
Itgb2	1.70811	1.5e-10
Meltf	-1.70782	0.004044
Ms4a6c	1.70414	0.0001738
LOC100360575_2	1.70408	0.0309552
Irf9	1.70377	2.445e-35
Usp18	1.70178	8.307e-12
Acan	-1.70106	0.0298067
Cd8b	1.69928	0.004963
AABR07054286.1	1.69912	0.0002234
Trpm2	-1.69883	8.059e-23
Bcl3	1.69846	2.659e-10
ENSRNOG00000038119	-1.69405	7.853e-12
Nim1k	-1.6909	2.378e-18
Ptgir	1.68715	9.535e-10
Agt	-1.682	2.827e-08
Stc1	1.67886	4.346e-23
Scd4	-1.67576	0.0435728
Egr3	1.67547	8.19e-06
Shc4	1.67227	1.076e-08
Rom1	-1.67205	8.561e-10
Hsbp1l1	-1.67055	8.848e-17
Cd207	-1.66969	0.001054
Ccr5	1.66907	2.093e-11
Klf11	1.66894	1.679e-43
FAM187A	1.66873	0.0192833
LOC688801	-1.66869	0.009267
LOC103690139	1.66722	0.007673
Cd300a	1.66141	4.725e-05
Tnip2	1.66026	8.542e-27
Prg4	1.65755	1.038e-05
Pdk4	1.65327	1.7e-05
Plek	1.65105	1.159e-12
Mmp9	1.64626	0.001472
Sema3f	-1.6449	1.114e-30
AABR07054554.1	1.64407	6.082e-06
C4b	1.63539	5.555e-05
Rps6ka2	1.6343	1.354e-24
Cngb1	-1.63345	8.526e-11
Hk2	-1.63106	8.623e-14
Hk3	1.627	5.838e-05
Ccr3	1.62527	0.00988
Stab2	-1.6209	5.632e-05
Zfp36	1.61832	6.537e-14
Tnfrsf26	1.61367	1.463e-10
Tmem221	-1.61014	0.0115929
Cd244	1.60481	1.348e-05
Slc26a9	1.60314	0.0163978
Prl5a2	1.60296	0.0163978
AABR07053509.2	1.5963	9.475e-05
Lst1	1.5923	6.383e-05
LOC691141	1.59171	1.776e-06
Wdr63	1.58998	8.672e-06
Dhrs9	1.58878	0.0006053
AABR07002001.1	1.58598	0.0163472
Ptpn20	1.58573	0.0001231
Rbp3	-1.5802	3.709e-10
RGD1564345	1.57933	0.0138634
LOC497796	1.57894	0.0009735
Samd5	1.57394	2.38e-13
Nfe2	1.571	6.707e-05
Kremen1	1.56995	4.317e-28
Atp7b	1.56821	1.579e-08
Nphp4	1.56779	1.201e-32
RT1-CE6	1.5658	2.512e-07
Adam12	1.56507	4.35e-10
Slc44a5	1.56291	3.365e-06
Fcrl2	-1.56214	8.323e-05
Pitpnm3	-1.56142	9.569e-26
Treml2	1.55928	0.004873
AABR07002623.1	-1.55796	0.005322
Itih4	1.55531	0.0126636
Jchain	1.55102	0.006756
Map3k15	1.55004	0.0282405
Fam69c	-1.54525	9.757e-12
Rpe65	-1.54191	3.525e-08
Slamf8	1.53743	8.518e-10
Cxcl2	1.53735	0.0201966
Plpp2	-1.53552	7.754e-19
Itgad	1.53142	2.523e-10
Lilrb3a	1.52988	1.045e-05
Otop3	-1.52785	0.003931
AABR07060872.1	1.52402	0.0289174
Atp8b4	1.52282	0.0001533
LOC100910163	1.52264	5.084e-09
Lrrc2	1.51629	1.089e-06
Mael	1.51567	0.039347
RGD1562660	1.51485	0.0148996
Rhd	1.51369	0.00935
Ptgs2	1.51341	1.055e-15
Cd8a	1.51312	0.002972
AA926063	-1.51007	2.749e-09
Nat8f3	-1.50627	3.357e-07
Rn50_3_0730.2	-1.50573	0.009492
Magee2	1.50569	2.858e-08
LOC108348083	1.50484	1.062e-06
Rtbdn	-1.5026	6.72e-10
Cpg1	1.50224	9.657e-08
L3mbtl1	-1.49903	4.153e-07
Napsa	1.49829	3.182e-07
Bcl2a1	1.49676	1.509e-06
Pcmtd2	-1.49531	9.361e-18
Ripply3	-1.49234	0.0002597
Aipl1	-1.49185	1.068e-08
AABR07017846.1	-1.48733	0.0274741
LOC100360821	1.48324	0.002323
Bcl2l14	1.47756	0.0171166
Rtdr1	-1.47737	0.007404
Mmd2	-1.47692	7.669e-12
Itpka	-1.47582	3.481e-06
Gadd45b	1.47372	3.158e-16
Gm9918	-1.47345	6.673e-09
Lilrb3l	1.47174	0.0001264
Hist2h3c2_2	1.47116	0.005025
Lyz2	1.46905	7.596e-09
Zfp516	1.46796	1.057e-23
Fbxo39	1.46504	0.003226
Il2rg	1.46095	1.195e-07
Adm	1.45925	1.486e-10
Clspn	-1.45482	4.687e-15
Tal2	1.45324	7.71e-05
Cyp2c11	1.44728	0.0200465
Hdc	1.44583	0.002247
Jun	1.44579	3.908e-13
Dnajb7	1.44545	6.901e-05
Il1r1	1.44144	8.481e-18
Ms4a4a	1.4332	2.095e-05
Csf3	1.43171	0.03845
Ackr2	1.4303	0.00212
AABR07005779.2	1.42723	0.0002246
Sod2	1.42684	2.113e-19
Tectb	1.42604	0.001797
Ccr7	1.42584	0.00558
RT1-CE7	1.42384	2.585e-16
Siglec5	-1.42113	4.137e-05
Hpx	1.41819	6.773e-05
Cct8l1_2	1.41302	0.0486152
Rn60_7_1078.3	1.4118	0.0402067
AABR07063901.1	1.41001	0.0246084
C3	1.4067	0.001067
Chsy1	1.40559	2.712e-21
Procr	1.4039	8.413e-07
Etnppl	-1.39771	7.848e-05
Gfpt2	1.39267	6.874e-08
Hmga1	1.39243	2.375e-10
Sema7a	-1.39236	2.476e-16
Actl7a	1.39219	0.0004289
Rrad	1.39148	0.0002383
Helz2	1.38953	2.912e-10
AABR07017159.2	-1.38597	0.002317
LOC102551435	1.38418	5.608e-08
RGD1309108	1.38311	0.0008929
Adam1a	-1.38097	3.31e-12
Myc	1.38054	8.882e-07
Rnd1	1.38036	5.328e-11
RGD1563714	-1.37922	3.045e-05
Sntg2	-1.37765	1.055e-13
Ecscr	1.37443	7.695e-10
LOC100364500	1.37426	7.168e-08
Kcnk16	-1.37422	0.0483447
Ackr4	1.3738	0.0119254
Ptprc	1.3737	2.321e-08
Ahr	1.37338	1.293e-16
Ltk	-1.36961	0.0173805
AC115369.1	1.36839	0.0007823
Spred3	1.36496	7.95e-09
Pou3f2	-1.36454	5.693e-05
Glycam1	1.36376	0.001574
Kif24	1.36105	4.691e-06
Dnase1l3	-1.36093	0.0006451
Cd80	1.36036	0.0004651
Hck	1.35947	8.46e-08
Rtp3	1.35786	0.005358
Ush1c	-1.35613	9.973e-08
PVR	1.35555	1.017e-07
Fermt3	1.35209	4.012e-10
Cds1	-1.35083	6.639e-14
Igfbp1	1.34777	0.020961
Slc14a1	1.34679	9.378e-11
Tnfsf13b	1.34207	7.917e-05
Adamts9	1.341	1.375e-11
Epor	-1.33669	6.652e-05
Ggta1	-1.33654	1.032e-05
Ftcd	-1.33591	0.002269
Apcs	1.33274	0.0005441
Gpr84	1.33223	3.097e-05
AABR07025023.1	-1.33153	2.258e-10
Il17b	-1.32891	0.0434857
Ifih1	1.32835	3.533e-09
Dnah17	1.32656	0.003998
Ifit1	1.32009	0.0002904
Dmrta1	-1.31792	0.0001479
Gpr132	1.31501	0.0006402
AABR07060133.1	1.3142	0.0208698
Cd3d	1.31258	0.0358975
Ccl11	1.31081	0.0004391
Plat	1.31079	1.7e-14
Sbno2	1.31049	5.203e-17
C5ar1	1.3083	2.508e-06
Rspo4	-1.30743	0.001261
Siglec10	-1.30656	0.00774
Klhl29	1.30334	4.31e-28
Gngt1	-1.30323	7.917e-05
Cfi	1.30186	0.0239995
Mroh2a	1.3015	0.0101207
Ccdc113	-1.30133	8.79e-07
Gcsam	1.29921	0.006045
Tnfaip6	1.29629	6.931e-11
Pcsk4	-1.2953	7.774e-11
Cebpb	1.29442	0.0005348
Htra4	1.29256	0.0005308
Fblim1	1.29018	7.02e-09
Trpa1	-1.28973	0.005436
Ms4a6e	1.289	0.001661
Clec2d2	1.28824	0.0164629
Arl4d	-1.28648	7.929e-14
Cxcl17	1.28632	0.0001067
Socs2	1.28601	3.807e-10
Oasl2	1.28447	0.0006289
Ccl19	1.28299	0.0002991
Agtpbp1	1.28286	3.166e-16
Spi1	1.28246	1.157e-07
Slc14a2_2	-1.28234	0.0117917
March1	-1.28089	4.052e-07
Folh1	-1.27907	0.002474
Gpr37	-1.27462	2.117e-10
Dok2	1.27093	2.354e-05
Csf1	1.27086	1.911e-20
Sh2d1b	1.26992	0.000929
Lrrc25	1.26794	1.516e-06
Faim_2	-1.26784	7.759e-13
Cxcl6	1.26763	0.0263266
Pkd1l1	1.26608	0.0290534
Samd3	1.26491	0.044261
Cdr2	-1.264	2.467e-13
Sfrp4	1.26296	0.004184
Ces1f	1.26285	0.0375814
S1pr3	1.26008	7.852e-13
Msi1	-1.25979	1.99e-10
Maff	1.25939	1.73e-08
Serpina1	1.25636	0.0225512
Cabp4	-1.25153	1.303e-07
Qsox1	1.25133	3.518e-13
Unc119	-1.24731	5.505e-08
Nkd1	-1.2447	5.565e-11
AABR07051515.2	-1.24466	0.0197574
Cd22	1.24309	0.0015
Klf10	1.24202	6.418e-15
Gpr63	1.24156	2.473e-06
Naa35	1.24152	3.441e-19
Shox2	-1.24053	0.0170368
AABR07021804.1	1.24035	0.0212272
RGD1597339	-1.23925	5.206e-10
Cd200r1	1.23859	0.0002722
Ctrc	1.23727	0.008194
Pzp	1.23254	0.004305
Pik3r5	1.23112	9.026e-06
Dhx58	1.22927	1.237e-07
Ltb4r	1.22642	0.0212427
Hspb9	1.22573	0.0309668
Spn	1.22529	0.000161
Gja5	1.22521	0.002049
Gpr65	1.22496	0.002024
Tyrobp	1.22332	6.611e-08
LOC100911215	1.22177	0.0221428
RT1-M6-2	1.22123	0.0281096
Cd93	1.21768	8.782e-08
LOC102550892	1.21736	0.0003052
Gpr151	1.21728	0.0181682
Tnfsf8	1.21459	0.0335823
Cldn6	1.21334	0.0162677
Ankrd2	1.20992	0.002995
Nlrp3	1.20848	4.137e-05
Mefv	1.2073	0.0002849
Rgs14	1.20618	0.002849
Map3k8	1.20528	1.014e-06
Tmprss5	-1.20504	0.004075
Mt1	1.20478	1.482e-08
S100a3	1.19966	0.004584
Cd83	1.19838	2.735e-09
Cytl1	-1.19802	0.0322612
Pcdhb6	1.19717	0.0203236
Prr7	1.19708	0.0001245
Tnfrsf1a	1.19411	4.088e-11
AABR07032751.1	1.1941	0.007804
Nlrc5	1.19106	7.032e-06
Agtr1b	-1.18943	0.022522
Mettl1	1.18939	2.934e-08
LOC691215	-1.18888	0.006219
Efhd1	-1.18691	4.931e-10
Fscn2	1.18626	7.248e-09
Pla2g3	-1.18511	0.0163742
Rn50_13_0801.2	1.18262	0.005554
Cd44	1.18048	1.856e-11
P2ry6	1.18019	1.348e-05
Rcan1	1.1771	3.31e-13
Rhebl1	1.17707	4.179e-08
Lonrf3	1.17616	1.29e-12
Slc22a3	-1.17432	0.0102838
Rlbp1	-1.17417	1.999e-07
Zfp697	1.17364	0.0004847
Btc	1.173	5.953e-08
Vax2	-1.17163	0.000202
Itgal	1.17019	1.112e-05
Sema6c	-1.16764	2.437e-10
Fam110d	1.16763	4.426e-08
Jaml	1.16733	0.0001195
Anks4b	1.16688	9.497e-05
Nfkbie	1.16604	3.321e-10
Pstpip1	1.1659	0.0003291
Kcnj14	-1.16462	5.002e-07
Gnb5	-1.16429	6.854e-09
Fosb	1.16345	8.154e-05
Hcls1	1.16331	2.77e-06
Tnfsf9	1.16296	0.007711
Glipr2	1.1624	1.106e-06
Slit3	1.16153	2.935e-10
Icos	1.16151	0.0433458
Ttc39c	-1.16089	2.111e-19
LOC100912365	1.15894	0.009628
Lamp3	-1.15864	2.116e-06
Arhgef33	-1.15738	9.93e-05
Cd3e	1.15585	0.0250702
Xrcc3	-1.15566	0.0001848
Peg12	1.15545	0.002739
Zc3h12d	1.15516	0.0005147
Cmtm5	-1.15445	6.599e-05
Anln	-1.15198	0.001268
Tbx4	1.1519	0.005191
Msn	1.15177	1.055e-13
Tspan4	1.14831	5.522e-10
RGD1308750	1.14574	0.0004468
C4bpb	-1.14519	5.637e-05
Abca4	-1.14477	3.14e-08
AABR07051515.1	-1.14452	0.0218026
Lsmem2	1.14264	0.008665
Fam135b	1.14257	1.579e-09
Tfpi2	1.14253	5.502e-05
LOC100364027	-1.14247	0.0002854
Espn	-1.14223	1.166e-06
Dao	-1.13934	0.0346402
Pnlip	-1.13921	0.001501
Rrp1b	-1.13857	3.747e-12
Atf7ip2	-1.13847	0.0183612
Fam188b	1.13833	1.506e-13
Tmprss6	1.13721	0.009317
Sh2d2a	1.13696	0.0376235
Irf2bpl	1.13576	1.075e-21
Fam53b	-1.13529	8.252e-14
Ccdc77	1.13348	0.0244592
Igsf6	1.1329	8.196e-05
Mrc1	1.13276	4.917e-06
Xirp1	1.13261	0.040696
Apoa5	-1.13194	0.006662
Dusp5	1.13162	1.445e-10
Tcam1	-1.12978	0.003525
Drd4	-1.1297	2.075e-06
Adamts1	1.12917	2.515e-10
Nkain1	1.12911	0.002429
Mak	1.12721	4.754e-11
Gal	-1.12703	0.002823
C3ar1	1.12575	0.0004371
Pde6g	-1.12562	4.556e-05
LOC680910	1.1256	0.0230942
Carhsp1	1.12536	1.398e-10
Serpine1	1.12453	0.0001185
Cd300lb	1.12433	0.0159868
Nek10	1.12335	0.0278151
Tmem106a	1.12322	8.957e-07
Sec14l5	-1.12046	0.0168671
A2m	1.1203	1.102e-07
Grk1	-1.11868	1.086e-05
Rn60_1_2212.3	1.11867	0.0136995
Sctr	-1.11772	2.975e-05
Gbx2	1.11681	0.00255
C4bpa	1.11639	0.0163472
Ift57	1.1151	5.657e-16
Cxcl9	1.11328	0.004775
Ly6l	1.11222	0.008292
Rhpn1	-1.11218	3.114e-19
Anlnl1	-1.11116	0.003424
Optn	-1.11106	2.585e-16
Rn60_8_0242.1	1.11066	0.0161929
C1s	1.10984	2.353e-07
Sbk2	-1.10947	0.0001071
Tsks	-1.10933	1.955e-05
Chst3	1.10877	0.0005719
RGD1565166	-1.10575	0.0005947
Aspnl1	-1.10412	0.007467
Ranbp3l	-1.10331	0.006613
Nupr1	1.10254	0.001105
AC125248.1	1.10152	0.0006092
Ccdc155	-1.10101	5.752e-07
Stat1	1.10039	1.306e-11
Rnf151	1.10018	0.003415
Prss56	1.09982	0.002898
AABR07027431.1	-1.09923	0.0367945
Rdh12	-1.09884	1.789e-07
Wisp2	-1.09879	0.0155408
AABR07027137.1	-1.09859	0.0119002
Pde8a	-1.09817	8.484e-08
Pla1a	1.09785	1.039e-05
Kmo	1.09689	0.0392666
Rab32	1.09639	4.36e-12
Sh3d21	1.09513	6.64e-05
LOC100910669	1.09497	0.0274741
Ctxn3	-1.0942	2.017e-05
Fgg	1.09412	0.0474825
AABR07026986.1	1.09298	0.010497
Alox5ap	1.09271	1.225e-05
Slc15a3	1.092	2.256e-06
Sash3	1.09188	0.0005956
Ccdc96	-1.09128	2.166e-05
Aldh1a7	-1.09032	0.0164834
Slc17a7	-1.08956	2.073e-08
Timp4	-1.08914	0.00988
Plk3	1.08902	3.151e-05
Adamts7	-1.08873	2.375e-10
Kcnj10	-1.08841	4.06e-06
Fgfbp1	-1.08803	0.003316
Adcy4	1.08758	1.818e-06
Tgif1	1.08713	1.958e-07
AABR07017902.1	1.08682	0.0148995
Degs2	-1.08556	0.003139
Chl1	1.08532	3.182e-07
Fgf7	1.08498	0.0115929
Nudt15	1.08414	6.39e-05
Alpl	-1.08413	4.504e-10
Medag	1.08277	0.0007154
Nos3	1.08199	1.794e-09
Il2rb	1.08178	0.006085
Spsb1	1.08146	1.221e-07
LOC100911548	1.08104	1.601e-07
Fcgr1a	1.07992	4.172e-05
Capn3	-1.07966	9.545e-09
Smc1b	1.07949	0.0438624
Il1r2	1.07916	0.0309532
AABR07066416.1	1.07882	0.0396428
LOC308990	1.07642	0.001563
LOC100909913	1.07598	1.123e-07
Tulp1	-1.0758	4.37e-07
Coro1a	1.07412	9.391e-06
Ifi44	1.07262	9.909e-11
Pmaip1	1.07228	1.679e-09
Nabp1	1.07185	1.517e-07
Il6st	1.0718	1.513e-18
Slc25a35	-1.07167	4.088e-11
RT1-DMb_1	1.07106	0.0001465
Pfkfb2	-1.07105	2.022e-11
Maats1	1.07099	0.008041
Tlr13	1.07039	9.78e-05
RGD1304622	1.06799	1.161e-10
Car14	-1.06623	2.975e-09
Dio3	1.06506	0.001497
Pcdhgb6	1.0642	6.449e-09
Cyp2d4	-1.06054	1.296e-06
Tma7	-1.06041	8.844e-08
Vav1	1.06035	0.0001575
Dusp8	1.05901	2.638e-18
Tlr12	1.059	0.0360763
Runx3	1.05845	0.006561
Myb	-1.05841	0.0006185
Ipo5	1.05802	2.377e-12
Clca4	-1.05757	0.0492074
Plch2	-1.05697	1.607e-12
C1rl	1.05638	0.0001667
Polg2	-1.05631	4.528e-08
Ttk	-1.05592	0.0003172
Cd53	1.05339	6.017e-06
Kcnn4	1.05063	0.004981
Tfec	1.04995	0.003066
Ubtd1	-1.04962	2.341e-15
Prc1	-1.04953	1.211e-11
Socs1	1.04862	5.741e-06
Btk	1.04389	0.002995
AABR07047256.1	1.04363	0.0004958
P2ry10	1.04164	0.0136995
AABR07063829.1	1.03976	0.0221283
Impg1	-1.03461	1.075e-05
LOC100912611	-1.03371	0.000264
Herc6	1.03294	4.283e-12
Actl7b	1.03234	0.0384479
Krt71	-1.03154	0.0139552
Spry2	1.03119	8.008e-11
Clec9a	1.03063	0.003271
Casp12	1.03055	0.001841
Tlr10	1.03049	0.007567
Impdh1	-1.03048	6.946e-10
Guca1a	-1.03009	0.0004355
Tril	-1.02926	4.474e-09
Lvrn	1.02905	0.0166763
LOC100359600	-1.02836	2.909e-08
Tas1r3	1.02727	0.0346604
Chka	1.02721	1.059e-11
Hgf	1.0266	2.601e-09
Herc3	-1.02518	5.176e-06
Lrrc74b	-1.02454	0.0308906
Serping1	1.02397	1.691e-07
Wdfy4	1.02244	0.0002739
S1pr4	1.0221	0.024748
Tmem100	1.02113	0.001274
Slc38a3	-1.01919	7.987e-07
Slfn13	1.01837	3.439e-05
P2ry12	-1.01631	0.001017
Chrnb4	1.0148	1.148e-05
Ghrhr	-1.01303	0.0435675
Mlf1	1.00942	2.061e-05
Cnpy1	-1.0093	0.0340568
Trim47	1.00899	1.019e-05
LOC108348047	1.0087	4.551e-05
Scg2	1.00815	3.784e-06
Glipr1	1.00708	0.0002737
Enc1	1.00634	2.322e-08
AABR07060862.1	1.00436	0.0009129
Dlc1	-1.00371	3.532e-11
Cyp4b1	1.00365	0.0369552
Cyth4	1.00221	1.335e-05
Ikzf1	1.0008	0.0005683
Slc6a12	0.999074	0.001345
Ankrd6	0.998858	7.2e-14
Ctsz	0.998109	1.076e-08
Lca5l	0.995657	0.0433084
Sox30	0.995629	0.0484317
Vcam1	0.994573	4.592e-06
Arhgap25	0.992793	0.0002021
RGD1564171	0.991663	0.001185
RGD1563222	-0.991002	0.0136995
Lrit3	-0.990938	0.0001462
Slc7a10	-0.990916	3.033e-05
Nr5a2	0.989623	0.0107189
AABR07065406.2	0.989174	0.022977
Ggn	0.988529	0.0003735
Tap1	0.987855	2.826e-06
Tifa	0.986968	2.602e-11
Zfp951_2	0.986156	0.0005185
Cerk	-0.985325	7.381e-10
RGD1304963	0.984808	2.506e-07
Ccdc13	-0.98476	0.001455
Aurkb	-0.984377	0.0169027
Fstl3	0.982707	0.004647
Fcer1g	0.982427	1.894e-05
Ppef2	-0.981895	2.354e-05
Dnmt3b	0.9818	0.0001254
Ankrd33b	-0.981779	2.351e-06
Arhgap9	0.980359	0.0004219
Rhpn2	-0.979893	2.77e-06
Hmgb2l1	-0.979696	1.085e-07
Sstr3	0.979539	0.0003918
Srxn1	0.979537	5.838e-06
Rapgef5	-0.979358	6.211e-06
Fscn3	0.979057	0.006427
Ddx58	0.978698	2.129e-05
Slc27a6	-0.978548	0.0324279
Plcd3	-0.978216	5.706e-10
Ciita	-0.977367	6.327e-07
Nkain4	-0.977336	0.0168726
Cass4	0.976931	0.0183241
Omg	-0.975866	2.761e-05
Il1rap	0.973238	3.605e-09
Pla2g5	-0.973124	1.145e-09
Cplx4	-0.972971	9.78e-05
Gcnt4	0.970133	0.0003033
Ms4a6bl	0.968987	0.0189954
LOC103689996	0.968689	0.000131
Ric8b	-0.967582	7.083e-08
Rab20	0.967518	2.846e-06
Lamb3	-0.965493	0.004713
Tshr	0.965364	5.312e-07
Tmem74b	0.964147	0.008325
Slc16a1	-0.963716	1.053e-12
Igsf9	-0.962712	9.087e-06
AABR07002674.1	-0.962533	0.0127473
Padi2	-0.962324	2.658e-06
Ccdc126	-0.961664	1.362e-06
Crhbp	-0.961429	0.0291847
Gja4	0.961014	8.392e-05
Parp3	0.960863	9.704e-10
AABR07030498.1	-0.958596	0.0195642
Mob3c	0.958366	4.232e-05
Akr1c14	0.958147	0.0003491
Kcnmb1	-0.957547	0.0250107
Creg2	0.954688	0.019089
Megf10	0.954321	2.812e-09
Mab21l1	0.953684	4.338e-12
Flt1	0.953236	9.385e-11
Clec4a3	0.953011	0.004712
Gpr183	0.952457	0.0002471
Crem	0.952303	3.845e-08
Igtp	0.952062	3.706e-08
Ephb1	-0.951767	1.036e-05
Ier5l	0.951006	4.232e-05
Otub2	-0.950935	3.168e-10
Nxnl1	-0.950563	0.0001237
LOC103691744_1	-0.949576	0.0003263
Sfxn2	-0.94652	7.882e-06
Itga4	0.944334	0.001455
Cxcl13	0.944317	0.0237752
Rgs1	0.944295	0.0231942
Gucy2f	-0.941147	0.002702
Slc9a8	0.941101	2.96e-16
Pipox	0.940823	0.0380397
Pih1d3	-0.940144	0.0002814
RT1-A2	0.939716	3.103e-05
Tcfl5	0.938138	0.037441
LOC100912293_3	0.937947	0.0416811
Spib	0.937301	0.0391396
LOC500227	-0.936103	3.98e-05
Wdr31	-0.935569	1.892e-05
Nrros	0.934033	0.0004855
Ndrg3	-0.93278	3.017e-09
C5ar2	0.932541	0.008
Uckl1	-0.931412	1.195e-08
Mat2a	0.930944	7.445e-08
Lyve1	0.930332	0.0172148
Shisa2	-0.929903	0.0218026
Arhgap30	0.927797	0.001486
Glul	-0.927604	2.265e-07
Col27a1	0.927477	2.702e-05
Lgals3bp	0.927468	1.268e-06
Shisa3	-0.927114	0.0110083
Asxl3	0.926766	0.0003734
Slc26a3	0.925639	0.0069
Crb1	-0.92562	0.0003165
Sdr16c5	-0.925573	0.005599
Nlrc4	0.924041	0.0203802
Tagap	0.922879	0.00947
Spc25	-0.922498	0.001859
Espl1	-0.920719	0.008626
Cyp11a1	-0.920543	0.0271622
C4a_2	0.920143	0.0008022
Bbs9	-0.919572	1.788e-05
Agpat3	-0.918767	2.078e-05
Stk32a	0.917947	5.169e-08
Dtx3l	0.917691	4.678e-07
Htr2b	0.916735	0.0433084
Tlr7	0.916503	0.002627
Galns	0.916126	2.975e-05
Siah3	0.913944	0.001495
Pth2r	-0.913262	0.0248735
Wnt5b	-0.912647	0.007213
Scara3	0.912143	6.769e-08
Smim24	-0.911288	0.0002273
Sphk1	0.910599	0.0199237
Hnf4a	-0.910223	0.000381
Dscaml1	-0.908863	1.17e-08
Slc7a11	0.908047	1.41e-05
Dpf3	-0.906786	2.27e-06
Lcp1	0.905525	1.864e-05
Rftn2	-0.90493	0.001005
Gpr88	0.904328	1.053e-05
Nfkb2	0.903168	2.704e-05
Nfam1	0.902329	0.0008417
LOC108348118	0.90135	3.617e-12
XAF1	0.898662	0.0002794
Armc2	-0.898406	2.599e-05
Kcnip2	-0.897224	8.21e-05
Slc6a6	-0.897029	2.27e-06
Ptrh1	0.896397	0.0002131
ENSRNOG00000051922	0.89626	9.876e-09
Clec4a1	0.89581	0.00454
Pde6c	0.895341	8.767e-08
Mybl2	-0.894182	0.0295572
Ifi44l	0.892907	0.003296
Zdhhc12	0.892424	2.296e-08
B4galt5	0.89235	6.884e-11
Pnldc1	0.892014	0.00995
Slc26a2	0.891583	1.902e-08
Guca1b	-0.889454	0.001204
Cep250	-0.888674	3.668e-12
Hivep2	0.88781	9.098e-11
Odf3b	-0.887723	0.0233073
Myd88	0.887465	1.167e-07
LOC100360218	0.88727	0.001105
ENSRNOG00000047276	-0.886319	1.189e-08
Tars	0.885057	5.317e-11
Hepacam	-0.884507	0.0235666
Gldc	0.884097	1.34e-08
C1r	0.884026	1.261e-05
Nox4	0.882043	0.0111559
Faap100	0.881922	3.426e-06
Ncaph	-0.881107	0.008028
Dnah9	0.880546	0.0117389
Gap43	0.880304	0.0001518
Ebpl	-0.879339	1.006e-06
Taf4b	0.879262	1.673e-10
Trim25	0.878962	8.24e-07
Eif2ak3	0.878904	3.108e-10
Rad9b	0.877137	0.000123
Pax4	-0.876308	0.0003939
Gnb3	0.875997	7.8e-08
Odc1	0.875742	1.272e-11
LOC102556148	-0.875494	0.009475
LOC100364062	-0.873459	0.000956
Adcyap1	0.873458	0.0120251
LOC100911776	-0.873334	0.008271
Pomc	0.871741	0.002888
Crlf1	-0.871477	0.0368403
Ect2	-0.871463	0.0005897
Btbd17	-0.870416	0.00302
Stard10	-0.869061	5.398e-09
LOC108348055	-0.868149	0.0103741
Camsap1	-0.867977	5.969e-10
Slc43a1	0.865914	0.0486152
Nog	0.865254	0.0200113
Ptpn1	0.862959	5.313e-08
Naip6	0.861658	0.0136434
Rasal3	0.860279	0.004752
Msh5	-0.859827	0.0005791
Sox8	0.858392	0.0001034
Cnga1	-0.855107	0.0006982
Ccdc71l	0.854871	0.0134464
Il1rl1	0.854764	0.0374006
Cntnap5b	0.854631	0.00639
Sesn2	0.854452	2.248e-08
Igf2bp3	0.854425	0.0278097
LOC100911825	0.854256	1.71e-05
Cenph	-0.852416	0.0236479
Adamts3	-0.851918	0.0001066
Rhoh	0.851459	0.0255268
LOC100360940	0.851064	0.003265
March3	0.850564	2.095e-05
Sla	0.850483	0.000866
Nusap1	-0.850183	0.0167585
Gpr171	0.849601	0.0408856
Neurod1	0.849004	8.877e-10
Fam184b	-0.848748	0.0003964
Col2a1	-0.847185	1.605e-05
Derl3	0.846471	0.0485292
Clec7a	0.845322	0.003499
Rgs9bp	-0.845253	0.001044
Parp9	0.845075	1.191e-06
Xiap	-0.84408	2.826e-07
Llgl2	-0.84356	9.995e-09
P4ha3	0.841722	0.0374602
Cc2d2a	-0.841114	0.000407
Myom2	-0.84066	0.0182243
AABR07070043.1	-0.840586	0.0310208
Ube2l6	0.840089	2.184e-05
Mthfd2	0.839703	0.0005506
Il15ra	0.839101	0.0290953
Ifrd1	0.838912	1.692e-07
Etv6	0.838555	6.901e-06
Slc10a5	0.838527	0.0254097
Cpe	-0.837554	9.953e-06
Il13ra2	0.837253	0.007592
LOC100911068_2	0.837147	0.0003873
Ncapg	-0.835861	0.0166412
Mpp4	-0.835691	0.0006185
Calml4	-0.833112	0.001979
Ppp1r1b	-0.832646	3.176e-05
Eno4	0.832618	0.002557
Exo5	0.831041	9.133e-07
Sp7	-0.830512	0.006768
Apoc1	-0.829576	0.0233006
Dhrs11	-0.829551	1.924e-08
Osbp2	-0.829419	1.828e-05
Myh6	-0.828217	0.0282166
Acsm5	0.827914	0.0354073
Hcn1	-0.827652	8.537e-05
Adra2c	-0.82724	0.001944
Dbndd2	-0.827053	1.984e-10
Plpp4	-0.826462	0.0253146
Haghl	-0.825528	0.0002285
Sertad1	0.825123	1.036e-05
Dram1	0.825077	0.0007103
Camk1g	-0.824971	0.0006986
RGD1563365	0.822457	2.145e-08
Pla2r1	-0.822353	2.759e-05
Wif1	-0.821392	0.004616
Lcp2	0.821357	0.001755
Tmem119	-0.821315	0.0006462
Pde6h	-0.820076	0.0465236
Rin3	0.819915	0.0001756
Cdan1	-0.819707	1.886e-08
Tp53	0.818693	8.782e-08
Parvg	0.81806	0.0184556
Pde6b	-0.817337	0.004315
Btbd3	0.817206	2.602e-07
Arl3	-0.817184	1.563e-06
Ngfr	0.816777	0.001532
Rdh11	-0.816742	8.214e-05
Glis3	0.816284	0.0004478
Cdkl4	0.815707	0.0486613
LOC108348052	0.813928	3.787e-06
Crocc	-0.813369	0.000111
Stox1	-0.813188	0.0487782
Sh3pxd2b	0.813032	0.0001209
Saxo2	0.812794	0.0183851
Sfmbt2	0.811901	0.0393052
Depdc1	-0.811004	0.039393
Kdr	-0.810393	9.695e-06
Doc2b	-0.810058	0.001233
LOC103692719	0.80966	1.528e-05
Csf2ra	0.809432	0.001145
Kcne5	-0.809312	0.0332285
Ifitm1	0.807902	0.0404465
AABR07002870.2	0.807578	0.03433
Sh2d5	-0.807481	6.188e-06
Rrp12	0.807072	2.416e-10
Sema3a	0.806876	5.444e-06
Mafb	0.805193	7.335e-05
Pkm	-0.805116	1.422e-05
Efemp2	0.804664	8.634e-09
Casp4	0.8045	0.001327
Mesp2	-0.804382	0.043627
Rcl1	0.803917	5.3e-06
Cdca3	-0.803375	0.0404376
Ppp1r10	0.803187	2.615e-09
Jak2	0.800829	9.638e-08
Lmod1	-0.800351	1.019e-05
Fezf1	0.800228	0.0238184
Taok3	-0.799694	6e-11
Alox5	0.799634	0.0444912
Pcdhga11	0.799455	0.0002339
Clgn	-0.798899	0.0138752
Abcg4	-0.798537	2.246e-06
Vopp1	-0.79815	2.114e-05
Ccr9	-0.798116	0.00692
Fzd9	-0.79757	0.0138358
Amotl2	0.797448	8.518e-10
Faah	-0.797113	0.001187
Rubcnl	0.797076	0.0117038
Gbp2	0.79653	0.0207263
Impg2	0.795402	0.0003376
Bub1b	-0.795341	0.0449505
Asf1b	-0.794465	0.025708
Epb41l2	-0.794103	3.87e-05
Htr1f	-0.79402	0.0193843
Flrt3	0.793124	4.614e-07
Lrriq3	0.791459	0.0386812
Psat1	-0.791314	1.534e-05
Nat8f4	-0.790809	0.0156678
Plxnb1	-0.790738	1.232e-09
Rgs20	-0.790591	2.768e-07
Ppard	0.790586	6.73e-09
Fcgr3a	0.790204	0.0475894
Noct	0.790168	4.691e-05
Lmo2	0.788881	1.383e-06
Chac1	0.788583	5.978e-05
Ifitm10	0.788446	0.001118
Glmn	-0.788417	2.684e-07
Car2	-0.788055	0.0004944
Tmem138	-0.787485	9.8e-05
Ptpn7	0.787248	0.004823
Slitrk2	-0.786816	9.733e-05
Rdh5	-0.78646	0.003345
Esco2	-0.785338	0.0001097
Fads6	-0.783912	0.0003688
Ms4a8	-0.783321	0.045324
Lrrc8b	-0.783169	3.969e-07
Frmd4b	-0.78228	4.498e-05
Gmfg	0.781584	0.00293
Cdkn3	-0.781431	0.0201636
Mamdc2	0.780452	1.335e-05
Hlx	0.779668	0.009981
Enox1	0.779048	4.682e-06
Ptprz1	0.778614	0.000272
Havcr2	0.777277	0.0286683
Cdhr1	-0.777215	0.001231
Katnal2	-0.777089	0.0212523
Crx	-0.77526	0.0001441
Sult1d1	-0.774825	0.0003532
Samd11	-0.774133	0.005286
Cav1	-0.774018	1.027e-07
Cd14	0.773888	0.008809
Ptpn12	0.773301	1.15e-10
Clu	0.77322	0.0005956
Rasgrp4	0.773208	0.0433743
Icmt	-0.772574	1.805e-06
Litaf	0.771851	3.784e-06
Casc4	0.771598	3.647e-05
Cybb	0.771294	0.0006697
Ypel2	-0.771151	5.307e-08
Ntng2	-0.77062	3.799e-05
Bmpr1b	-0.770584	0.002552
Slco4a1	-0.769676	3.326e-05
Mdga1	0.769571	6.686e-05
Dennd2a	0.768941	3.313e-06
Kctd14	0.767944	0.0003025
Nek6	0.767838	3.182e-07
St8sia2	-0.767325	0.0282405
Gstt3	-0.764902	0.0001071
Emilin2	0.763827	0.002018
Phf11b	0.763752	0.007519
Arhgap8	0.763537	0.003296
Top2a	-0.763171	0.0408158
Irak3	0.762969	0.0003905
Snta1	-0.762551	6.482e-06
Samd4a	0.761215	3.757e-07
Prdm9	-0.760754	0.006725
Gimap9	0.759808	0.004999
Eif2ak2	0.758869	3.365e-06
St8sia1	-0.758647	0.0003423
Gem	0.757338	2.557e-05
Flot2	0.757228	9.995e-09
Gabra1	0.756984	1.608e-06
Il17ra	0.755214	0.0002837
Pde8b	-0.755162	6.981e-05
Add1	-0.754732	4.134e-07
Yif1b	-0.754727	0.003435
Ier2	0.754672	5.743e-05
Fbxo17	-0.754647	0.0416224
Lama1	0.753802	0.0433084
Ccdc28b	-0.753354	3.081e-05
Frmd4a	0.753148	3.787e-06
Apom	0.752837	0.0286502
Mars	0.751982	9.129e-10
Zdhhc2	-0.751889	0.0001949
Zfp36l2	0.75102	1.323e-07
Rgs16	0.750936	1.087e-05
Cttnbp2	0.750596	1.119e-06
Tmem237	-0.750241	1.038e-05
Shmt2	0.749806	1.264e-08
Kif4a	-0.749245	0.0112691
S100a4	0.74919	0.0212053
Chd7	-0.747579	2.287e-06
Asrgl1	-0.747086	4.879e-06
Aass	-0.746952	0.0002008
Rnd2	-0.746595	3.51e-05
St3gal1	-0.746423	4.366e-09
Metrn	-0.74532	0.001016
Il4r	0.74465	0.00154
Tnfrsf10b	0.743919	0.0155424
Hbegf	0.743051	0.0002035
Ceacam1	0.74293	0.022522
Pml	0.741231	7.046e-07
Ifnar2	0.739417	3.957e-05
Zfp385a	-0.73868	0.0001479
Fas	0.7385	0.0004855
Zfp385b	-0.738349	2.859e-06
Itsn2	-0.737844	1.066e-05
Elovl4	-0.737295	0.003364
Was	0.737207	0.0311571
Spsb2	0.736826	3.461e-06
Birc3	0.736766	0.0328122
Ubash3b	0.736404	4.557e-06
Eml3	-0.735886	3.459e-07
Rn60_17_0763.1	-0.735465	0.014865
Arr3	-0.73472	0.0308459
Tmem108	-0.734013	5.964e-05
Mt3	-0.733402	0.0279957
Nqo2	-0.733357	0.0168727
Ets2	0.733319	3.081e-05
Dusp14	-0.73321	5.453e-06
Plpp3	0.732983	3.293e-05
Isg15	0.732098	0.0256775
Ercc1	0.73156	3.373e-06
Lhx1	-0.731321	0.0113277
Rad54b	0.731312	0.0382732
AABR07001591.1	-0.730953	0.0407298
Pcdhga9	0.73048	0.0003425
Apbb1ip	0.730268	0.005272
Ttc16	0.729976	0.0328445
Piezo1	0.728804	0.0001323
Cdh17	0.72847	0.0397184
Myoc	-0.728196	0.006686
Kif19	-0.728049	0.0001386
RGD1565033	-0.727838	7.012e-05
Stard9	-0.727604	0.003271
Cmpk2	0.726457	2.864e-05
Sowaha	-0.725718	0.017167
Adamts17	0.725412	0.0420414
Map1b	0.725272	0.0002716
Pik3c2b	-0.725071	0.001896
Epha7	0.723952	4.557e-06
RGD1311805	-0.72367	2.902e-08
Nfkb1	0.723078	8.769e-08
Il13ra1	0.722879	0.0001468
Tmem252	0.722211	0.0130667
Slc4a7	-0.721553	1.404e-05
Axl	0.721328	0.0008162
LOC102553814	-0.721313	0.0221785
Sgip1	-0.720655	0.0005039
Cdk1	-0.71872	0.0396491
Mfhas1	0.717945	4.513e-07
Fosl2	0.717662	0.0412409
Rabgef1	-0.717338	1.684e-05
Klhl4	0.717035	0.0001756
Eng	0.71662	0.0003416
Trex1	0.716067	4.918e-06
Hmgn2	-0.715426	7.491e-05
Scfd2	0.715415	8.703e-06
Tram2	0.715396	0.0154739
Pdgfra	0.715382	0.0005494
Sox7	0.712878	0.0378183
Abhd14b	-0.712864	2.298e-09
Kirrel	-0.712666	1.138e-08
Srd5a1	-0.712509	4.879e-06
Racgap1	-0.71173	0.0389956
Mtmr11	0.711614	0.0002701
Rtp4	0.711291	0.0497598
Mier2	-0.710816	9.324e-10
Cdc20	-0.710782	0.0118857
Tnfrsf1b	0.710735	0.002499
Dennd3	0.710657	6.552e-05
Cks2	-0.71029	0.006849
Olfml3	-0.709915	0.000333
Cnnm4	0.709846	2.145e-08
AABR07035796.1	0.709834	0.0105346
LOC100909712	0.709518	2.095e-05
RT1-CE1	0.70531	0.008553
LOC100911492	-0.704387	2.354e-05
Mtcl1	-0.702781	6.462e-05
Rnf19b	0.702714	4.196e-07
Acadm	-0.702555	2.961e-05
Gucy2d	-0.702488	0.002671
Rassf4	0.702477	3.85e-05
Hs3st2	-0.702012	0.0437597
Tmem86b	0.701276	0.0316778
Mok	-0.701128	0.001261
Calr4	-0.701091	0.0496695
Tk1	-0.700805	0.002602
Kcnj13	-0.699417	0.0001883
Vsx1	-0.699196	0.001296
Zcchc12	0.699054	7.483e-06
Xdh	0.698084	0.0154823
Slc16a14	0.697594	0.004066
Pfkl	-0.697186	5.801e-05
Sec22c	-0.697073	3.87e-05
Hspa1a	-0.696823	0.001542
Zc3hav1	0.696741	0.0001624
Svop	-0.696463	9.8e-05
RGD1560289	0.695544	0.0477434
Nov	-0.695261	0.0126079
Ttyh1	-0.695233	0.0002095
Unc5b	0.694896	3.162e-05
Otx2	-0.694625	4.172e-05
Ifi27	-0.694378	0.0239368
Pde6d	-0.694285	1.894e-05
Morn1	-0.694231	0.0001243
Hdx	0.693323	0.0451622
Bmp15	0.692667	0.001105
Ptgis	0.692409	0.0004072
Arl16	-0.692077	2.201e-05
Cmc1	0.691525	0.001975
Fgfr1	0.691206	2.438e-06
Mocos	0.691044	0.0261017
Gsap	0.691008	0.0116157
Kcnh1	0.690898	0.000321
Gpld1	-0.690127	0.0003724
Col6a5	0.689841	0.0260624
Zfp238	-0.689416	1.906e-06
Synpo2	-0.689143	0.009604
Thg1l	0.689077	1.053e-05
Kif26b	0.688679	0.007407
RT1-CE4	0.688484	0.0009346
Krt19	-0.688328	0.0360763
Ralgds	0.68826	8.964e-05
Nr1d1	0.688244	1.412e-06
Il10ra	0.687953	0.0386814
Btg2	0.687408	3.642e-05
Slc12a4	0.687083	6.089e-05
Twist1	-0.686459	0.0147806
Mdn1	0.686378	4.768e-07
Adgb	0.68557	0.0103541
Rrh	-0.685452	0.0003882
Kpna2	-0.685263	2.376e-06
Lrrc46	-0.684647	0.000878
Car6	-0.684207	0.009007
Crebrf	0.683792	2.068e-07
Il6r	0.683625	0.0009701
Lrp4	-0.683253	1.482e-08
Rhob	0.683136	4.223e-06
Pex26	0.682801	7.983e-10
Creb5	0.681489	0.002374
Cd47	0.681241	6.423e-06
Frzb	-0.680567	7.917e-05
Cox4i2	-0.679825	0.004066
Gale	-0.679396	4.581e-05
Penk	-0.679269	3.326e-05
Slco2b1	0.678873	0.002048
Polr1e	0.678102	0.0001249
Slc25a33	-0.678095	2.609e-05
Fam198a	-0.677056	0.0309147
Adam19	0.676782	2.323e-05
AABR07052529.1	-0.675861	0.008986
Atp1a3	-0.675449	0.001019
Rgs19	0.675425	0.003412
Fyb	0.675136	0.002667
Zfp488	-0.67508	0.001231
Arhgef2	-0.674404	2.769e-08
Dph5	0.674242	0.0009896
LOC684828	-0.67235	0.0385443
Parp12	0.671585	0.0007591
Tead4	0.671176	0.002141
Fam169a	-0.670854	1.282e-05
Tmem218	-0.67042	0.0002789
Egflam	-0.670415	0.0009267
Cpm	0.669933	0.008773
Chst2	-0.669832	0.0003957
Egfl7	0.669502	0.0001976
Igsf3	0.66939	0.0008653
Pou2f2	0.668519	0.003438
Rtkn2	-0.668009	0.009401
Rax	-0.667459	0.001753
Clstn1	-0.666928	0.0002273
LOC361646	-0.666693	0.0001006
Slc39a1	0.665984	1.015e-07
Aldoa	-0.664467	0.000264
Fignl1	-0.662909	0.0180771
Slc30a10	-0.662121	0.001122
Fam78a	0.662071	0.001044
Fcer1a	-0.661229	0.0221758
RGD1309651	-0.661124	0.003998
Svip	-0.661057	3.944e-05
Slc40a1_2	-0.659608	0.0391417
Apcdd1	0.659466	8.18e-08
Eno1	-0.658074	0.0003702
Nme3	-0.657318	0.000199
Lss	-0.656932	0.0009965
Dusp4	-0.656637	8.098e-06
Tnfaip3	-0.656635	0.000139
Mpp7	-0.656284	4.159e-06
Dab2	0.655538	0.00611
Pex10	-0.65524	5.465e-05
Ppp1r15a	0.655219	0.0002967
Akap12	0.655012	1.276e-05
Bhlhe41	-0.654863	0.0008111
Myo1f	0.654456	0.0246084
C1ql3	0.65328	0.001416
Gjc1	0.652833	0.0001606
Slc1a7	-0.652259	0.0005362
Oaf	0.652026	9.087e-06
Rgs9	-0.65163	0.002552
Vwf	0.651077	0.0008245
Plppr4	0.649244	0.0003052
AABR07069473.1	-0.648934	0.0438624
Hs3st3b1	-0.648718	4.304e-06
Dusp10	0.647927	0.0002081
Laptm5	0.647572	0.0149346
Snx18	0.647455	6.278e-05
Hr	-0.647066	0.0001735
Nyx	0.646741	0.00122
Rac2	0.646414	0.0184613
Man2a2	-0.646274	4.756e-06
Cytip	0.646121	0.0355693
Cd63	0.645256	0.0001243
Bhlhe40	0.645198	5.307e-08
Zeb2	0.644941	1.583e-05
Antxr2	0.64466	0.008079
Tmem120a	0.643802	5.29e-05
Ckmt1	-0.643293	6.374e-06
Gulp1	-0.643269	4.581e-05
Enkd1	-0.64276	0.000303
Kif20a	-0.642399	0.001559
Cd274	0.642013	0.0210328
Gpsm1	0.641908	3.029e-06
Qprt	-0.64145	0.013011
Acss2	0.641202	7.999e-06
Gpatch4	0.641096	0.001758
Egfl8	-0.641062	0.004377
Cenpi	-0.640987	0.0199216
Scd2	-0.639207	0.0006185
Itgb8	-0.638987	0.002332
Qtrt1	0.638684	0.00229
Usp2	-0.638068	1.26e-05
Dlg1	0.637543	8.62e-07
Grin2c	-0.637474	0.0162727
Ptp4a3	0.635948	0.001118
Raph1	0.635477	0.001231
Tbkbp1	0.635387	3.932e-06
MAST1	-0.633646	6.434e-05
LOC108348233	0.632749	0.0212615
Rdh8	0.63169	0.0139592
AABR07006310.1	0.631245	0.0226895
Hephl1	-0.630891	0.0215939
Igf2bp2	-0.630317	4.331e-06
Lgi4	-0.629798	0.0007591
P4htm	-0.629708	2.163e-05
Npm3	0.62929	0.006971
Tma16	0.62912	0.0001385
Egfl6	-0.628796	0.007532
Grk4	-0.628782	0.003632
Dll4	0.628382	0.0118749
Fpgs	0.628189	7.745e-05
Abcb9	-0.628019	0.001178
Nav1	0.627743	1.032e-05
Spidr	0.627736	0.00792
Rangrf	-0.627734	0.0001461
Pak3	0.627477	0.002041
Aars	0.627452	0.0002402
Bst2	0.627358	0.0173496
Bid	0.627354	0.009024
Stxbp1	-0.627232	0.003366
Pitpnm1	-0.62713	0.0001327
Ptch1	-0.626537	3.268e-07
Prr11	-0.626435	0.0460596
Fam212b	-0.626139	0.000102
Ddx21	0.62604	4.879e-06
Got1	-0.625972	0.0004164
Lamc1	0.625947	2.114e-05
Slfn2	0.62536	0.008677
Spred1	0.625206	0.0001537
Slc7a7	0.624521	0.0289832
Whrn	-0.624451	1.126e-05
AABR07052523.1	-0.624428	0.0110192
Rpgrip1	-0.6243	0.0424288
Cib2	-0.624095	0.0001595
Srgn	0.62405	0.00639
Hmgxb3	0.623735	2.315e-06
Klc3	-0.623465	0.0001067
Nr6a1	0.623365	0.0233006
Inpp5d	0.62323	0.007775
Acbd6	0.622955	1.409e-05
AC141169.2	-0.622922	0.002495
Tbc1d32	-0.622741	0.0111872
Plxdc1	-0.622636	0.008028
Kifc1	-0.62258	0.0228872
Slc2a10	-0.622304	0.0497065
Arg2	-0.622265	0.001102
Mapre3	-0.621902	0.0001057
Map10	-0.621787	0.002133
Slc41a2	0.621509	0.0004916
Zfp280b	0.621448	0.002024
Ftsj3	0.620708	1.136e-06
Kntc1	-0.620097	0.021367
Tmem27	-0.620043	0.004763
Chst11	0.619881	0.001037
Apobr	0.619787	0.0457335
Diaph3	-0.618785	0.002338
Slc25a10	-0.617649	1.792e-06
Pim1	0.61721	0.0215492
Vsir	0.617146	0.012241
Wdr17	-0.617006	0.0174219
Slc16a8	-0.616248	0.0212523
Chd1l	-0.614935	0.001164
RGD1564698	0.614838	0.0399922
Ankrd44	-0.614539	5.434e-06
Pcdhgb4	0.613729	0.003656
Flot1	0.613162	2.315e-06
Il18bp	0.611542	0.0133658
Bmf	-0.61145	0.001457
Map3k14	0.611278	5.683e-05
Aprt	0.611046	0.0002234
Pcdha4_2	0.610529	0.00853
Kcnh5	0.610373	0.0008764
Slc35g3	0.610339	0.039173
Kif17	-0.610247	0.0487185
Atp1b2	-0.610125	0.001972
AABR07005535.1	-0.609267	0.0277631
RGD1565616	-0.609239	0.0001733
Paqr9	0.609225	9.96e-05
Nfyb	-0.608495	8.021e-06
Clec11a	-0.608459	0.043608
Cep89	-0.608221	2.705e-06
Mdm1	-0.607923	0.007728
Pstpip2	-0.607883	0.0447975
Acaca	-0.607417	9.729e-05
Gadd45a	0.607168	6.466e-05
Crispld2	0.607129	0.003472
Haus3	-0.606801	0.0001734
Map4k1	0.606241	0.0295318
Dpysl3	-0.605939	3.47e-05
Yars	0.60528	2.788e-05
Zfp365	-0.604913	0.0002095
LOC687399	-0.604749	0.011212
AC117889.1	0.604445	0.0286306
Panx1	0.60367	0.00611
Eprs	0.602519	3.406e-07
Pik3r1	0.602001	0.001501
Ppp1r18	0.601978	4.079e-06
Pou3f1	-0.601557	0.0458711
Iqcd	-0.601214	0.0433743
Shisa4	-0.600161	0.0005264
Tal1	0.599252	0.0322411
Ltbr	0.599232	0.0001738
Pde9a	0.599121	0.002176
Camta1	0.598662	2.184e-05
Galnt7	-0.598369	0.001818
Tmem200c	0.597587	0.001233
Dhh	0.597521	0.0181943
Igsf1	-0.597193	0.0115468
Lrrtm4	0.597008	0.009428
Ttr	-0.596695	0.0281017
Ccdc86	0.596644	0.0001756
Grik1	0.596526	0.000442
LOC100911581	-0.596476	4.42e-06
Tnxb	0.596446	0.0290275
Tex15	0.596301	0.0293752
Tmem8a	0.59566	1.063e-06
Arhgap29	0.595391	9.289e-06
Col15a1	0.594839	0.0396491
Cdk5r2	-0.594471	0.004056
Ubap1l	0.59417	0.0008233
LOC680200	0.593312	0.006519
Acsl6	-0.592816	0.005199
Samd8	-0.590822	2.815e-05
Arl6	-0.590532	0.004802
Emp3	0.590403	0.0107175
Swap70	0.590261	8.929e-05
Sostdc1	-0.590124	0.0134464
Lars	0.590012	1.348e-06
Mmel1	-0.589912	0.0498516
Zfp78	-0.589844	0.0282078
Ifitm2	0.589604	0.001515
Scube1	0.588939	0.0124118
Sv2b	-0.588808	0.0103949
Slc3a2	0.588794	0.0001388
Lamp5	0.588659	0.00128
Adrb1	-0.588039	0.0473041
Lap3	0.587896	4.615e-06
Rasl11b	0.586976	0.0169016
Lrrc57	-0.586964	1.85e-05
Acat2	-0.58694	0.001361
Nudt6	0.586489	0.002927
C1qb	0.586403	0.009411
Rhot2	-0.586182	0.0002383
Pim3	0.586148	8.21e-05
Zyx	0.586118	4.423e-05
Taf5	0.585803	0.0006301
Wdr47	-0.585792	0.0001333
Tln2	-0.585197	0.0001252
Plekha4	0.584391	0.0005969
Rai14	0.581911	5.492e-05
Zfp295	0.581724	2.501e-06
Haus4	-0.581559	0.002136
Fam160a1	-0.581468	0.0005994
Aatf	0.581145	6.901e-05
Gbp5	0.581133	0.0395857
Caskin2	-0.581019	8.013e-07
Dlg4	-0.580996	0.002434
Hdac9	-0.580598	0.005987
Gar1	0.580547	0.0004562
Arrdc4	0.580365	0.0399879
Aacs	-0.580118	1.863e-05
Erg	0.580091	0.00937
Rassf1	0.579962	9.146e-06
Crb2	-0.579877	0.006627
Vash1	0.579316	0.0001067
Pde6a	-0.579206	0.0101207
Ednrb	0.579085	0.001668
Bend3	0.57835	0.005322
Ndufa4	-0.577763	0.0001367
Pqlc1	-0.577593	0.0001057
Pprc1	0.576571	1.573e-05
RT1-N3	0.575444	0.0352897
Bora	-0.574441	0.0147724
Rpap1	-0.574081	0.0005301
Gramd1b	-0.57404	1.638e-05
Pcdh15	0.573269	0.0479533
Rasal2	0.572702	1.963e-06
Clic1	0.572618	0.006742
Ckb	-0.572332	0.008028
Hydin	0.571559	0.008706
Adora2b	0.571538	0.003379
Kcnn1	-0.570993	0.00394
Lrrc75b	-0.570957	0.0001323
NEWGENE_1306399	-0.569903	0.0006223
Radil	-0.569722	0.003689
Mrgprf	-0.569521	0.0468541
Adipor1	-0.56855	0.004027
Tmco3	-0.56831	0.001801
Lin7a	0.568272	0.004292
Rasip1	0.568205	0.0006978
Tnfaip8l2	0.568132	0.0434857
Acss3	0.56813	0.001327
Ndrg2	-0.568094	0.003641
Gapdh-ps2	-0.567408	0.002939
Agbl5	-0.565835	4.837e-05
RGD1560010	-0.565039	0.005933
Ccdc107	-0.56502	0.0003064
Spa17	-0.56422	0.0139874
Mpp3	0.563742	0.004041
Pfkfb3	0.563341	1.667e-05
Ano6	0.563034	0.000155
Abca8a	-0.562995	0.01541
Phyhd1	-0.562889	4.167e-05
Eml2	0.561691	7.744e-05
Plekhh3	-0.561486	2.205e-07
B3galt5	-0.560836	0.003726
AABR07012054.1	0.560792	0.002044
Sik2	-0.560541	4.053e-06
Gpsm2	0.560318	0.004091
LOC500956	0.560294	0.0008102
Egf	-0.558518	0.019089
Hectd2	0.558448	0.0001938
Nfkbia	0.558199	0.0007877
Tcn2	-0.55808	7.575e-05
Ctsl	0.55799	0.0130667
Frmd3	0.557728	0.004235
Gpr160	-0.557516	0.0394805
Ifi30	0.557348	0.0003644
Arhgap42	0.557271	0.005391
RGD1306271	-0.556908	0.0007713
Cep164	-0.556744	1.791e-05
Ptpre	0.55598	0.0181149
Frmd8	0.555643	4.232e-05
Pak1ip1	0.555341	0.0003939
Iars	0.555051	0.0001593
AABR07028488.1	-0.555023	0.0197855
LOC108348771	0.554304	0.0151307
Map4k4	0.553436	5.331e-05
Pnma2	0.553313	0.004459
Btbd11	0.553144	0.001969
Elfn1	0.55294	0.005391
Rnd3	0.552169	9.966e-05
Pacsin2	-0.551758	7.626e-06
Fam222a	0.551701	0.0005941
Csgalnact1	0.551298	0.0199983
Arhgef26	-0.550892	0.001187
Dusp1	0.55062	0.0378296
LOC100912181	-0.550605	0.0069
Cby1	-0.55034	0.004002
Ccdc163	-0.550157	0.008561
Trim59	-0.550138	0.004394
Fbxw7	0.55002	7.917e-05
Clic4	0.549441	0.0001064
Crym	0.549045	0.0412358
Ssbp4	0.548683	0.0002599
Bbs7	-0.548643	0.002146
Mmrn2	0.548191	0.0104726
LOC108348080	0.547838	0.003317
Spry4	0.547832	0.0002878
Pgam1	-0.547592	0.004531
Eri1	0.54753	9.696e-07
Pus7l	0.547315	0.0465387
LOC108348128	0.546818	0.0401747
Mfap2	-0.546348	0.0443024
Prmt3	0.545805	0.0003985
ENSRNOG00000051719	0.545759	0.001509
Cetn2	-0.545486	0.0002008
Lrat	-0.545293	0.0262084
Wasf3	-0.545258	0.003998
Abhd18	-0.544694	0.005325
Pole	-0.544369	0.0363185
Ldlr	-0.544195	0.0499499
Pask	-0.543452	0.008529
E2f5	0.543439	0.004789
Rsu1	0.543214	0.004918
Arhgef39	-0.543054	0.0004821
Grin2d	-0.542464	0.0173633
Pwwp2b	-0.54241	0.0002716
Mrpl14	-0.541985	0.001268
Zbtb5	-0.540632	0.0001069
Cabp5	0.540549	0.0257931
Pcbp4	-0.540097	0.0136995
Gpr19	0.540057	0.004117
Atg16l2	0.540023	0.005645
Tcp11l1	0.538988	0.001931
Rab30	0.538667	0.001803
Rtn2	-0.538602	0.001652
Nckap1l	0.538266	0.0370275
Capn6	-0.538237	0.0238981
Rhot1	-0.538186	0.0002655
Ptprn	0.5377	0.0407595
B4galt6	0.537533	6.364e-05
Fhod3	-0.536896	0.0003734
Lztfl1	-0.536888	0.0004212
Slc38a2	0.536874	0.0013
Slc26a7	-0.536729	0.0002434
Ccdc65	-0.536511	0.007292
Zbtb2	0.536246	0.0005737
Efna1	0.536181	0.0157555
Cpne8	0.536046	0.001186
Ap2a2	-0.535612	1.287e-05
Eml1	-0.535313	0.0006053
Naaa	-0.535184	0.005134
Sp110	0.534687	0.009292
Pgbd5	0.534621	0.0002716
Lyrm1	0.53413	0.002871
Cfp	0.53376	0.0290953
Pkig	0.532286	0.0004038
Lingo3	-0.532134	0.0332285
Ears2	0.531975	0.0162783
Adam11	-0.531693	0.001786
Heatr1	0.530092	0.0004643
Prrg1	0.529623	0.0124529
Golga4	0.529382	0.0001949
Ptpru	-0.529162	0.003921
Nhs	0.527991	0.003379
Cyp46a1	-0.527768	0.006334
Zfyve21	-0.527749	0.002344
Slc12a6	0.527575	0.003266
Map2k4	0.527464	0.0004165
Stat2	0.527034	0.0001738
Abca1	0.526958	0.0459659
Raver2	-0.526123	0.0189903
Fgf11	-0.525785	0.002844
Grtp1_2	-0.525446	0.002024
Klhl18	-0.525016	0.0328419
Rela	0.525001	0.0001072
Raly	-0.524763	0.002761
Pdp2	-0.524466	0.0008333
Cd200	0.524362	0.0001979
Plpp5	0.524064	0.0187302
Ncf1	0.52386	0.0495734
Tyms	-0.52369	0.0007231
Hddc3	-0.523665	0.0007277
Fip1l1	0.523197	1.57e-05
Fyco1	-0.522976	0.001142
Wdr46	0.522964	0.0005711
Tob2	-0.522195	0.007252
Dcxr	-0.52201	0.0253133
Aif1l	-0.521562	0.0148828
Kcnk3	0.521456	0.00224
Ccs	-0.521253	0.002186
Mpdz	-0.520604	0.003859
Riox2	0.519676	0.0233051
Zbtb1	0.519086	0.0009024
Kctd7	-0.518724	0.0209879
Cdon	-0.518403	0.001571
Ttyh2	-0.517996	0.0004209
Abcg1	-0.517952	0.0001289
Mapk4	-0.517347	0.0144784
Nt5e	-0.517256	0.002461
Npm1	0.517246	0.0001367
Madd	-0.516818	0.001328
Phlda1	0.516364	0.0281881
Mmp15	-0.516115	0.0325055
Glcci1	0.515389	0.002018
Hpcal1	-0.515121	8.86e-05
Cep104	0.514998	2.537e-05
Srsf6	-0.514735	0.000277
Zfp707l1	-0.514631	0.003287
Ide	0.514559	0.0001489
Cnot11	0.514161	3.097e-05
Slco1c1	-0.513627	0.001548
Sdad1	0.513595	0.00432
Abhd14a	-0.512875	0.0298251
Trafd1	-0.511433	3.666e-05
Ptpn6	0.510737	0.0282312
Nmral1	-0.510612	0.004364
AABR07058976.1	0.509983	0.0483348
Me2	-0.509346	9.78e-05
Ift27	-0.50927	0.003692
Cyb561a3	-0.509165	0.002841
Cep128	0.509163	0.004022
B3galnt1	0.508952	0.001857
Klf15	-0.508946	0.008945
LOC108349594	-0.508884	0.0005747
Scg5	-0.508882	0.007305
Ano3	0.50881	0.0122343
Leng1	-0.5086	0.0007591
Prag1	0.508581	0.014238
Gars	0.507946	0.0003662
Slc7a1	0.506861	0.000934
Endog	-0.506594	0.0158771
Mertk	0.506564	0.0007989
Ednra	0.506328	0.0137164
Zc3h12c	0.5063	0.0001371
LOC103689983	-0.505972	0.004055
Krt18	0.505777	0.00416
Utp20	0.505682	0.0001136
Smad3	0.505645	7.335e-05
Narf	-0.505545	3.938e-05
Sgpl1	0.505264	1.377e-05
R3hdm4	-0.505245	9.729e-05
RGD1564664	0.505091	0.0149312
Atp6v0e2	-0.504766	0.00903
RGD1566368	-0.504735	0.0136173
Samd10	-0.504612	0.001237
Igf1r	0.503407	0.0001165
Trim21	0.503273	0.0104726
Gnaz	-0.502293	0.001902
Nlk	-0.502107	0.001353
Pip4k2c	-0.50197	8.022e-06
Bnip3	-0.501952	0.006627
Tmem63b	-0.501345	0.0001022
Mvd	-0.501245	0.0006174
Giot1	-0.50121	0.0111187
Pls1	-0.500694	0.0491954
Nab2	0.499322	0.002632
Cars	0.498887	0.0009355
Aldoc	-0.498741	0.0495091
Rabep2	-0.497766	0.0261017
Sox10	0.497354	0.0360763
Parp4	-0.497225	0.0251609
Pcdhga8	0.497163	0.0390944
Znrf1	0.496001	0.008043
Spon2_1	-0.495799	0.0409986
Desi1	-0.495673	0.0002613
Ldha	-0.494863	0.018411
Fam19a5	0.494771	0.006426
Cebpg	0.49466	9.8e-05
Sept4	-0.494418	0.006227
Pus7	0.494259	0.007123
Dmpk	-0.494192	0.0187211
Klf6	0.494162	0.0417175
Marc2	-0.493659	0.008534
Klf7_1	0.493584	0.001775
Nat14	-0.493492	0.0128937
Fzd2	-0.493195	0.0127668
Psd	-0.493124	0.042561
Cep126	-0.493051	0.005675
Mxd4	-0.493002	8.919e-05
Rims2	-0.492804	0.0235589
Ankrd12	0.492749	0.007366
Celsr2	-0.492481	0.0004223
Gapdh	-0.492476	0.0102636
Lig4	-0.492318	0.0259833
Fkbp14	-0.492302	0.003641
Mob1a	-0.491889	0.00307
Trove2	-0.491251	0.0278556
Rn50_13_0829.4	0.491022	0.004873
Ddit4	-0.490909	0.0002577
Kdm4c	-0.490574	0.0316355
Gnat2	-0.490475	0.0117296
[truncated: 709 more rows]
