# Supplementary material for: Comprehensive transcriptomic analysis reveals canonical and novel pathways modulated by nanoceria in mammalian retinal degeneration
Source: Research Square preprint supplement (doi:10.21203/rs.3.rs-7456023/v1), 2025-10-25
Supplement: Supplementary file 5 [file b4af8cfed5d2f4da7096e1ad.xlsx]

## Sheet: Table_S2_NANOLD_vs_LD_DEGs
Gene	log2FC	FDR
Gdf1	-9.26009	0.0001344
NEWGENE_1304700	-9.15186	0.001028
Krtap1-5	-8.27297	0.001092
LOC102556337	-7.97935	0.001015
Krtap15-1	-7.29881	0.0003588
Serpinb12	-6.96518	0.0158535
Awat2	-6.6667	0.0114527
LOC102549714	6.65896	3.162e-16
RGD1560883_2	-6.59359	0.01096
ENSRNOG00000049870	6.52346	0.002395
LOC100365588	-6.47308	0.005783
LOC100363136	-6.46429	0.0167309
Krtap14	-6.27034	0.003873
LOC680160_1	-5.77889	0.0380826
LOC102547059	-5.50441	0.007228
Krt86	-5.42825	0.0006441
Acnat1	5.42548	0.011257
Krtap3-1	-5.37672	0.002026
Orm1	5.12468	0.0224037
Krt83	-4.84975	0.0001705
Krtap2-4	-4.82582	0.0110237
Krtap3-3	-4.75956	0.008628
AABR07034730.3	4.51791	0.0301969
LOC100360575_1	4.48189	0.0369829
Krt81	-4.47613	0.00413
LOC100910814	-4.35577	0.0462252
Krtdap	-4.33726	0.0158442
Krt85	-4.33686	0.0001126
AABR07034730.2	4.28457	0.0133276
Rn50_15_0408.6	4.28015	5.865e-05
Krt77	-4.25504	0.0366367
Krtap8-1	-4.19606	0.0268697
RGD1561684	-4.1643	0.0006519
Krtap7-1	-4.15609	0.0145257
Dsg4	-4.15473	0.008637
Impad1_1	-4.08285	0.007005
Krtap16-5	-4.05154	0.0006067
Acod1	3.84853	0.0324467
Kb23	-3.824	0.0005063
Krtap11-1	-3.81771	0.00136
AABR07065782.1	-3.72777	0.028402
Krtap13-1	-3.67539	0.003873
AABR07065815.1	-3.61938	0.0217734
Ibsp	3.56551	0.0002158
Klk7	-3.47587	0.0169718
Clec4e	3.43193	5.848e-06
Lilrb3	3.43078	0.0006139
Krt72	-3.23544	0.007194
Olr1588	3.2153	0.00807
RGD1562652	3.14777	0.006779
AABR07051562.1	3.08163	0.0359249
Krt35	-3.0475	0.002714
Lalba	-2.97594	0.005709
Mt4	-2.93845	0.0111937
Usp9y	-2.86167	0.0287382
Krt73	-2.82417	7.12e-05
Ms4a4c	2.77981	6.964e-05
AABR07035506.1	2.75914	0.0397225
RGD1564937	2.75707	0.0323229
AABR07060872.1	2.73929	1.626e-05
Siglech	2.72318	0.0001795
Chi3l1	2.6942	8.475e-36
Nxpe5	2.62967	0.0002066
Arl9	2.62507	0.0115314
Krt82	-2.60558	0.0309455
Psors1c2	-2.55791	0.0480597
Jchain	2.50602	5.441e-05
Acsm4	-2.49837	0.0296835
Klra5_4	2.49047	0.002027
Actg2	-2.48627	1.8e-07
Stk31	2.48435	0.0186951
C3	2.48005	0.0001311
Krt34	-2.43333	0.00104
Il17rb	2.42733	4.551e-23
Cxcl11	2.42024	5.574e-23
LOC497796	2.3693	0.004875
Fcrl3	2.35379	0.0186518
Micb	2.33042	0.0164901
Fam71a	2.32148	9.452e-09
Fcnb	2.3002	6.894e-11
AABR07013111.1	2.29927	0.0197484
RGD1560281	2.29406	0.0186518
Kng1	2.2937	0.00316
Scn10a	2.29011	0.0196958
Lilrb4	2.28907	2.035e-06
LOC100361706_1	2.28376	0.0324341
Ttc24	-2.25686	1.665e-10
LOC100911101	2.21248	0.0046
LOC100909671	2.18942	0.003921
Aqp2	2.18594	0.038424
LOC24906	2.16771	9.272e-08
Tpo	2.13565	0.007381
Mrgprg	2.11662	0.00135
Tectb	2.1149	9.96e-11
AABR07018226.2	2.09014	4.48e-05
ENSRNOG00000034190	2.07106	0.002562
Krt27	-2.06959	0.041375
Csf3r	2.06436	4.515e-06
Mmp8	2.05334	0.0160696
AABR07012274.1	-2.04559	0.0272723
AABR07047576.1	2.02217	0.0262482
Skor1	2.02139	0.0116158
Gcsam	2.00255	0.0003962
LOC681341	1.98807	5.865e-08
Ceacam4	1.97557	0.003048
F10	1.97043	6.589e-06
Rptn	-1.96046	0.0009129
Krt28	-1.9581	0.006827
Fcgr3a	1.95729	6.963e-06
RGD1561143	1.95623	0.000111
Cd3d	1.9538	0.0291819
Rn60_10_0908.5	-1.95126	0.0172858
Mpa2l	1.95097	4.691e-06
AABR07072028.1	1.94949	0.00786
Krt25	-1.92234	0.000194
Clec4d	1.9148	8.657e-13
Lilrc2	1.90476	0.0006644
Gpr31	1.90421	0.0384738
AABR07015917.1	1.89978	7.246e-10
Hk3	1.8919	2.932e-05
AC132752.1	1.88807	0.0160083
LOC100361009	1.87608	0.0215887
Cd3e	1.87038	0.0232994
Nlrp1a	1.85293	0.0003631
AABR07070581.1	1.84758	1.028e-11
Mettl7b	-1.84637	0.0233657
Mcemp1	1.83152	0.0002831
Clca5	-1.81869	0.0448072
LOC685157	1.77372	0.001785
Cd22	1.77002	0.0196471
Cxcl13	1.76939	9.755e-07
Pdcd1	1.76674	1.549e-05
Glp1r	1.76516	4.628e-06
AABR07001061.1	-1.76506	0.0331406
AABR07030791.1	1.74487	0.0133156
Ccl4	1.74286	1.528e-23
LOC680910	1.73147	5.826e-05
Lce1m	-1.73128	0.0378117
Ccr2	1.71817	0.002742
Prok2	1.70056	0.0143085
AABR07017902.1	1.69467	0.0302347
AC129395.2	1.68626	0.0242493
Gfap	1.68138	4.941e-10
LOC100911215	1.67568	0.0482171
AC128960.2	1.6748	4.974e-06
Nanos2	1.66724	0.0215887
AABR07048322.1	-1.65555	0.0412009
Hhla1	1.64497	0.0224866
Myo1g	1.62352	1.026e-06
Klra1	1.62063	0.0481935
Itgal	1.61858	7.914e-05
LOC100362110	1.60493	0.00265
C6	1.60444	0.008593
Spn	1.57374	0.003386
Adad1	-1.56749	0.0239791
Cd300a	1.55562	0.0008153
RGD1559724	1.54506	0.0483086
Reg3a	-1.53692	0.004151
Ccl12	1.53653	1.186e-13
Uox	1.53512	0.03998
AABR07017635.2	-1.53231	1.553e-05
Evi2b	1.52589	0.0259446
Il6	1.52393	4.511e-17
Slc14a2_2	1.52325	0.0110569
Il17c	-1.51926	0.02138
Il18rap	1.5021	0.0001011
Cd33	1.49845	0.008928
AABR07065124.1	1.49554	2.585e-17
AABR07015015.1	-1.4947	0.024357
Vsig4	1.49264	0.0378102
AABR07001780.1	1.48125	0.002107
Icam4	-1.48081	0.0472472
LOC499229	1.47938	0.0163889
Il21r	1.47688	0.0001574
RGD1561778	1.46837	9.461e-09
Icos	1.46607	0.0165981
Vegp2	-1.46276	0.0175674
LOC500148	1.4587	1.448e-09
Lcn2	1.45035	8.879e-11
Ccl3	1.44396	1.266e-49
AABR07005569.1	1.44264	0.009679
Clec12a	1.43773	0.0241394
Fpr2	1.43538	0.03613
Ccr5	1.43397	1.111e-06
Klkb1	-1.42556	0.008005
Clec9a	1.42172	0.0001617
Pate4	1.41647	5.949e-07
Pcdhb6	1.41555	0.0418582
Sash3	1.4079	0.0001771
Gpr33	1.40709	0.025085
AABR07044551.1	1.40707	6.169e-11
Pld4	1.40466	0.0133156
Il20	-1.397	0.0460238
Cxcr3	1.38706	0.0341656
LOC681325	1.38151	1.525e-07
Parvg	1.37513	0.0008519
Egr4	-1.3749	0.0163419
Rnase2	1.36704	0.0164225
Fcgr2b	1.3663	1.322e-19
Cp	1.36357	1.245e-30
Tmem52b	1.36289	0.003494
Edn2	1.35657	5.283e-27
Ptprc	1.35228	1.573e-06
Bin2	1.35158	0.019589
Stab2	-1.34599	7.14e-08
Lilrb3a	1.34432	0.004872
Ms4a4a	1.34294	5.393e-07
Igsf6	1.31843	0.0005462
Calcb	-1.31535	0.003616
Itgad	1.31351	2.752e-11
Lilrb3l	1.30987	0.003637
LOC100360821	1.30692	4.965e-05
Cd6	1.30385	0.0382539
LOC100910526	-1.30241	0.0361619
Gal	-1.2964	0.006829
Cst7	1.2901	4.18e-05
Plek	1.2875	9.851e-11
Ccl2	1.28733	9.737e-69
RGD1564347	1.2855	0.0479167
Cd8b	1.2854	0.008079
Olr1106	-1.28492	0.0006393
Nckap1l	1.28391	0.003641
Pipox	1.281	0.001252
Atf3	-1.27843	8.224e-36
Kmo	1.27539	0.007381
AABR07024757.1	1.27212	0.0329485
Nfam1	1.26169	0.004418
Cd53	1.25977	0.0001632
Sell	1.25813	0.0007604
Rnase11	1.25725	0.001979
Egr3	-1.25482	0.0236587
RGD1307182	1.25251	0.0001946
Gpr65	1.25212	0.0004338
Itgb2	1.2512	3.613e-09
Ccl7	1.25017	2.172e-40
Fyb	1.24977	1.1e-05
LOC500712	1.23726	1.468e-10
AABR07005837.2	1.23676	0.0457851
Ikzf1	1.23598	0.002183
Tlr7	1.23078	0.0001408
C1qa	1.23045	0.0005063
Lyc2	1.22909	0.006635
Spon2_2	1.22617	0.0235759
Laptm5	1.22615	0.001596
Ms4a6c	1.22572	0.0004253
Gpr183	1.22536	0.002258
Dnai2	1.22388	1.721e-10
Ms4a6e	1.22163	0.0005858
LOC103691893	1.22125	0.0002698
Samhd1	-1.21475	0.0157086
Agtr2	1.21416	0.0363622
Wdfy4	1.21409	0.0004765
Krt31	-1.21296	0.0414024
RT1-CE16_1	1.2055	0.0007745
LOC497963	-1.20472	0.00272
Cybb	1.20456	0.0002283
Slc22a3	-1.20137	0.004823
Clec7a	1.2013	0.0008519
Mrpl53	-1.1935	0.0114224
Was	1.19156	0.0325566
Myo1f	1.18893	0.0102442
Nilr1	1.18818	0.004737
Serpina1	1.18742	0.002578
Clec5a	1.18615	3.685e-08
RT1-DMb_1	1.18141	0.002026
AABR07049799.1	1.17606	0.0345408
Tlr13	1.1713	0.001285
Fcer1g	1.16916	4.446e-06
Gpr171	1.16663	0.001219
Lcp2	1.16499	1.996e-05
Tnfsf13b	1.1638	5.221e-05
Hcls1	1.15967	4.974e-06
Tlr10	1.15849	0.005952
Cd8a	1.15774	0.004823
Tbxas1	1.15585	0.0005842
AC103292.1	1.14974	5.817e-05
C4a_2	1.14877	9.822e-11
Dock2	1.14737	0.007949
Noxo1	-1.13691	0.030405
C1qb	1.13512	1.567e-08
Tnfaip8l2	1.13274	0.0181078
Lat2	1.13152	0.007035
Sox30	1.13063	0.0248872
Tagap	1.12971	0.0407258
Ms4a6a	1.12824	9.51e-19
Csf2rb	1.12524	4.871e-20
Scgb3a1	1.12288	1.22e-05
C3ar1	1.12135	0.002799
Lyz2	1.11728	0.0354536
H1foo	1.11674	4.694e-10
LOC691141	1.11566	0.0001549
Aif1	1.11131	0.0345408
Adgre4	1.10974	0.0291801
LOC308990	1.10503	0.0009682
Slc2a5	1.0981	0.0001676
Arhgap45	1.09674	0.0116231
Vom2r60	1.09668	0.0202511
Clec4a3	1.09592	0.0434405
Pstpip1	1.09531	0.0002187
Lst1	1.09406	0.009544
Adgre1	1.08769	0.002429
Mnda	1.08736	7.352e-10
Rtdr1	1.08655	0.002267
Fcgr1a	1.08535	0.0001172
Slamf1	1.08463	0.041712
Duox2	-1.08415	0.0003569
Mmp10	-1.08375	0.001342
Gpr84	1.08049	1.313e-12
Cd200r1	1.08026	5.746e-05
LOC100910669	1.07929	0.007351
Slamf8	1.07928	1.6e-06
Ms4a8	-1.07762	0.0007667
Itk	1.07665	2.399e-20
Ncf1	1.07537	0.00252
Cyp11b2	-1.07244	1.012e-05
Bcl2a1	1.07048	0.00375
Lrrc31	1.06923	0.0341633
Rgs14	1.069	0.0254821
Cyth4	1.06844	2.329e-05
Phb-ps1	1.06719	0.0451697
Olr1	1.06573	3.789e-15
LOC102552659	-1.06357	0.0381903
Serping1	1.05931	1.863e-12
Trem3	1.05874	0.035925
Slc11a1	1.05494	0.0112626
Nlrp3	1.05458	7.153e-05
LOC102552324	1.05177	0.0302953
Tlr8	1.04704	0.0469335
RGD1305184	1.04687	0.005518
RGD1309362	1.04662	0.001501
AABR07068221.1	1.04589	0.0397225
Mefv	1.04498	0.044095
Napsa	1.04414	0.000121
Lyl1	1.04308	0.0407258
Rn60_10_0648.2	-1.04259	0.004194
Clec2d2	1.04147	0.0115937
Cd300e	1.04116	0.004927
Serpine3	1.04105	0.005026
Rasal3	1.03766	0.0009764
Hhatl	-1.0369	1.485e-08
Cx3cr1	1.0364	0.0451594
C1qc	1.03565	3.224e-05
Vav1	1.03489	4.45e-05
Il1b	1.03345	3.678e-07
LOC100363193	1.03287	2.318e-05
Abcg3l3	1.02883	0.001455
Tnfrsf26	1.02591	1.814e-07
Map3k15	1.02426	0.0413547
Tyrobp	1.02143	1.027e-06
Hck	1.01821	4.078e-07
C1s	1.01619	1.678e-09
Cd80	1.01433	0.0002172
Klhl6	1.01074	0.0434674
Gdf15	-1.00935	2.819e-27
Rec8	1.0084	0.00903
Pik3cg	1.00546	0.0007606
Spi1	1.00505	5.679e-05
Ngp	1.00247	0.0160083
Atp8b4	1.00164	0.0004654
Pik3r5	1.00109	4.752e-05
P2ry6	0.996866	8.147e-05
Lat	0.995167	0.0236182
Camp	0.986286	0.0006175
Btk	0.983592	0.0126975
Col6a5	0.98059	6.346e-05
Patl2	0.978962	0.034382
C5ar1	0.978801	1.583e-05
F2rl2	0.976696	0.0475205
Pla2g3	-0.975862	0.001936
Il2rg	0.974568	4.972e-05
Cox7a1	-0.973669	0.001793
Fgf2	0.969906	1.953e-41
Nek10	0.965437	0.0002294
AABR07006310.1	0.962817	0.0149048
Itga4	0.960893	0.0362151
Htra4	0.960891	0.001658
Aqp6	-0.960818	9.755e-07
AABR07063901.2	0.960119	5.283e-27
AABR07060628.1	0.959609	0.0454576
Igh-6	0.956522	0.003418
Atp7b	0.956341	3.91e-06
AC128836.1	-0.955858	0.0454002
Slc25a31	0.952812	0.0128433
Dennd1c	0.95079	0.030232
AABR07062775.1	0.948422	0.00832
Fermt3	0.946888	6.17e-09
Naip6	0.946217	0.0213573
Calca	0.940373	7.646e-11
AC125248.1	0.935567	1.715e-06
Arhgap9	0.934604	0.004612
Coro1a	0.934351	0.00341
LOC100910138	0.934323	0.0215887
Rpe65	-0.933179	1.624e-05
Lrrc25	0.929858	1.573e-06
ENSRNOG00000047915	-0.923513	0.0363622
Tnfrsf4	0.923311	0.003519
Mt1m	0.92305	0.0008153
Osm	0.919637	1.24e-09
Gpr132	0.914014	0.0324341
A2m	0.913104	9.118e-16
Slc13a5	0.91168	1.67e-36
Itgax	0.911215	1.022e-11
Dnajb7	0.908569	0.0001346
Arhgap30	0.908008	0.0109022
AC121415.1	0.904854	0.003324
Tas2r137	0.901743	0.0218198
Cdk1	-0.900811	0.0422242
NEWGENE_1308171	0.900243	0.012121
Msr1	0.899668	3.736e-07
Apoa5	0.899601	0.0159837
Rn50_11_0160.1	0.899548	0.0146518
Nlrc4	0.896495	0.0485625
Spib	0.896453	0.008847
Mthfd2	-0.895856	0.0004424
Cxcl10	0.895323	2.707e-34
AABR07002623.1	0.893742	0.031122
AABR07047771.1	0.891153	0.0468732
RGD1565693	-0.891088	0.0481486
Socs3	0.889771	2.852e-99
Hr	-0.88931	5.719e-05
Fbxo39	0.886154	0.002404
Wnt5b	-0.885849	0.0296755
P2rx7	0.885105	0.0368972
Spp1	0.882528	3.604e-42
Inpp5d	0.882187	0.0005471
Cfb_1	0.880628	1.15e-16
Clca4	-0.880386	0.002327
RGD1565355	0.874267	0.0001346
P4ha3	0.871813	0.006816
Nusap1	-0.870402	0.023828
AC127640.1	0.869326	0.0353781
Sctr	-0.867236	1.051e-05
ENSRNOG00000059237	0.866624	3.996e-10
Cebpe	0.866526	0.010417
Abi3	0.862109	0.0249867
Dio1	-0.857139	1.892e-05
AABR07034239.1	0.855846	1.999e-10
Npas4	-0.854607	2.136e-17
AABR07058838.1	0.853881	0.0146518
Ednrb	0.851959	0.009467
Fosb	-0.84812	0.0002097
Tcf24	0.845844	0.006213
Cfp	0.844204	0.0401974
Csf2ra	0.843587	0.0112725
Tas1r3	0.842759	0.0107099
Jak3	0.84113	4.063e-57
Tmem106a	0.838319	1.069e-06
Zc3h12d	0.836864	0.0002116
Stab1	0.835469	0.0002712
Lrrc15	0.835415	1.618e-31
Pcdhgb6	0.834097	5.186e-07
Ncf2	0.825739	1.534e-05
RT1-Da	0.824421	0.0458724
Dnah9	0.822347	0.005066
AABR07049134.3	-0.822335	0.008977
Apbb1ip	0.821116	0.0003689
Rn60_8_0242.1	0.820212	0.0001122
Rhoh	0.815586	0.0328449
Ccdc73	0.814174	0.008825
Steap4	0.813344	1.203e-21
Rhd	0.81322	0.0147163
RT1-Bb	0.812601	0.0338308
Fgr	0.812401	4.313e-07
Hspb9	0.806861	0.003418
Cd244	0.806328	0.001464
Lcp1	0.80415	0.0008731
Sh3tc1	0.803897	0.0201478
Lpo	-0.803251	0.00198
Stk33	-0.801178	0.019138
Gal3st1	-0.800714	0.0165981
Mgat4e	0.798878	2.058e-13
AC109891.1	0.798498	0.0001691
Map4k1	0.798255	0.040464
Gstt4	0.797567	0.001097
Ptgir	0.797345	8.225e-05
Syce3	-0.794684	2.847e-06
Slc37a2	0.792947	0.0188604
AABR07054286.1	0.78853	0.0103644
Akr1c14	0.787985	0.004935
Ceacam16	-0.787033	0.002617
LOC499643	0.786784	0.0346651
AC125873.1	0.785891	0.005598
Fgl1	-0.782988	0.0278331
Penk	-0.777114	6.007e-07
Cxcl9	0.775734	0.002224
Lca5l	0.775418	0.0196799
Gk2	-0.772835	0.0259643
Smc1b	0.771425	0.0257968
Rtp3	0.77004	0.0303686
Gphb5	-0.767222	0.005755
Gbp1	0.76657	0.0383315
Prg4	0.764628	0.008744
P2ry4	0.764255	0.0231138
Cd163	0.763905	3.109e-17
Spc25	-0.761935	0.002749
Mmp3	-0.754109	0.000111
AABR07026984.1	0.751317	0.0239791
Oprk1	-0.750562	0.002496
Tnfsf18	-0.750493	0.0363622
Neurl3	0.748443	1.88e-05
Cdkn3	-0.744266	0.0002611
Hdc	0.744138	0.0004622
AABR07030498.1	-0.744124	0.000893
Kcnip2	-0.743309	7.75e-05
Cartpt	-0.742788	0.004109
Mrc1	0.739063	8.037e-07
Msh5	0.738241	0.0005574
Tspan4	0.738156	0.0374131
Arl14	-0.736395	0.001361
Saxo2	0.735404	0.0165871
Fscn3	0.733471	0.001056
Vsir	0.729607	0.002047
Rtkn2	0.728534	0.0148682
Ect2	-0.727479	0.002103
Ccr1	0.727474	1.478e-05
Mmrn2	0.725529	0.0471776
LOC100909609	0.723559	0.0474579
Reg3b	-0.721154	7.45e-06
Clec4a2	0.717299	0.0007083
AABR07002870.2	0.714181	0.043822
Ctse	-0.713431	0.009344
Dclre1c	0.712547	0.011667
Mgp	0.711624	0.003642
LOC102553814	-0.711497	0.0002995
Srpk3	0.710797	8.502e-29
Ldhc	0.708692	2.833e-11
Havcr2	0.705737	0.00109
Adcy4	0.704046	1.688e-07
AABR07021804.1	0.703731	0.0112148
Trh	0.703182	0.029867
Cdh19	0.702772	0.0264213
Vwf	0.701868	0.0004307
Anln	-0.701774	0.0459033
Slco2b1	0.701725	0.004969
Kcnmb3	0.698516	0.004146
Ctsz	0.698438	3.991e-07
C1ql3	0.698276	4.032e-08
Impg2	0.698068	1.172e-08
Oas1h	0.698052	0.001281
Cenpf	-0.696322	0.0141635
Amh	0.689176	0.0248872
Depdc1	-0.688868	0.0412201
Fgf23	-0.687192	0.0109512
LOC100360940	0.684117	6.288e-07
Tal1	0.683739	0.0297905
Gmfg	0.6831	0.0103891
C1r	0.680521	1.773e-06
Sla	0.678943	0.005626
Bdkrb2	0.678694	2.865e-10
L3mbtl1	0.677623	2.604e-05
Rps6ka2	0.677146	1.968e-24
Vax1	0.676612	0.0007701
Ervfrd-1	0.674766	0.002108
Il31ra	0.67359	0.0321559
Fam64a	-0.672978	0.0418582
AABR07058976.1	0.672652	0.0454717
AABR07034573.3	0.667068	0.0371274
Casp12	0.666963	0.0009085
Il15ra	0.665815	0.00293
Zfp385b	-0.66581	2.268e-09
Sfrp4	0.665506	1.554e-05
LOC500035	0.664154	0.0362639
Krt71	-0.664126	0.0189119
Calcr	-0.661512	0.0341656
Wnt6	-0.660945	0.0413059
Aadat	0.660427	0.0008327
C4b	0.659675	2.693e-07
Pcdhga9	0.658653	7.886e-05
Cxcl1	-0.656965	0.003114
Arhgap25	0.656885	0.00551
Ly6d	0.65654	0.044116
AABR07060963.1	-0.650762	7.003e-05
Adam1a	0.649812	2.967e-07
Rn50_13_0801.2	0.649413	7.577e-05
Slc15a3	0.6488	0.016885
RGD1309995	0.647745	0.0006912
Gp1ba	0.647703	0.0380073
Trim69	0.647067	1.814e-07
Cct8l1_2	0.645228	0.000299
Il1r2	-0.645046	0.009467
Clec4f	-0.644505	0.0006933
Dennd4a	0.641463	5.558e-42
Mx2	0.641223	2.276e-12
Nuf2	-0.636588	0.0276423
AABR07022113.1	-0.636507	0.009653
Ccr3	0.636392	0.0480737
Pttg1	-0.635785	0.0475228
Rin3	0.635336	0.0008284
Ccl20	-0.634316	1.826e-06
Rac2	0.634261	0.002565
Htr1f	0.633247	0.0259446
Clec10a	0.633048	9.47e-08
Snx20	0.632266	0.010742
Nfe2	0.632248	0.0139135
Cdc20	-0.631776	0.0100215
Gnrh1_1	0.629039	0.006561
Fes	0.626891	0.0293378
Mest	0.625907	4.907e-49
Cenpa	-0.623769	0.0380073
Ces1f	-0.623082	0.001928
Birc7	0.621176	0.0220631
Lyve1	0.619413	2.186e-05
Adm	0.618814	2.795e-06
Ecscr	0.618721	3.589e-05
Ggta1	-0.618524	0.0299026
Itgb3	0.617608	0.0377176
Slc10a1	0.617596	0.0353402
AABR07008424.1	-0.612741	0.0106613
Eng	0.612358	0.0109736
Ciita	0.611533	0.0001408
Birc5	-0.610286	0.023828
Per2	0.606245	0.0002427
Htr2b	0.606155	0.0163828
Sh2d1b	0.605962	0.006355
Wfdc18	0.605607	4.536e-06
Glipr1	0.60393	0.0276802
LOC103692570	-0.603249	0.009545
Icam1	0.601574	1.804e-39
LOC100360238	0.601474	2.335e-12
Slc6a12	0.599039	0.004309
LOC100364027	-0.597277	0.0046
Treml2	0.594597	0.0227057
Tmem116	0.588257	2.362e-14
Ch25h	0.586874	4.216e-17
Dhcr24	-0.585881	0.005349
Anlnl1	-0.584407	0.0239365
Scimp	0.584326	0.0163593
Guca2a	0.583999	0.0349453
Ankrd2	-0.581831	0.0001148
Pax4	0.580943	0.0003398
Duoxa2	-0.580744	0.002114
Myh6	0.576089	0.007783
Casp4	0.574054	0.006448
Sebox	-0.573641	0.009955
Bicc1	0.572601	0.004072
Serpine1	0.572304	0.004324
Sec16b	0.571621	1.918e-30
Adgb	0.571027	0.00939
Fgl2	0.566494	7.695e-10
AABR07015846.1	0.566425	0.0393394
Bst2	0.566215	0.00136
Sele	0.564132	1.454e-10
Dab2	0.563793	0.0187528
Hrh1	-0.563303	0.001372
AABR07036542.1	-0.560931	2.995e-05
Dhh	0.560781	2.842e-06
Rhpn2	-0.55997	0.0464676
Adgrf3	0.558704	0.001773
Jaml	0.558527	0.0339817
RGD1559482	0.55835	2.423e-05
Stard9	0.558067	0.0418582
Gjc2	0.556816	0.0151823
Ano5	0.556723	0.0304508
Csf1	0.556051	3.555e-14
Mvd	-0.55385	5.227e-06
Trpm2	0.553218	8.017e-17
Loxhd1	0.552451	0.001709
Cebpd	0.551995	1.153e-29
Clec4b2	0.55187	0.0340775
AABR07071228.1	0.550185	0.033898
Ccdc184	-0.548649	0.0447947
Actl7a	0.546854	0.001163
Gja4	0.545286	0.0311044
Hsf5	0.545225	0.0232994
Idi1	-0.54475	0.0112103
Antxr2	0.543284	0.006363
Emilin2	0.540121	0.0374937
Ceacam1	0.538757	0.005968
Ush1c	-0.538013	6.397e-07
Itpka	-0.537728	0.004453
AABR07043085.1	0.537607	0.0213573
Hist2h3c2_2	0.535318	0.002131
Pla1a	0.534471	0.0002333
Vax2	-0.533939	0.0003832
Snai3	0.532208	0.007825
Fasn	-0.531333	0.003806
Cacng5	-0.531288	0.0215887
Runx3	0.530573	0.0257863
Jun	-0.526364	1.365e-10
Rn60_1_2212.3	0.525428	0.005463
Mchr1	0.524562	0.004067
Sh3d21	0.524403	0.0006003
C1rl	0.524163	9.406e-06
Fgg	-0.523755	0.000401
Il23r	0.523292	1.834e-22
Alox5ap	0.52235	4.869e-08
Ppp1r42	0.521273	4.498e-12
Timp1	0.520901	2.116e-28
Dhcr7	-0.519387	0.0215887
Rgs9bp	0.519259	0.0037
Ttk	-0.517373	0.0002429
Slc43a1	0.516979	0.002044
Hgf	0.515468	3.269e-06
Tk1	-0.515171	0.015305
Sgip1	0.514965	0.002002
Rgs1	0.51472	0.0394425
Ptx3	0.513183	2.556e-15
Cyp27b1	-0.513072	5.837e-06
Rad54b	0.511181	0.00114
FAM187A	0.510418	8.485e-05
Cpg1	0.510401	8.374e-05
Wrap53	-0.507302	0.0214985
Colec12	0.507298	0.0463105
Zfp488	-0.507128	7.185e-06
Ddn	-0.506774	0.0418582
Dhrs9	-0.5066	8.992e-05
Il11	0.506113	4.788e-06
Ifit1	-0.50524	0.0003698
Tshr	0.504613	0.000513
Msn	0.504569	3.551e-09
Actl7b	0.504215	0.001451
Cyp2c11	0.504103	0.002555
Rn60_20_0049.10	0.503662	0.026611
Has1	0.503647	8.796e-12
Amz1	0.503495	0.0475272
Gsto2	0.502627	0.004513
Acrbp	0.502357	0.005349
Ampd1	0.500472	0.0273182
Ubtd1	-0.498766	1.288e-17
Col27a1	0.498549	1.426e-08
Fbxo2	-0.497899	0.0009569
Drd4	-0.497529	9.652e-09
AABR07001444.1	0.495099	0.0131216
Prtg	0.494116	3.033e-22
LOC100911403	0.493625	0.0116032
Igsf7	0.492898	0.0095
Crym	0.492511	0.0006462
Ptpn6	0.490633	0.005485
Cfap157	0.490459	7.282e-12
Fam132a	-0.487063	0.00997
Hmgcs1	-0.486122	0.0004769
Rn60_20_0069.2	0.484793	1.077e-08
Dao	-0.484386	0.0007455
Gstt3	-0.484267	0.002201
Fdps	-0.483512	0.002296
Prss36	0.482978	0.0009755
Kcnj10	-0.482603	5.282e-07
LOC257642_2	0.481894	0.006776
Pcdhga11	0.481599	0.000301
AABR07005794.1	0.480931	0.007161
Hmga2	0.477774	2.062e-10
AABR07027431.1	0.477469	0.002845
Mmp19	0.47744	0.0325566
Aacs	-0.47644	5.736e-06
AABR07065531.5	0.475953	0.03316
Acat2	-0.474775	0.004509
Ackr2	0.474243	2.615e-05
Tmem176b	0.473919	0.0320687
Ankrd12	0.473884	0.0002409
Sp5	0.473741	1.461e-12
Spag8	0.473198	0.0471776
Doc2b	0.473007	0.00884
LOC103689943	0.472471	0.0114114
Cldn6	0.470232	6.129e-05
Cd55	0.468714	2.343e-06
Sesn2	-0.468439	2.923e-06
Pdia5	0.467712	0.0459033
Dnah17	0.464441	0.008229
Cox4i2	-0.464242	0.004652
Socs2	0.463952	1.357e-06
Tbx19	0.463906	0.008318
Dse	0.463747	0.0446923
Thbs1	-0.463226	0.0006361
Lamp3	0.463047	4.541e-06
Hes5	-0.462986	1.125e-11
Arl5c	0.462636	1.524e-15
LOC102553880	0.460247	0.004032
Eno4	0.458657	3.514e-07
LOC688801	0.457466	0.0192215
NEWGENE_2319083	0.456625	0.0224523
Slc12a4	0.456322	0.01464
Dear	0.455813	0.0164683
Daglb	-0.455508	0.00859
Notch4	0.454792	0.003653
Ryr3	0.454738	0.0119539
Tnxb	0.452025	0.003534
Espn	-0.450952	4.45e-05
LOC108351043	-0.450512	0.0009916
Cxcl17	0.448619	9.857e-08
Pde6h	0.448318	0.0004424
Ifi30	0.446983	0.001661
Clic2	0.446306	0.008918
Ahsa2	-0.445959	0.038916
Bricd5	0.445858	0.0263017
Usp18	0.445271	4.234e-11
Rlbp1	-0.444365	7.343e-05
Pdzd3	0.443975	0.0398499
Med20	-0.443452	0.002026
Fscn2	0.442512	2.204e-13
Arhgap29	0.442226	1.069e-05
Tal2	0.441964	0.0005636
Lynx1	-0.441083	0.008698
Fdft1	-0.440877	0.002562
Scara3	0.43939	2.145e-06
Sntb2	0.43933	0.0343398
Cd207	-0.43844	0.007804
Tfrc	-0.438371	0.001609
Rsad2	-0.437033	8.158e-17
Epb41l2	0.436907	0.0003103
Bbs12	0.435208	0.001479
Osmr	0.433305	2.696e-32
Tmem202	0.431833	0.001906
Ptgs2	0.43088	3.197e-12
Dram1	0.430851	0.0001571
Bcl3	-0.43054	3.801e-08
AABR07054554.1	0.430121	2.2e-05
Desi1	-0.429935	2.378e-05
AABR07052523.1	-0.429387	0.006353
LOC257642_4	0.427999	0.0192742
AA926063	0.427872	3.946e-05
Wee2	0.427664	3.196e-11
Tm7sf2	-0.427153	0.002434
Galnt16	-0.42654	0.006296
Ccdc113	-0.42515	6.837e-07
Axl	0.424836	0.002506
Shc4	0.423814	0.0005574
Lzts1	-0.423142	0.001984
NEWGENE_6497122	-0.422656	0.0005574
Adamtsl1	0.42252	0.0180058
Adgrb2	-0.421625	0.0002217
LOC100910979_2	0.421359	0.0001286
PVR	-0.42029	7.14e-06
Prrg1	0.419945	0.0366873
Aurka	-0.419078	0.0471005
Etv2	-0.418779	0.0468115
Cmtm5	0.418232	0.0244098
Npff	-0.417151	0.001155
Hs3st2	-0.416625	0.005103
Plpp1	0.415977	0.0003103
Pou2f2	0.415505	0.0289935
AABR07064867.2	0.415039	0.0231138
Ccnd2	0.414529	0.0001561
Oas1i	0.414074	0.0322116
ENSRNOG00000050453	0.413563	3.664e-15
Sqle	-0.412006	0.004685
Prr32	-0.411469	0.0344648
Car14	-0.410517	2.91e-06
Map3k6	-0.410384	2.701e-14
Efemp2	0.410121	1.567e-08
Tnfrsf1b	0.410107	0.0171695
Scg2	-0.407708	2.115e-05
Cry2	0.407198	0.0136888
Slc25a29	-0.406946	0.0389044
Tram2	0.405385	0.007408
AABR07024439.1	-0.404691	0.0163248
Tubb4a	-0.404659	0.0137288
Myc	-0.404494	0.0002889
Dll3	0.403753	0.0106578
Msmo1	-0.403121	0.0119539
Cib2	-0.401512	1.285e-05
Plekha4	0.401477	0.0361549
Nr1d1	0.401438	6.522e-05
Serpind1	0.401014	0.002338
Cep164	0.40075	0.0159837
Ooep	-0.400715	0.0263009
Cd93	0.398362	0.0112484
Clic4	0.397856	0.0129378
AABR07063901.1	0.397337	0.00637
Vash1	0.397313	0.0006845
Alox5	0.397062	0.00293
Fmnl2	0.396941	0.0104864
Nfkb2	-0.39664	0.0074
Ccdc96	0.395776	0.001728
Cebpb	-0.395168	6.221e-05
Akr1c19	0.391183	0.003321
Clec2l	-0.390059	0.0380934
Slfn13	0.389805	7.04e-06
Frem3	-0.388972	0.0419381
Il22ra2	-0.388864	0.0398499
Tmem108	0.388299	0.0001975
Ogfod2	-0.387085	0.027034
Fos	-0.386861	1.589e-12
Tbcc	-0.386245	0.0321672
Stmn3	-0.386126	0.0477314
Nat8f3	0.385541	0.0002251
AABR07013729.1	0.385125	0.0199098
Zfp951_2	0.384627	0.0002251
Ildr2	0.384369	0.001862
Caprin2	0.383913	0.0177008
Tff2	-0.383465	0.004738
AABR07026509.1	0.381704	0.0168116
AC099449.1	0.381246	0.008111
Pomc	0.380831	2.979e-08
Zfp280b	0.379852	0.006138
Chac1	-0.379615	0.00277
AABR07017253.1	0.379573	0.0245936
Shisa4	-0.378893	0.0003681
LOC103694877	-0.37758	0.0329246
Zfp707l1	-0.377565	0.0244519
Wdr31	-0.377385	0.000559
AABR07002674.1	-0.377207	0.004632
Klf11	0.376635	9.886e-38
Slc1a5	0.375899	1.484e-17
Rell2	-0.375607	0.0373369
Rasip1	0.375308	0.007105
Rnd1	-0.375235	0.001519
Ldlrad1	0.374954	0.0006036
Dok2	0.373727	0.003713
Nek6	0.372427	2.576e-06
LOC100909505	-0.371987	0.0002214
Ano3	0.371362	0.0122275
AABR07015080.2	0.371173	0.006315
Stx2	0.370049	0.0238275
Kcng4	0.369058	9.944e-50
AABR07015066.1	0.368949	0.006917
Kntc1	-0.368777	0.0323229
Gldc	0.368624	2.307e-11
Mak	0.368505	6.58e-13
Vsx1	-0.368326	6.742e-05
Klhl4	0.367636	0.018203
Cd302	0.367555	0.007045
AABR07049960.1	0.367104	0.002506
LOC102550577	0.366546	0.0136888
Adamts3	0.36587	4.922e-05
Adam11	-0.365858	0.0006471
Mcm8	-0.365322	0.0296663
LOC361346	0.364775	1.07e-06
Piwil1	-0.364035	1.179e-06
Syt3	-0.363975	0.024188
RGD1307315	0.362605	5.747e-05
AABR07015078.1	0.362399	0.006544
AABR07063424.1	0.361984	0.007381
Tcp11l1	0.361684	8.764e-05
AABR07015055.1	0.361098	0.008624
Spink7	-0.360659	0.0446664
Ier3	0.36012	5.314e-14
Apcs	-0.358063	2.639e-05
Dmp1	0.357863	0.004418
Hmox1	0.35782	2.578e-28
Egr2	0.356875	2.628e-10
Svep1	0.356826	0.0236182
Klhl29	0.356403	3.642e-39
RGD1560289	0.355533	0.0292374
Cfi	-0.355515	0.002997
Gpr137c	0.355441	2.019e-31
Cacng4	-0.355335	0.0361549
LOC108348047	0.353195	3.469e-05
Sycp2	0.352924	0.009692
Faap100	0.352841	1.841e-09
RT1-CE9-ps1	0.352824	2.199e-06
Pcdhgb4	0.352586	0.0007431
Cabp2	-0.35205	0.0114451
Slc4a1	0.35197	0.0125127
Fbln5	0.351795	0.0331184
RGD1563294	-0.351744	0.0112725
Diras1	-0.351528	0.015463
Syt15	-0.351358	0.0281868
Vps13a	0.351005	0.001212
Pih1d3	0.34987	0.0374904
Mafb	0.349788	0.0126983
Clspn	0.349777	3.589e-11
Samd4a	0.347279	9.614e-10
Sla2	-0.347242	0.0454219
Tnip2	0.347186	4.05e-33
LOC108348118	0.347185	3.828e-23
Zfp707	-0.347114	0.0339249
Bhlhe40	0.347084	1.641e-07
Magee2	0.346677	0.0001909
Fosl1	0.3465	1.99e-70
Lvrn	-0.345337	6.522e-05
Btg4	-0.344455	1.028e-17
Zyg11a	0.34416	0.0262304
Pwwp2b	-0.343652	0.0007663
Gadd45g	-0.343288	1.173e-30
Mllt11	-0.342836	0.005249
Nr2e3	-0.342666	8.844e-16
Cacnb3	-0.342611	0.0266531
Hpcal1	-0.342276	1.444e-06
Csdc2	-0.341981	0.0128899
Kcnab3	-0.341894	0.006544
Pde8b	-0.341733	2.496e-06
Mmp7	0.341689	2.706e-06
Kdelc1	0.340853	0.0419841
Rnd2	-0.34082	5.77e-06
Acsm5	0.340749	0.007977
Plekha8	0.340209	3.156e-44
Nlrc5	0.339942	2.94e-06
Eno1	-0.339232	0.0001001
Angptl4	0.337693	4.632e-25
NEWGENE_1565644	-0.337553	0.0289396
Yif1b	-0.336681	0.0291412
Capn3	0.3366	0.004347
Egr1	-0.335683	5.572e-10
St8sia2	0.33527	0.0371776
Gadd45a	-0.330912	0.002026
Lin7b	-0.330897	0.0202998
Znf48	-0.329057	0.005108
Klhl25	-0.328584	0.037993
Cyp1b1	0.328173	0.0332059
Samd5	0.327667	0.000245
Tmem86b	0.327638	0.002042
Rab32	0.325626	2.099e-06
Kif11	-0.325463	6.23e-25
Rpap1	-0.325423	0.005363
Nr5a1	0.325243	2.047e-05
Igfbp4	0.324906	0.003994
Mdn1	0.32454	4.074e-07
AABR07058985.2	0.323876	0.002998
Ptp4a3	0.323321	0.001053
Nos3	0.322509	2.106e-06
Litaf	-0.322397	5.462e-08
Jakmip1	-0.321496	0.0371274
Alkbh4	-0.321342	0.0489235
Ccdc81	0.321085	0.001984
Crb1	0.320664	0.001866
Slc36a2	-0.32045	0.0258101
Sdc3	0.320323	0.0175025
Aldoc	-0.320149	0.009768
Trhr	0.319908	0.001856
Lgals3bp	0.319444	1.84e-05
Fam135b	0.318283	5.012e-07
Dennd2a	0.318032	0.0007073
Plcd4	0.317944	0.003676
Gucy2f	0.317662	0.007442
Zbtb45	-0.317354	0.0230335
Dkk3	-0.317325	0.006082
Plch2	0.317024	3.86e-12
Aldoa	-0.316345	0.0006067
LOC102551095	0.312611	0.0189316
AABR07053509.2	0.312483	0.0281743
Depdc7	-0.312206	1.589e-12
Ctbs	0.312011	0.0179713
Frmd4a	0.31171	3.237e-05
AABR07047256.1	-0.310941	0.0255449
Lbp	0.308796	8.73e-10
Hspa1l	0.308091	0.0280542
Ptgis	0.307847	1.027e-06
Lrrc75b	-0.30744	0.0007136
Mt3	-0.307139	0.0277023
LOC685431	-0.306142	0.0222554
Acss3	0.30534	9.384e-06
Ankrd1	0.305335	9.324e-09
Rspo4	0.305049	0.0202382
Cyp2d4	-0.304993	2.673e-05
Stard10	-0.304627	6.552e-06
Zfhx2	0.304556	7.907e-05
Cep128	0.304192	6.562e-05
Sipa1	0.304036	0.0204927
Hcn2	-0.303092	0.0434674
Hip1r	-0.302782	0.003269
Gadd45b	-0.302654	8.848e-07
F8	0.302605	0.0275077
ENSRNOG00000051922	0.302245	3.163e-07
Cyb5r1	0.301638	0.0361357
Mt2A	0.301436	3.866e-49
Sulf1	0.301173	0.0471207
Ino80d	0.300797	0.0008284
Fgfr1	0.30062	0.0002294
LOC691215	0.300549	0.0432932
Plxna2	0.300451	0.005821
Acadsb	-0.300418	0.0101923
Cdc42ep4	-0.300325	0.003676
Sbk2	0.300309	0.002536
March1	0.300306	5.358e-06
Raph1	0.300255	0.007804
Crebrf	0.299579	1.187e-09
LOC108349594	-0.298902	0.001701
Sh2b3	0.298158	0.003012
Tox2	-0.297849	0.0413842
Atp5g3	-0.297636	0.006125
Lama4	0.297236	0.0301128
Eml1	0.297063	0.007761
Rad9b	0.296781	6.04e-07
Slc44a5	0.296627	0.001308
Rrp1b	-0.296402	5.683e-14
Lag3	0.296168	0.0239706
Impg1	0.295577	0.0003933
Hmgb2l1	-0.295499	4.741e-05
Cc2d2a	0.295421	0.0009611
Pdp2	-0.292771	0.0001579
Hsbp1l1	-0.292535	2.193e-17
Pcf11	0.291305	7.539e-07
Polg2	0.291193	9.433e-08
Ankmy1	-0.290665	0.0446723
Angptl8	-0.290598	0.0164847
Zeb2	0.289316	0.008057
Lmod1	-0.288926	0.004259
Hdac9	0.288878	0.002846
Lrg1	0.288346	3.017e-11
Fndc5	-0.288214	0.001519
Nr6a1	0.288064	0.0065
Il1r1	0.287536	8.514e-14
Ccdc155	0.287372	0.0001705
Clu	0.287251	6.832e-05
Tnfaip6	0.286664	5.903e-06
C5ar2	0.286461	0.0008251
Bmp15	0.286018	0.005349
Trib1	-0.285408	0.002038
Slc38a2	-0.285201	0.0001676
Npm3	-0.284539	0.0292625
Zfp516	0.284065	6.971e-28
Tnfaip3	0.283898	0.0003908
AABR07025023.1	0.283853	3.418e-08
Nsdhl	-0.283675	0.004379
Hcn1	0.283602	0.0001705
Sphk1	-0.283372	0.020938
Rs1	0.283087	1.182e-06
Slf2	0.283048	0.003349
Gnl3	-0.282885	0.0207585
Ndrg3	-0.282867	9.837e-10
Bora	0.282792	0.033009
Mertk	0.282635	0.0284036
Osbp2	-0.282243	2.804e-06
Zfp593	-0.281637	0.0198504
Rmnd5b	-0.281491	0.00569
Esco2	-0.281435	0.005875
Pgam1	-0.279844	0.00223
Eno2	-0.279615	0.0451149
Lap3	0.279105	4.578e-06
Cenpl	-0.279019	0.0227768
Zbtb7b	-0.2784	0.007283
Prc1	-0.27778	4.155e-12
F13a1	0.277712	0.017174
Ppp1r10	0.277389	3.259e-08
Ddx10	0.277045	0.0125899
Hmmr	0.276557	0.007751
Rfwd3	-0.27569	0.0409178
Cep295	0.275652	0.006635
Palm3	-0.275362	0.0218503
Bcl6	-0.275247	0.00442
Dpysl3	0.275092	0.003735
Arr3	-0.274941	7.04e-06
Hsd17b13	0.27463	0.0421466
Ccdc157	0.274418	0.003223
Pfkfb3	0.273678	0.023828
Mob3c	0.27367	0.0005392
Ckmt1	-0.273291	8.888e-06
Slc1a7	-0.273038	4.844e-05
Nsg2	-0.272883	0.0407258
Mab21l1	0.272729	2.136e-17
Slc12a6	0.272501	8.328e-06
Hacd3	-0.271893	0.006092
Prima1	-0.271798	0.0005396
Ppp1r18	0.27173	2.914e-06
Trim47	0.271655	3.238e-06
Nyx	0.269618	0.0412754
Id1	0.269247	0.0296605
Zfp358	-0.268851	0.003463
Adamts4	0.268603	2.361e-31
Stmn1	-0.268286	0.0361619
Rgs20	0.26785	0.0002831
Lrrc8b	0.267825	4.7e-06
Adora2b	0.266756	0.002103
Ifit3	-0.266756	0.0112319
Pycr1	-0.266578	0.0156004
Ier2	-0.266525	0.006647
Rn50_20_0464.2	0.266408	0.0192579
Agtpbp1	0.26627	1.315e-19
Egfl6	-0.265922	0.0003505
Pou3f2	0.265892	0.006508
AABR07070043.1	-0.265285	0.0101167
Ccdc78	0.264929	7.14e-06
Zbtb20	0.264799	0.0126378
Cyth2	-0.264451	0.00082
Plcd3	-0.264448	3.037e-09
Fbxo44	-0.264118	0.0242336
Grin2c	-0.263933	0.00234
Ifi44	0.263862	1.512e-09
Hsph1	-0.263639	0.0002461
Sts	0.263139	0.0170419
Xiap	0.262334	1.198e-05
Adam12	0.262332	7.041e-07
Tsks	0.2623	1.125e-05
Tex28	-0.262151	0.00334
Znf768	-0.262073	0.001475
Aplp1	-0.261433	0.045992
Spred3	-0.261338	5.242e-05
Cplx4	-0.260714	0.014328
LOC108348175	0.260573	0.0100717
Klhl35	0.259355	0.0110721
Ccdc50	0.258673	0.0447394
Faim_2	0.257499	4.83e-09
Rab30	0.25678	1.15e-08
Crot	-0.25667	0.0002158
Poteg	-0.255912	0.026717
LOC100911825	0.255497	0.0009128
Rbm3	0.25504	0.0343398
Grin2d	-0.254757	0.0112725
Gk	-0.254604	0.0147227
Got1	-0.254456	1.996e-05
LOC500227	-0.254131	0.0002325
Folh1	0.253985	0.00494
Herc3	0.253734	0.0002429
Slco5a1	-0.253572	0.0163282
Stc1	0.253484	9.003e-18
Agbl3	0.253174	0.003669
Ptprr	-0.252934	0.0270305
Avil	0.252766	0.0002657
Dio3	-0.252557	0.0008376
Nfe2l2	-0.2525	0.001318
Tead1	0.252179	0.005518
Unc45a	-0.252029	0.0277701
Siah2	-0.251756	0.0101593
Zswim1	-0.251601	0.0378447
Yars	-0.250867	0.0003926
Xbp1	-0.250541	0.001917
Col2a1	-0.24996	0.002706
Serinc4	0.249558	0.0287382
Mok	-0.249391	0.0114204
Slc14a1	0.24925	1.405e-06
Map1b	0.248032	0.0004699
Mgarp	-0.247493	0.0013
Nog	0.247415	0.0419791
Cuedc1	-0.247281	3.54e-05
Plpp3	0.247108	4.267e-05
Pmm1	-0.24668	0.002423
Glul	-0.246594	1.725e-06
Cd14	-0.246137	0.003642
Hk2	0.245668	2.956e-12
Slc6a6	0.24453	4.446e-06
Nme1	-0.2443	0.0287136
Il6r	0.24413	0.0007813
Nol8_2	0.243869	0.004168
Fam53a	0.243446	0.0407956
Slc18a1	-0.241285	0.0001424
Fzr1	-0.241247	0.0118436
Tmem237	0.240863	0.001501
Nes	0.240223	9.22e-11
Rapgef5	-0.24017	1.882e-06
Casc4	0.239927	0.001714
Dut	-0.239372	0.000441
Tigar	-0.23929	0.003778
RGD1309621	0.23915	0.0236182
Map4k3	-0.23905	0.029668
Idh3a	-0.238917	0.0488974
Hs6st1	-0.238858	0.0043
Swap70	0.237944	0.0187101
Adamts9	0.237881	4.175e-07
Sema7a	0.237781	4.579e-16
Apc2	-0.237126	0.0359907
Acap2	0.236941	0.0459033
Naa35	0.236585	6.081e-27
Bag1	-0.236572	0.015463
RGD1311805	-0.236503	2.302e-08
Egfl8	0.236354	0.0008327
Rtn2	-0.236036	0.002018
Cpe	-0.235994	3.788e-07
Cyp11a1	-0.235819	0.004509
Opn1mw	-0.235605	0.0002766
Esr2	0.235253	5.865e-12
Psat1	-0.235134	1.366e-05
Leng1	-0.234971	0.003534
Slc25a10	-0.234637	2.119e-08
Nrl	0.234355	4.408e-09
AABR07058017.1	0.234207	0.0100717
Zc3h12c	0.234187	6.318e-06
B4galt5	0.234178	1.789e-07
Ctnnd2	-0.233753	0.0324467
Dmrta1	-0.233622	3.326e-05
Spsb3	-0.232657	0.01159
Ppp1r27	-0.232527	0.0304461
Srf	-0.231914	0.0213573
Cngb1	0.231863	9.29e-09
Rgs9	0.231801	0.0343398
Chd7	0.231794	4.137e-05
Col5a3	0.231477	6.169e-05
RGD1565616	0.231044	0.0403947
LOC100360218	-0.230935	0.0005303
Pcsk5	-0.230899	0.002397
Zwint	-0.230706	0.0301781
Ptprz1	-0.230242	0.00375
Rfc4	-0.230196	0.0215887
Medag	-0.229277	0.0001199
Akap6	0.229212	0.007136
Procr	0.229171	1.542e-08
Eef2k	0.228904	0.0216447
Fam49a	0.228464	0.0115895
Ctnnal1	-0.228062	0.0006012
Kcnn1	-0.22776	5.647e-05
S1pr3	0.227477	2.049e-07
Pde6g	0.227453	0.0001859
Ifi44l	-0.226904	0.0164291
Noct	-0.226292	4.457e-07
Cmc1	-0.226117	0.005036
Grk1	-0.226067	2.709e-06
Tnfrsf9	0.225936	1.38e-13
Irak3	0.225842	2.949e-05
Slc24a1	0.225731	1.647e-08
Nkd1	-0.22572	7.761e-11
Pde8a	-0.224847	3.54e-05
Gale	-0.224714	0.0001142
Nkiras1	-0.224696	0.0434674
Gpr63	0.224172	0.0001346
Tecr	-0.224097	0.0164291
Arl16	-0.224005	1.318e-05
Asic1	-0.223544	0.0116844
Irf9	0.223508	9.886e-38
Vps13c	0.223494	0.0499788
Stxbp1	0.223349	0.001308
LOC100911548	-0.2233	6.305e-07
Fgf11	-0.223279	6.436e-05
Map3k8	0.222986	3.678e-06
Cds1	0.222046	3.593e-10
Ptpn20	-0.221333	3.965e-05
Pnldc1	0.221135	0.00637
Dcaf13	-0.221046	0.0129378
Fancb	0.221011	0.001403
Pfkl	-0.219249	9.755e-07
Tars	-0.218474	4.485e-13
RGD1309540	0.218261	0.0126975
Lmo2	0.2177	0.003021
Msantd2	0.217613	0.002555
ENSRNOG00000043417	0.217326	0.0359189
Slc6a1	-0.217269	0.0280542
Rhebl1	0.216128	2.037e-13
Irak4	-0.215913	0.00849
Nox4	0.21585	0.009365
RGD1563714	0.214132	0.002103
Cerk	-0.213947	1.924e-08
Slitrk2	0.213378	0.001742
Ahr	0.213269	6.257e-25
Gpsm2	0.213185	0.001009
RGD1306271	0.213161	0.008861
Uckl1	0.212987	9.448e-09
Hipk3	0.212491	0.005712
Polr3k	-0.212448	0.015463
Ttc14	0.212129	0.0433626
Pdk4	0.212058	1.043e-08
Ccr9	0.211535	0.0001596
Slc7a11	0.211101	0.0008474
Cnot6	0.210877	0.0341103
Coa3	-0.210666	0.0363168
Alkbh5	0.209977	0.002084
Glycam1	0.209468	5.056e-05
Scd2	-0.209049	0.006474
Mocos	0.208925	0.001986
Fam110d	0.208685	0.0004057
Crispld2	0.20867	0.00187
Chrnb4	0.208127	0.0003123
Pkig	0.206693	0.0001408
Nudt15	0.206658	0.0003762
Camsap3	-0.206458	0.0308603
Fam69c	-0.206112	3.888e-09
LOC361646	0.205433	0.005179
Rasal2	0.205095	1.642e-07
Prkcz	-0.204508	0.011354
Dnmbp	0.204493	0.0116231
Srxn1	0.204391	0.0002956
Trnp1	-0.204183	0.0349916
Agpat3	0.203752	0.0002259
LOC362863	0.20363	0.0255914
Ccdc13	-0.203438	0.0119249
Polr1e	-0.203408	0.0457023
Nat14	-0.20335	0.001003
Dusp4	-0.203286	6.428e-05
Dnase1l3	0.203173	0.001139
Cox6c	-0.202565	0.0418582
Ermn	0.202393	0.002902
Parp3	0.202071	1.641e-07
Ralgds	-0.201935	0.003366
Helz2	0.201696	1.201e-08
Ubap1l	0.20145	0.0008686
Zc3h10	-0.201097	0.0144412
Trnau1ap	-0.200997	0.0331406
Il17ra	0.200232	0.0001111
Abcb9	-0.20018	0.000615
Cabp5	-0.200148	0.002439
Ralgps1	0.200139	0.0001335
Hspa5	-0.200102	0.003234
Impdh1	0.200087	2.263e-10
ENSRNOG00000038119	-0.199981	1.863e-12
Rbbp6	0.199708	0.00487
Zfp36l2	0.199314	2.377e-09
Sec22c	-0.199127	7.036e-05
Ckb	-0.199	0.0007305
Pvt1	0.198983	4.032e-08
LOC100911109	0.198697	0.0006202
Alpl	-0.198255	7.127e-11
Acbd6	-0.198114	0.0365896
Fzd9	-0.197784	0.0394425
Pcdhga8	0.197703	0.005182
Hs2st1	0.197442	0.001234
Creb5	0.197113	0.0209311
Celsr2	-0.19663	0.002912
Tmprss3	-0.196629	0.0002444
LOC680200	-0.196319	0.0121349
RGD1560010	-0.196279	0.0336893
Ppp1r9a	0.195304	0.0417986
Dlc1	0.195055	4.525e-09
Glmn	0.19492	3.433e-06
Speg	0.194708	8.23e-39
Trib2	0.194318	0.004823
Mfge8	-0.194066	0.035535
Plekha1	0.194019	0.0122275
Fam107a	0.193889	0.0196914
Dusp5	-0.193429	2.139e-12
Dhx58	0.193384	1.504e-05
Nudt6	0.193063	0.0004058
Cptp	-0.192617	0.002627
Greb1l	-0.192608	0.0345408
Ncbp3	-0.192579	0.00853
Ndufb6	-0.192345	0.006911
G6pc	0.19219	0.0129056
Cyp4b1	0.192127	0.0380073
Spryd3	-0.191491	0.0259073
Itsn2	0.191399	0.005414
Rnf125	0.191207	5.138e-08
Agt	-0.191149	5.348e-07
Rassf4	0.191063	4.578e-06
Kmt2c	0.190574	0.0001901
Agrp	-0.190196	0.008274
Gem	-0.189652	6.346e-05
Dst	0.189617	0.0145257
Ahctf1	0.189256	0.0398444
Nfat5	0.189176	0.008717
Hist3h2ba	-0.189063	0.0003301
Vldlr	0.189035	0.0005054
Sp140	0.188584	0.0297905
Fgd4	0.188218	0.042113
LOC100911319	0.187933	0.002423
Mtfp1	-0.187435	0.007194
Flt1	0.18738	2.947e-09
Nacad	-0.186922	0.002065
Tp53bp2	-0.186668	0.0343398
Efnb3	-0.186522	0.003565
Vdac2	-0.186459	0.0270305
Pitpnm1	0.186445	1.557e-05
Paqr9	0.186398	1.821e-10
Cit	-0.186126	0.0001705
LOC103691744_1	-0.185773	0.00375
Dner	-0.185751	0.044116
Oxa1l	-0.185365	0.0309019
Golga4	0.184824	4.867e-10
Ankrd44	0.184571	1.306e-05
Tubg1	-0.184545	0.005802
Hacl1	0.184346	0.0272199
Enc1	-0.183653	1.914e-06
Pgbd5	-0.183492	0.0475041
Cars	-0.183388	0.004154
Pus7l	-0.183302	0.0143345
Vamp1	-0.183189	0.0250244
Prkdc	0.183008	0.0140912
Zfp865	-0.182916	0.0115952
Slc38a3	0.182858	4.314e-06
Megf10	0.182746	4.032e-07
Arhgap42	0.182343	0.0003583
Radil	0.182294	0.0413539
Cchcr1	-0.182164	0.0235116
Bhlhe41	0.181811	0.0165399
Mlf1	0.18167	3.514e-07
Dhrs13	-0.181488	0.0348125
Mroh2a	0.181257	0.0001652
Kremen1	-0.181043	6.926e-30
LOC100911440	-0.180642	0.0005363
Gapdh	-0.18062	0.0140666
Ecel1	0.180277	2.968e-06
Ano6	0.179439	0.00186
Epor	0.179206	0.0005195
Zdhhc2	0.178915	0.005931
LOC100912611	0.178831	0.002086
Klf7_1	0.178825	0.006066
Cbl	0.178556	0.0465738
Gnb1	0.17823	1.708e-13
Slc25a22	-0.177583	0.021306
Rho	0.177443	1.714e-10
Znrf1	-0.176907	0.040464
Slbp	-0.17619	0.033009
Tmem63b	-0.176052	1.624e-05
Mpp3	-0.175842	0.0131016
Oas1e	-0.1757	4.277e-05
Sdf2l1	-0.175066	0.0281868
Lamb3	-0.175003	0.0143345
Man1a1	0.174809	0.0276905
Gm9918	0.174363	1.027e-06
Klc3	-0.174124	9.181e-05
Bnip3	-0.17408	0.0236036
Pnrc1	-0.173859	0.0459031
Adrb1	-0.173653	0.0407245
Cpne8	-0.173506	0.0003204
Ripply3	-0.173473	0.0134139
Kctd14	-0.173258	4.221e-05
Obsl1	0.173222	0.0186983
ENSRNOG00000051719	-0.173204	0.0131016
Tulp1	0.173046	1.794e-05
Ndufb3	-0.171873	0.038916
Fez1	-0.17181	0.0127467
Klhdc3	-0.171288	0.0356011
LOC100911776	0.170764	0.0167019
Snta1	-0.170191	0.0001923
Laptm4b	0.169971	0.0296258
Pigs	-0.169933	0.004397
Sfswap	0.16979	0.0353781
Adamts7	0.16979	3.539e-08
Pml	0.169726	4.612e-07
ENSRNOG00000056151	0.169563	0.0458264
Atp2b1	0.169546	0.0215887
Higd1a	-0.169074	0.0259073
RT1-CE10	-0.168856	0.0256106
Spag5_2	-0.168744	0.0331809
Sult1d1	-0.168289	0.007161
Fam188b	0.168074	3.284e-18
Creb3l2	0.167832	0.008861
Dclk1	0.167624	2.242e-20
Atp5i	-0.167587	0.030232
Krt18	-0.166679	7.554e-05
Kctd7	-0.166399	0.003534
Sgpl1	0.165947	3.318e-06
LOC108348083	0.165886	0.0004911
LOC108348052	-0.165544	1.163e-06
Fam169a	0.16548	4.549e-06
Mpped2	0.165169	0.0398444
Gapdh-ps2	-0.164967	0.003046
Pprc1	-0.164308	0.0002567
Ndufs8	-0.164166	0.0253009
Rcvrn	0.164042	3.657e-13
Ttc16	0.164036	4.065e-05
Rbp3	0.163756	6.813e-09
Atf7	0.16369	6.408e-07
Arhgap19	-0.163391	0.0270852
Cryz	-0.163343	0.0435907
Blmh	-0.163257	0.0231544
Siva1	-0.163227	0.0100422
LOC108351137	-0.162704	0.0114114
Qprt	0.162681	0.0218162
Reep2	-0.16258	0.004785
Rhot1	0.162411	0.005212
Btbd3	0.162396	2.028e-10
Zfp238	0.162317	0.0004262
Adcyap1r1	-0.162204	0.0276905
Jam2	0.161838	0.01464
Mlst8	-0.16171	0.0179713
Npy2r	-0.161621	0.001859
Nkiras2	-0.161234	0.0418582
Acox3	0.160871	0.0378447
Btc	0.160361	2.051e-08
Cdk5r2	-0.159688	0.0255468
LOC102551435	-0.159639	4.295e-05
AABR07044570.1	0.159412	4.671e-06
Dusp16	-0.159397	0.0424291
Mtmr11	0.159162	0.0001092
Gngt1	0.158734	0.0146602
Icmt	0.158455	9.423e-06
Gpld1	-0.158353	0.0003142
Pdpn	0.158333	7.204e-17
Acsl6	0.158232	0.0146417
Gnat2	0.158206	0.002712
Ccdc86	-0.158167	0.0148912
RGD1565033	0.158112	0.001606
Adamtsl4	0.158092	0.0409
Qser1	0.157911	0.00537
Csrnp1	-0.157807	3.059e-13
Rgs22	0.157626	5.727e-18
Abcc5	0.157601	0.0244131
Ttyh1	0.157571	0.00324
Wdr47	0.157451	0.001209
Slc46a3	0.157377	0.0384871
Qpct	-0.157335	0.0147896
LOC102548013	0.157334	0.0006036
Slc25a30	0.157238	8.775e-87
Ankrd35	-0.156998	0.0346988
Mms19	-0.156817	0.0003051
Thyn1	-0.156685	0.023828
Ift27	-0.156664	0.004098
Rfx7	0.156653	0.0186493
Xpnpep3	0.156369	0.008118
Anks4b	0.156192	7.809e-07
Ppef1	-0.15619	1.519e-15
ENSRNOG00000047276	0.155232	1.145e-08
Tmem253	0.155223	0.0229521
Slc25a25	-0.154836	0.005455
Med12	0.154548	0.0475205
RT1-CE7	0.15445	0.004064
Tdrp	-0.154409	0.0434674
Mdh1	-0.154183	0.0356493
Hirip3	-0.15364	0.0451412
Slc7a1	-0.153437	0.001834
Ndufb11	-0.153426	0.002493
Dusp8	-0.153248	9.819e-17
Ppp2r2b	0.15285	0.0002241
Padi2	0.152845	0.000138
Ap1b1	-0.152681	0.0133604
Slc4a7	0.152608	2.411e-08
Ash1l	0.152487	0.006534
Mfhas1	0.152471	8.458e-07
Acvr1c	-0.152214	0.0257968
Vcam1	0.151999	0.0001473
Gnb3	-0.151958	1.272e-05
Isg15	-0.15192	0.0334401
Tsku	0.151772	0.0229955
Insl3	0.151733	0.001479
Pcdh15	0.151663	0.006383
Tob1	-0.151455	0.001238
Hnf4a	0.151368	0.007091
Siglec10	0.151339	0.002313
Gcnt4	0.151332	0.0308216
Miga2	-0.150823	0.0246017
Jak2	0.150747	0.0002723
Dpf3	0.15061	5.355e-10
B3galt5	-0.150544	0.0140666
Nfkb1	-0.150286	0.0001081
March3	-0.150074	0.006905
Asb4	-0.150009	0.0413212
Ndufaf6	0.149816	0.0257914
Xkr6	0.149599	0.0367663
Tob2	-0.149536	0.006296
Cblb	0.149487	0.001054
Ptpn1	-0.149423	3.279e-10
Nop2	-0.149381	0.0194898
Gabra1	0.149341	2.216e-05
Stat5b	-0.149102	3.256e-07
Pik3c2a	0.148515	0.0003082
Nudt14	-0.148392	0.007024
Ifnar2	0.148338	0.001097
RGD1566368	-0.148337	0.0268661
Cldn12	-0.148103	0.0140585
Chtop	0.148011	0.007949
Igf2bp2	-0.147588	9.753e-05
Armc2	0.146897	0.0112626
LOC100912599	-0.146846	0.0275734
Ndufb9	-0.146664	0.0328999
Mtcl1	0.146489	0.001856
Man2a2	0.145982	8.294e-05
Uqcrb_1	-0.145483	0.0007201
Tifa	0.145346	2.949e-06
Fam179a	0.145239	3.533e-14
Kif19	0.14507	0.0007022
Proz	0.144952	0.0439964
Samm50	-0.144911	0.0345408
Ppt2	-0.14489	0.004467
Camk1g	-0.144555	0.0003689
Map2k4	-0.144413	0.0119716
Fcer1a	-0.144357	0.0243886
Nlk	0.14416	0.0006704
Uqcrb_2	-0.143692	0.004823
Exog	-0.143604	0.0184179
Adipor1	0.143543	0.0280407
Cd47	0.143282	5.613e-06
Slc26a8	0.143055	3.125e-14
Ift57	0.142584	8.201e-19
Nabp1	0.142493	0.0002457
Arg2	-0.142367	0.005463
Slc16a1	-0.142162	7.135e-13
Zfp14	-0.141514	0.00251
Acaca	0.141493	8.888e-06
Bhlha15	0.141211	0.0112626
Ikbip	0.140771	0.0449994
Sema6c	0.140623	3.12e-07
Acat1	-0.140583	0.0259643
Bend3	0.14054	0.005072
Lrp4	0.140379	6.129e-05
Tap1	-0.140202	0.0001097
Rock2	0.140021	0.00653
Slc17a7	0.139932	5.529e-07
Elovl4	0.139642	0.005586
Iars	-0.139627	0.0003933
Dlg4	-0.139556	0.006902
Parp12	-0.139202	0.007903
Abhd8	-0.139165	0.008285
Sh3pxd2b	-0.138809	0.001281
Ptpn2	-0.138702	0.0331184
Mzt2b	0.138692	0.001944
Fam222a	-0.138378	0.0001061
Glipr2	0.138226	3.32e-05
Lamc1	0.137823	0.0001899
Ctnnbip1	-0.137814	0.0007075
Lamc3	-0.137667	0.003221
Sntg2	0.137625	6.816e-10
Pqlc1	-0.137563	0.0006176
RGD1306227	0.136512	1.843e-05
Sostdc1	0.136165	0.003291
Josd1	-0.136057	0.0215887
Ankrd34a	-0.135786	0.0132793
Il13ra1	-0.135751	0.0002603
Derl3	0.135638	0.003637
Dctn3	-0.135417	0.0215887
Il6st	0.134875	1.389e-20
RGD1562136	-0.134078	0.0456168
Wnk4	0.133993	0.002343
Ncan	-0.133896	4.644e-08
Pcbp4	0.133861	0.0144122
Zc4h2	-0.13362	0.0293796
Ap2a2	-0.133364	2.507e-05
Aars	-0.133062	0.0003234
Zfp295	-0.132631	1.015e-06
Stard7	0.132294	0.041375
Eps8	-0.132128	0.0004256
Zfp775	-0.13205	0.009698
Scrn2	-0.132038	0.005026
Pitpnm3	0.131918	3.828e-23
Wdr46	-0.131917	0.0395345
XAF1	0.131549	0.002031
Mitd1	-0.131347	0.0277701
Eif2s2	-0.131327	0.005947
Atg4b	-0.131031	0.016751
Tmem150c	0.130725	0.0281837
Vwa1	0.130725	0.002534
Plk3	-0.130318	0.001865
Arl5a	0.130289	0.0480999
Ddx21	-0.130265	0.0006845
Slc9a8	0.130158	1.459e-23
Hmgn1	-0.130131	0.002946
Dnmt3b	0.130009	0.002231
Psd2	-0.129819	0.0452961
Egf	-0.129718	0.006406
Mettl1	-0.12949	0.0006285
Dgkd	0.128953	0.0001124
Hagh	-0.128774	0.0383315
Dot1l	-0.128519	0.0335107
AABR07019437.3	-0.128446	0.0477715
Hectd2	0.128	0.0104405
Sned1	0.12784	0.0004892
LOC679739	-0.12775	0.0336874
Piezo1	-0.127675	0.0001367
Mmp13	0.127484	0.0003288
Wasf1	-0.127336	0.0237134
Phgdh	0.127288	0.0430778
Pcbp2	-0.127285	0.0285694
Sod2	-0.127245	1.677e-11
Rnf5	-0.127047	0.0373545
AABR07056470.1	0.126829	0.002471
Rhob	-0.126794	0.00198
AABR07043354.1	0.126533	0.0403118
LOC108348128	-0.126248	0.0291389
Rabgef1	0.125855	0.0005125
Qsox1	-0.125728	1.412e-09
Rrad	-0.125654	2.302e-08
Dctn1	-0.125646	0.00604
Rai14	0.125521	0.0003991
Dennd3	-0.125337	3.362e-05
Nim1k	0.124874	2.382e-14
Zfp365	0.124418	0.0002096
Eif2ak2	-0.124297	1.216e-06
Lrrtm2	0.123662	0.0449389
Milr1	-0.123545	0.0362987
RT1-CE1	0.123296	0.004833
C4bpa	0.123188	0.0287382
Gnaz	-0.123134	0.0005303
Glis3	0.123032	0.0102355
Sh3glb2	-0.123012	0.0258681
Rabac1	-0.122933	0.045156
AABR07070456.1	0.122889	0.000321
Rangrf	-0.122864	6.229e-05
Tnfrsf12a	-0.122839	4.187e-14
Ankrd28	0.12275	0.0209311
Ttyh3	-0.122649	0.002578
Podn	-0.122608	0.0412009
Nupr1	-0.122387	0.00643
Relb	-0.122322	8.676e-14
Pogk	0.122275	0.0280542
Aldh18a1	-0.122195	0.0007696
Fam161b	-0.122135	0.0114879
Otop3	-0.122041	0.0363168
Sp7	0.121987	0.003325
Phykpl	0.121927	0.0239903
Hspa2	0.121771	0.002255
Zranb1	-0.121758	0.0359189
Ppp1cc	-0.12154	0.003636
Wdr43	-0.12144	0.0468226
Lman1	0.121383	4.248e-06
Cmpk2	0.121366	2.197e-06
Chsy1	0.121274	6.069e-21
Bbs7	0.121268	0.006902
LOC108348049	-0.121079	0.0123032
Oaf	0.120614	0.001784
Rrh	-0.120502	0.0229955
Nsmce4a	-0.120307	0.0340807
Ercc1	-0.120253	0.0213573
Dpysl5	0.120242	0.025611
Calb1	-0.120096	0.0173591
Olfml3	0.120081	0.0452982
Mkks	-0.119667	0.0112725
Smchd1	0.119511	0.0140864
Eml2	-0.119427	1.805e-06
Kcne1	-0.11929	0.0196836
Fndc3b	0.11919	0.0169796
Flrt3	-0.119086	0.0002026
Nme3	-0.118659	0.0002096
Nars	-0.118354	0.003495
ENSRNOG00000058094	0.118309	0.0005574
Fam53b	0.118308	3.262e-14
Itga7	0.11824	0.0198821
Tmem100	0.118066	2.09e-05
Slc3a2	0.117908	0.002652
Dbndd2	-0.117776	4.122e-06
Scg5	-0.117626	0.001632
Slc16a8	0.117593	0.0174579
Atp1a3	-0.117574	4.752e-05
Myd88	-0.117491	1.215e-07
Manf	-0.117426	0.0123756
Cdh26	-0.11709	0.0004577
LOC102550892	0.11696	0.0465126
Ccdc28b	-0.116958	2.432e-06
Nkain1	0.116841	0.0367825
LOC100909913	-0.116123	3.461e-06
Hdac4	-0.116083	0.0245171
Ghdc	-0.115853	2.052e-07
Ypel2	0.115838	1.216e-06
Hdhd2	-0.115787	0.0163282
Fhod3	0.115666	0.007375
Pdzd8	0.115563	0.0369052
Pak3	0.115538	0.007405
Add3	0.115395	0.001543
Mmd2	-0.115237	4.462e-09
Ifih1	-0.114821	1.703e-10
Arl4d	-0.114056	4.216e-17
Rnf19b	-0.114008	4.238e-05
Isca1	-0.113997	0.0394425
Tyms	0.11392	0.0004426
Cdhr1	0.113367	0.0008318
Abhd17b	-0.113232	0.001711
Arhgef33	-0.113208	0.000523
Dscaml1	-0.113181	2.085e-10
Rdh11	0.113111	0.0009172
Srd5a1	-0.112937	0.000455
Plpp2	-0.112807	1.293e-12
Whamm	-0.111982	0.001543
Dtd2	-0.111976	0.0179749
LOC103689983	0.111757	0.0198837
LOC100910163	0.11174	9.375e-08
Pkm	0.111477	2.7e-05
AABR07052529.1	0.111372	0.0238275
Nav1	0.111361	0.001299
Lmnb1	-0.111268	0.0194832
Car6	-0.110871	0.0156362
Nup35	-0.110581	0.0301379
Gramd2	-0.11041	2.711e-20
Cttnbp2	0.11018	0.0004999
Neurod1	0.109787	2.688e-10
Zfp455	-0.109661	0.039608
Lrit3	0.109198	0.0001394
Heatr1	-0.108719	0.0128899
Srsf6	0.108628	0.0169663
Pde6b	0.107955	0.00687
NEWGENE_619861	-0.107828	0.005626
Ppard	-0.107686	7.156e-07
Atg16l2	0.107655	0.001874
Fbxw11	-0.107453	0.0331809
Uck1	-0.107256	0.0161633
Snrk	0.107073	0.0117897
Endog	-0.106965	0.0262365
Crem	-0.106946	1.694e-10
Aplf	-0.106767	1.034e-09
Il4r	0.106712	8.232e-12
Naxe	-0.106657	0.009594
Chl1	0.106649	9.291e-06
Dcun1d3	-0.106631	0.0481136
Btg2	0.106216	0.004858
Ppp2r5d	-0.105997	0.0371647
Plat	0.105958	2.655e-08
Stat3	0.105646	7.87e-27
Plaur	-0.105593	0.002493
Haus4	-0.105395	0.001543
Cacna2d1	0.105039	0.0100215
Ankrd33b	-0.104997	1.216e-06
Asns	-0.104889	8.477e-38
Hmgn2	0.10478	2.669e-05
Casp3	-0.104681	1.311e-55
Mllt10	0.104566	0.0002766
Gramd1b	-0.104467	9.173e-06
Ghitm	-0.104428	0.025611
Taf11	0.104313	0.005709
Hes6	-0.104148	0.003349
Adam9	0.103911	0.002757
Gpr151	0.103597	0.0004942
Ndufs5	-0.103445	0.0481935
Ntng2	0.103311	1.329e-05
Cyb561a3	-0.103296	0.003435
Nphp4	0.103264	3.818e-41
Cd63	0.103235	0.003265
Lrp1	0.103073	0.0499707
Sertad2	0.102969	0.0413198
Mpdu1	-0.102874	0.00691
Zbtb2	-0.102853	0.00637
Igsf9	0.102852	5.126e-06
Spsb1	0.102805	7.722e-07
Pnpt1	0.102552	0.0244098
Gfpt2	-0.102461	2.769e-12
Cep89	-0.101916	0.0001415
Utp20	0.1019	0.008513
Rhobtb2	0.101847	0.00364
Plcd1	-0.101714	0.0276879
Bbs9	0.101293	0.0002691
AABR07028488.1	0.101087	0.0205638
Sfxn2	0.101055	0.0156362
Tp53	-0.100942	0.003534
Nav2	-0.100798	0.0205777
Edrf1	-0.100634	0.0300501
Taok3	-0.100293	6.047e-08
Ttll5	0.100269	0.0343398
Itpk1	-0.0999236	0.0242493
Lrrc47	-0.0998723	0.0134002
Mapk14	-0.0997651	2.673e-05
Gabarapl1	-0.0997443	0.0274334
Map2k6	-0.0995326	0.0393235
Kif21b	0.099113	0.0129056
Brd3	-0.0990298	0.0189967
Chst2	0.0989565	0.006355
Fopnl	-0.0979182	0.0329485
E2f5	0.0977976	0.005476
Pdc	0.0976794	1.605e-07
Malt1	0.0975978	0.0281774
Myb	-0.0973881	0.005516
Inpp5b	-0.0972599	0.0169448
Tmem35	-0.097193	0.007024
LOC685933	0.0970035	0.0215887
Pros1	0.0968892	8.77e-05
LOC103689920	0.0968843	0.0122191
Sept4	-0.0968011	1.694e-05
Cep250	0.0965635	8.828e-09
LOC103692719	-0.0964234	0.0116461
Asb8	-0.0963499	0.0154665
Tma7	0.0960863	7.149e-05
Camsap1	0.0960653	2.085e-09
Irf2bpl	0.0960638	2.247e-23
Odc1	0.0959567	3.615e-15
Hebp1	-0.0959121	0.0335234
RGD1564171	-0.0958001	7.991e-08
Cfap54	-0.095723	0.0001127
Abhd14b	-0.0956455	0.0002283
Stx11	0.0953787	6.206e-05
Reep6	0.0948822	3.99e-27
Plk5	-0.094773	0.0112725
Abca7	-0.0946462	0.0124304
Parp10	0.094515	0.008749
Ndufa4	-0.0942876	0.0006063
Pcdhga10	0.0942805	0.014385
Sbno2	-0.0942644	2.645e-13
Haghl	0.0940386	3.179e-05
Pmaip1	-0.0938708	0.0002134
Madd	0.093424	0.004005
Tgif1	-0.0934059	9.634e-05
Fnip1	0.0932286	0.0389429
Ube2j1	-0.093179	0.0116419
Aprt	0.0929823	0.004281
Sumo3	-0.0929567	0.008209
Acot8	-0.0928975	0.002224
LOC100911486	0.0925716	0.0009426
Lif	-0.0925397	3.101e-37
Daw1	-0.0925281	0.00114
Adamts1	-0.0919401	1.368e-08
Capn7	0.0918899	0.001711
Aipl1	0.0914373	8.049e-07
Tnr	-0.0911127	0.0186493
Tril	0.090918	3.924e-08
Svop	-0.0908636	1.027e-06
Morn4	-0.0899451	0.0146044
Esyt1	0.0895236	0.0179749
Deaf1	-0.0891963	0.0490521
Gars	-0.0891804	0.005518
Asxl3	0.0890851	0.0127447
Rnf151	0.0888067	0.0142077
Isyna1	-0.088708	0.006829
Cnga3	-0.0884182	0.004975
Zbtb5	-0.0883967	0.0003288
Mknk1	0.0880669	0.0363622
Grik1	-0.0880125	0.0338308
Ankrd52	-0.0877288	0.001723
Cnga1	0.0877022	0.005831
Guca1a	0.0875453	0.0005017
Foxn4	0.0873892	1.746e-12
Otud7b	0.0871843	1.055e-06
Cadm4	-0.0871478	0.0408937
Parp9	0.0871382	9.975e-08
Stk40	-0.0869767	0.003463
Tsen2	0.0867316	0.0375424
Mnt	-0.0867197	0.0146992
Kif20a	-0.0865899	0.0184142
Naf1	0.0861319	0.002429
Eea1	0.0859575	0.0252316
Rela	-0.0859095	0.0008627
Glb1l2	0.0858358	9.197e-28
Zyx	-0.085611	0.0189183
Ripk1	-0.0856109	0.0004486
Pip4k2c	-0.0854446	4.491e-05
Diaph3	0.0854097	0.0264316
Rcan1	-0.0851225	3.712e-14
Sulf2	-0.0849129	0.0005281
Ppp1r15a	-0.0848359	0.005486
Camta1	0.0847324	2.639e-05
Zfp2	-0.0845919	0.004146
Zmym5	-0.0845165	0.0127893
Rdh5	0.0845066	0.0003147
Miox	0.0844196	1.727e-12
Tex9	0.0841958	0.00135
Mcm4	-0.0841912	0.005924
Lmo1	-0.0841153	0.029251
Tbc1d32	-0.08397	0.0287887
Asrgl1	-0.0838945	0.00571
Smarcal1	-0.08388	0.0125899
Brsk2	-0.0836398	7.907e-05
Rnf215	0.0834502	0.0004323
Fen1	-0.0831462	0.0112725
Hook2	0.0830842	0.0123032
Rhot2	-0.0830581	0.007686
Tshz2	0.0826731	0.0270975
Tln2	0.0825543	7.575e-05
Pyurf	-0.0825488	0.0104924
Grsf1	-0.0825458	0.0001488
Car2	-0.0824799	0.001692
Zfp36	-0.0823388	9.012e-07
Fgfr2	0.0822014	0.0106578
Pum3	-0.082149	0.0356951
Fgf7	0.0821018	5.719e-05
Chst3	-0.0820676	0.001463
Spa17	0.081956	0.0331406
LOC100912365	-0.081722	0.0146518
Npm1	-0.0816555	0.002492
Hsd17b4	0.0814035	0.00537
Gpr37	0.0807478	1.432e-05
[truncated: 561 more rows]
