# Supplementary material for: Comprehensive transcriptomic analysis reveals canonical and novel pathways modulated by nanoceria in mammalian retinal degeneration
Source: Research Square preprint supplement (doi:10.21203/rs.3.rs-7456023/v1), 2025-10-25
Supplement: Supplementary file 6 [file bf840d4fef334253201eed69.xlsx]

## Sheet: Table_S3_VEH_vs_CTRL_DEGs
Gene	log2FC	FDR
Gdf1	-9.2257	0.0309619
Krt27	-8.51387	0.0254226
Krt73	-8.03999	0.0103704
Kb23	-7.78079	0.007633
Krt81	-7.64301	0.0227655
Krtap16-5	-6.88638	0.0145811
Krt86	-6.69988	0.005278
Krt85	-6.31897	0.0227655
LOC102549714	5.1787	1.846e-05
Rn50_15_0408.6	5.16546	2.556e-07
Krt25	-5.1339	0.0227655
Impad1_1	-4.91802	0.015529
RGD1562652	4.34126	0.005278
AABR07037356.1	3.61249	0.0003902
Adad1	-2.67568	0.0187391
AABR07015917.1	2.66205	0.0329816
Mmp8	2.59848	0.0389322
Cnmd	-2.57178	0.005278
Actg2	-2.41723	2.556e-07
Vom2r44	-2.29662	2.355e-05
RGD1562660	1.9881	0.0399958
LOC497796	1.92099	0.005278
Lilrb4	1.90951	0.0106619
AABR07018226.2	1.84559	0.0235868
Cxcl11	1.81155	0.004358
Il17rb	1.62096	6.827e-05
Ttc24	-1.62033	0.0161452
Dnah6	1.59439	0.0336682
Nog	-1.53108	0.001009
Bco1	-1.52544	0.0383918
Cntnap5b	1.40898	0.0002551
Chi3l1	1.3842	6.827e-05
Nlrp1a	1.25955	0.048728
S100a4	1.12311	0.0183275
Hhatl	-1.08732	0.0373972
Trib3	-1.08678	0.0187391
AABR07017268.1	-1.02245	0.006297
Etv4	-1.01422	1.846e-05
Rn50_3_1467.1	0.855433	0.0320688
Tmem237	0.619568	0.0482971
Tmem98	-0.604074	0.0227655
